# Supplementary material for: Biobanking marine biodiversity in the Arctic
Source: Frontiers journal article supplement (doi:10.3389/fmars.2024.1385797), 2025-02-17
Supplement: Table_1.pdf [file Table_1.pdf]

## Table Of Contents

|                                                                                                                                             |    |
|---------------------------------------------------------------------------------------------------------------------------------------------|----|
| <b>Glossary &amp; Examples of: Cooperative Science, Biorepositories &amp; Networks, and Field/Laboratory, Legal, and Metadata Standards</b> | 1  |
| Abbreviations, Acronyms, and Glossary                                                                                                       | 1  |
| Microbiome Cryopreservation Starter Terminology                                                                                             | 12 |
| Expeditions, Observatories, and Cooperative Fieldwork Projects                                                                              | 13 |
| Biorepositories and Biorepository Networks                                                                                                  | 16 |
| Standards: Fieldwork and Laboratory Protocols and Tools                                                                                     | 25 |
| Standards: Access and Benefit Sharing and Legal and Policy Requirements and Initiatives                                                     | 29 |
| Standards: Metadata                                                                                                                         | 34 |
| <b>Bibliography</b>                                                                                                                         | 38 |

### Glossary & Examples of: Cooperative Science, Biorepositories & Networks, and Field/Laboratory, Legal, and Metadata Standards

The lists below are not intended to be comprehensive.  
Rather, they provide examples for the topics discussed to serve as starting points for further reading.

#### Abbreviations, Acronyms, and Glossary

|              |                                                                                          |
|--------------|------------------------------------------------------------------------------------------|
| ABC SG       | The IUCN Animal Biobanking for Conservation <a href="#">Specialist Group</a>             |
| abiotic data | Environmental physicochemical variables, s.a. temperature, salinity, etc..               |
| ABNJ         | Areas Beyond National Jurisdiction                                                       |
| AMCC         | <a href="#">Ambrose</a> Monell Cryo-Collection at the American Museum of Natural History |
| ANRRC        | Asian Network of Research Resource Centers                                               |
| archaeome    | The archaeal portion of a microbiome.                                                    |
| ATCC         | American Type Culture Collection                                                         |

|                         |                                                                                                                                                                                                                                                                                                                                                                                                                                                                                                                                                                                                                                                                                                                                                                                                                                                                                                                                                                                                                                                                                                                                                                                                                                                                                    |
|-------------------------|------------------------------------------------------------------------------------------------------------------------------------------------------------------------------------------------------------------------------------------------------------------------------------------------------------------------------------------------------------------------------------------------------------------------------------------------------------------------------------------------------------------------------------------------------------------------------------------------------------------------------------------------------------------------------------------------------------------------------------------------------------------------------------------------------------------------------------------------------------------------------------------------------------------------------------------------------------------------------------------------------------------------------------------------------------------------------------------------------------------------------------------------------------------------------------------------------------------------------------------------------------------------------------|
| axenic                  | single-strain, pure, monoculture                                                                                                                                                                                                                                                                                                                                                                                                                                                                                                                                                                                                                                                                                                                                                                                                                                                                                                                                                                                                                                                                                                                                                                                                                                                   |
| bacteriome              | The bacterial taxa of a microbiome. (The definition is not universally agreed on.)                                                                                                                                                                                                                                                                                                                                                                                                                                                                                                                                                                                                                                                                                                                                                                                                                                                                                                                                                                                                                                                                                                                                                                                                 |
| BBMRI-ERIC              | Biobanking and BioMolecular resources Research Infrastructure - European Research Infrastructure Consortium                                                                                                                                                                                                                                                                                                                                                                                                                                                                                                                                                                                                                                                                                                                                                                                                                                                                                                                                                                                                                                                                                                                                                                        |
| BBNJ                    | Biodiversity Beyond National Jurisdiction                                                                                                                                                                                                                                                                                                                                                                                                                                                                                                                                                                                                                                                                                                                                                                                                                                                                                                                                                                                                                                                                                                                                                                                                                                          |
| biobank / biorepository | <p>A biobank is a type of a biorepository. Beyond that, opinions diverge. Many authors use the terms "biobank" and "biorepository" interchangeably. Others reserve "biobank" for medical biorepositories, such as collections of tissue samples. Some authors propose distinctions based on services offered, public or private access, or funding models. Many of the authors we cite include museums, databases of metadata, observations, historical records, etc..</p> <p>The term "biobank" is also sometimes used to signify natural stores of material. For example, plant seeds can lie dormant in soil for years, and have been called "seed banks". Microbes in dormant stages may survive for thousands of years in marine sediments ("sediment archives"), permafrost, and glaciers. Such environments have been called "microbial biobanks" in literature. In this text, we use the term "biobanks" to encompass all human-made repositories of biological material or data. We exclude nature-made archives.</p> <p>Related terms useful for literature searches: biorepository, biological resource centers (BRCs), repository, natural history collection, museum, accessioning, <i>ex situ</i> conservation, cryobank, cryorepository, collections, archives.</p> |
| BioBlitz                | A citizen science initiative, usually conducted over a short period of time, such as a day. Participants identify and record biodiversity (or abiotic factors such as pollution) in each participating geographic area. quote: "BioBlitzes are intense periods of biological surveying in an attempt to record all the living species within a designated area."                                                                                                                                                                                                                                                                                                                                                                                                                                                                                                                                                                                                                                                                                                                                                                                                                                                                                                                   |
| biocuration             | Collecting biological information and making it accessible to humans and search algorithms. Data generation is currently outpacing biocuration.                                                                                                                                                                                                                                                                                                                                                                                                                                                                                                                                                                                                                                                                                                                                                                                                                                                                                                                                                                                                                                                                                                                                    |
| bioprospecting          | Analysis of organisms with the goal of finding bioactive compounds useful in biotechnological, pharmaceutical, and other industries.                                                                                                                                                                                                                                                                                                                                                                                                                                                                                                                                                                                                                                                                                                                                                                                                                                                                                                                                                                                                                                                                                                                                               |
| Bonn                    | Bonn guidelines on access to genetic resources and fair and equitable sharing of the benefits                                                                                                                                                                                                                                                                                                                                                                                                                                                                                                                                                                                                                                                                                                                                                                                                                                                                                                                                                                                                                                                                                                                                                                                      |
| CARE                    | CARE principles (Collective Benefit, Authority to Control, Responsibility, Ethics)                                                                                                                                                                                                                                                                                                                                                                                                                                                                                                                                                                                                                                                                                                                                                                                                                                                                                                                                                                                                                                                                                                                                                                                                 |
| Cartagena               | Cartagena protocol on biosafety                                                                                                                                                                                                                                                                                                                                                                                                                                                                                                                                                                                                                                                                                                                                                                                                                                                                                                                                                                                                                                                                                                                                                                                                                                                    |
| CBD                     | Convention on Biological Diversity                                                                                                                                                                                                                                                                                                                                                                                                                                                                                                                                                                                                                                                                                                                                                                                                                                                                                                                                                                                                                                                                                                                                                                                                                                                 |
| CBM                     | Common Biorepository Model Project                                                                                                                                                                                                                                                                                                                                                                                                                                                                                                                                                                                                                                                                                                                                                                                                                                                                                                                                                                                                                                                                                                                                                                                                                                                 |

|                                                                                              |                                                                                                                                                                                                                                                                                                                                                                                                                                                                                                                                                                                                                                                                 |
|----------------------------------------------------------------------------------------------|-----------------------------------------------------------------------------------------------------------------------------------------------------------------------------------------------------------------------------------------------------------------------------------------------------------------------------------------------------------------------------------------------------------------------------------------------------------------------------------------------------------------------------------------------------------------------------------------------------------------------------------------------------------------|
| citizen/community/crowdsourced/participatory science                                         | A scientific method where data or specimens are collected or analyzed by volunteers. Participants may be subject matter experts, stakeholders such as community activists or educators, or interested public.<br>For more information, visit the websites of the Association for Advancing Participatory Sciences ( <a href="#">AAPS</a> ) (formerly the Citizen Science Association) and the European Citizen Science Association ( <a href="#">ECSA</a> ).                                                                                                                                                                                                    |
| CoML                                                                                         | Census of Marine Life                                                                                                                                                                                                                                                                                                                                                                                                                                                                                                                                                                                                                                           |
| cryodamage                                                                                   | Damage to genetic materials, cell structures, and tissues due to the stresses of toxic, osmotic, and thermal shock during the cryopreservation process.                                                                                                                                                                                                                                                                                                                                                                                                                                                                                                         |
| cryorepository / cryogenic repository / cryobank / cryocollection / cryopreserved collection | An archive of physical specimens, such as tissue samples, gametes, algae, and bacteria that are preserved at ultra-low temperatures. The temperatures are typically either -80°C (in electric freezers) or -196°C (in liquid nitrogen). Liquid nitrogen vapor phase is also a common option, and is typically between -150°C and -165°C. The intent is to keep the material in stasis – living, and with the potential to be later used for cultures, germination, fertilization, etc..                                                                                                                                                                         |
| cryopreservation                                                                             | Cryopreservation is the act of either freezing or vitrifying (super-chilling to a glass-like state that does not form ice crystals) some biological material. In marine science, examples of cryopreserved specimens include: mammalian skin stem cells, fish eggs, coral sperm and larvae, algal cultures, bacterial cultures, and more.                                                                                                                                                                                                                                                                                                                       |
| cryoconservation                                                                             | The act of cryopreservation with the goal of cryoconservation. For example, fish gametes can be cryopreserved to facilitate genetic health interventions in aquacultured. Fish gametes can also be cryopreserved to assist active restoration and rewilding programs (cryoconservation).                                                                                                                                                                                                                                                                                                                                                                        |
| DMP                                                                                          | Data Management Plan                                                                                                                                                                                                                                                                                                                                                                                                                                                                                                                                                                                                                                            |
| digital voucher / e-voucher / virtual voucher                                                | Digital vouchers include photographs, audio and video recordings, etc.. They are a type of secondary vouchers (vouchers that can be used to help identify a species in the absence of conclusive evidence such as a whole physical specimen, which would be the primary voucher).                                                                                                                                                                                                                                                                                                                                                                               |
| DNA terminology                                                                              | (As suggested by Nagler et al. (2018))<br><br>eDNA – environmental DNA. Includes iDNA, exDNA.<br><br>exDNA – extracellular DNA (also called cfDNA – cell-free DNA). Includes esDNA, aDNA, cirDNA, and relic DNA. Estimated to comprise approximately 90% of the total DNA in ocean environments. Includes DNA from dead cells, DNA used in bacterial conjugation, and DNA actively produced by bacteria as structural materials when constructing biofilms.<br>iDNA – intracellular DNA<br><br>nsDNA – "non-soluble DNA", non-aqueous-extractable. Generally corresponds to iDNA.<br>sDNA – aqueous-extractable, "soluble DNA". Generally corresponds to exDNA. |

|                                                           |                                                                                                                                                                                                                                                                                                                                                                                                                                                                                                                                                                                    |
|-----------------------------------------------------------|------------------------------------------------------------------------------------------------------------------------------------------------------------------------------------------------------------------------------------------------------------------------------------------------------------------------------------------------------------------------------------------------------------------------------------------------------------------------------------------------------------------------------------------------------------------------------------|
|                                                           | <p>aDNA – ancient exDNA. Can remain preserved for thousands of years (perhaps up to a million).</p> <p>relic DNA – Sequences left over from previous ecosystem states. Relic DNA does not represent life that is currently present in the system (cannot be found in the iDNA metagenome).</p> <p>esDNA – extracellular self-DNA.</p> <p>cirDNA – circulating exDNA.</p>                                                                                                                                                                                                           |
| DNA voucher (proposed definition)                         | Proposed by Astrin et al., (2013) as: "the isolated and preserved, frozen or dried (usu. genomic) DNA. As a derived sample, a DNA voucher should not – if anyhow possible – function as specimen voucher." A type of molecular voucher.                                                                                                                                                                                                                                                                                                                                            |
| DOI                                                       | Digital Object Identifier. Like an RRID, a DOI is globally unique. It may be used to identify persons, datasets, published works, etc. No single identification method has yet been agreed on in the context of biobanking.                                                                                                                                                                                                                                                                                                                                                        |
| DOOS                                                      | Deep Ocean Observation System                                                                                                                                                                                                                                                                                                                                                                                                                                                                                                                                                      |
| DwC                                                       | Darwin Core Standard                                                                                                                                                                                                                                                                                                                                                                                                                                                                                                                                                               |
| dry shipper / cryoshipper / liquid nitrogen vapor shipper | <p>A portable container with absorbent internal insulation that is chilled down to cryogenic temperatures by pouring in liquid nitrogen and allowing excess nitrogen to evaporate off. Dry shippers are safe to transport by air or ship by courier. They can be used to flash-freeze specimens in the field. Cold temperatures can be maintained in the field for anywhere from a few hours to a few weeks, depending on the size of the container.</p> <p>(Bakker et al., 2020; Corthals and Desalle, 2005; Harvard Campus Services Environmental Health &amp; Safety, 2023)</p> |
| EBB                                                       | European Blue Biobank Network                                                                                                                                                                                                                                                                                                                                                                                                                                                                                                                                                      |
| EBM                                                       | Ecosystem-Based Management                                                                                                                                                                                                                                                                                                                                                                                                                                                                                                                                                         |
| EBVs                                                      | Essential Biodiversity Variables                                                                                                                                                                                                                                                                                                                                                                                                                                                                                                                                                   |
| <a href="#">ECCO</a>                                      | European Culture Collections' Organization                                                                                                                                                                                                                                                                                                                                                                                                                                                                                                                                         |
| EMBL                                                      | European Molecular Biology Laboratory                                                                                                                                                                                                                                                                                                                                                                                                                                                                                                                                              |
| <a href="#">EMODnet</a>                                   | European Marine Observation and Data Network                                                                                                                                                                                                                                                                                                                                                                                                                                                                                                                                       |
| EMP                                                       | Earth Microbiome Project                                                                                                                                                                                                                                                                                                                                                                                                                                                                                                                                                           |
| ENVO                                                      | Environment Ontology a semantic and ontological standard that describes the environmental variables that may be recorded in monitoring projects. Designed to produce metadata that is both human- and machine-readable. ENVO is part of the Open Biomedical and Biological Ontologies (OBO) set of standards. Is interoperable with other OBO standards.                                                                                                                                                                                                                           |

|                                            |                                                                                                                                                                                                                                                                                                                                                                                                                                                                                                                                                                                                         |
|--------------------------------------------|---------------------------------------------------------------------------------------------------------------------------------------------------------------------------------------------------------------------------------------------------------------------------------------------------------------------------------------------------------------------------------------------------------------------------------------------------------------------------------------------------------------------------------------------------------------------------------------------------------|
| EOVs                                       | Essential Ocean Variables – recognized metrics of abiotic (temperature, biogeochemistry, etc.) and biological ecosystem factors.                                                                                                                                                                                                                                                                                                                                                                                                                                                                        |
| epibiome                                   | The portion of the microbiome that is on the external surfaces or skin of the host.                                                                                                                                                                                                                                                                                                                                                                                                                                                                                                                     |
| ESB                                        | Environmental Specimen Bank                                                                                                                                                                                                                                                                                                                                                                                                                                                                                                                                                                             |
| ESBB                                       | European, Middle Eastern, and African Society for Biopreservation and Biobanking                                                                                                                                                                                                                                                                                                                                                                                                                                                                                                                        |
| EU                                         | European Union                                                                                                                                                                                                                                                                                                                                                                                                                                                                                                                                                                                          |
| eukaryome                                  | The microeukaryote community within a microbiome.                                                                                                                                                                                                                                                                                                                                                                                                                                                                                                                                                       |
| extended / holistic specimen               | A physical specimen accompanied by metadata on provenance, project contributors, field and preparation protocols, analysis data and products, and the specimen's local environmental context. The local environmental context includes links to other specimens from the same location or time, associated behavioral observations and abiotic (physicochemical) measurements, etc.. The extended specimen components generally reside in separate collections or databases, and are linked through metadata. At this time, interlinking databases to create extended specimen aggregates is difficult. |
| extremophile                               | An organism that is adapted to life in extreme environments, such sea ice, hydrothermal vents, brines, highly polluted environments, environments under high radiation, etc..                                                                                                                                                                                                                                                                                                                                                                                                                           |
| <a href="#">FAIR</a>                       | Findable, Accessible, Interoperable, and Reusable                                                                                                                                                                                                                                                                                                                                                                                                                                                                                                                                                       |
| Field Information Management System (FIMS) | A database-based application that accepts and stores field data. Can assist the user by presenting prompts and ensuring entry of required metadata.                                                                                                                                                                                                                                                                                                                                                                                                                                                     |
| FRAM                                       | FRAM Microbial Observatory (FRontiers in Arctic marine Monitoring)                                                                                                                                                                                                                                                                                                                                                                                                                                                                                                                                      |
| Frictionless Data Packages                 | Frictionless data conforms to specific ontological and semantic standards, such as the Open Biomedical and Biological Ontologies (OBO) standards. Frictionless datasets are interoperable (can be integrated and cross-linked) with other such datasets. They can be read by humans and also parsed, searched, and processed by computer algorithms.<br><br>Ontological semantic standards are an important step towards the ability to link metagenomic and other biological data to abiotic environmental (physicochemical) datasets that provide contexts for the biological specimens/data records. |
| GBRCN                                      | Global Biological Resource Centre Network                                                                                                                                                                                                                                                                                                                                                                                                                                                                                                                                                               |
| GCM                                        | The Global Catalogue of <a href="#">Microorganisms</a> data portal.                                                                                                                                                                                                                                                                                                                                                                                                                                                                                                                                     |

|                                                    |                                                                                                                                                                                                                                                                                                                                                                                                                                                                                                                                                                                                                                                                                                                                                                                                                                                                                                                                                                                                                                                                                                                                                                                                                                                                                                                                                                                                                                                                                                                             |
|----------------------------------------------------|-----------------------------------------------------------------------------------------------------------------------------------------------------------------------------------------------------------------------------------------------------------------------------------------------------------------------------------------------------------------------------------------------------------------------------------------------------------------------------------------------------------------------------------------------------------------------------------------------------------------------------------------------------------------------------------------------------------------------------------------------------------------------------------------------------------------------------------------------------------------------------------------------------------------------------------------------------------------------------------------------------------------------------------------------------------------------------------------------------------------------------------------------------------------------------------------------------------------------------------------------------------------------------------------------------------------------------------------------------------------------------------------------------------------------------------------------------------------------------------------------------------------------------|
| genomic sample (proposed definition)               | Proposed by Astrin et al., (2013) as: "preserved sample containing (isolated or as a constituent) a high percentage of an organism's genome in widely unfragmented form. A type of molecular voucher."                                                                                                                                                                                                                                                                                                                                                                                                                                                                                                                                                                                                                                                                                                                                                                                                                                                                                                                                                                                                                                                                                                                                                                                                                                                                                                                      |
| <a href="#">GGBN</a>                               | Global Genome Biodiversity Network                                                                                                                                                                                                                                                                                                                                                                                                                                                                                                                                                                                                                                                                                                                                                                                                                                                                                                                                                                                                                                                                                                                                                                                                                                                                                                                                                                                                                                                                                          |
| genophore (proposed definition)                    | Described by Astrin et al., (2013) as: "specimen vouchers used to produce molecular (sub-)samples".                                                                                                                                                                                                                                                                                                                                                                                                                                                                                                                                                                                                                                                                                                                                                                                                                                                                                                                                                                                                                                                                                                                                                                                                                                                                                                                                                                                                                         |
| GOA-ON                                             | Global Ocean Acidification Observing Network                                                                                                                                                                                                                                                                                                                                                                                                                                                                                                                                                                                                                                                                                                                                                                                                                                                                                                                                                                                                                                                                                                                                                                                                                                                                                                                                                                                                                                                                                |
| GOODS                                              | Global Open Oceans and Deep Seabed – a classification system for species biogeography in the deep ocean (Canonico et al., 2019).                                                                                                                                                                                                                                                                                                                                                                                                                                                                                                                                                                                                                                                                                                                                                                                                                                                                                                                                                                                                                                                                                                                                                                                                                                                                                                                                                                                            |
| GOS                                                | Sorcerer II Global Ocean Sampling Expedition                                                                                                                                                                                                                                                                                                                                                                                                                                                                                                                                                                                                                                                                                                                                                                                                                                                                                                                                                                                                                                                                                                                                                                                                                                                                                                                                                                                                                                                                                |
| holistic, integrated, place-based, ecosystem-based | Studies of effects in contexts.                                                                                                                                                                                                                                                                                                                                                                                                                                                                                                                                                                                                                                                                                                                                                                                                                                                                                                                                                                                                                                                                                                                                                                                                                                                                                                                                                                                                                                                                                             |
| holobiont & core microbiome                        | <p>A "metaorganism", comprised of a host and its microbiome. Holobiont theory is a holistic way of looking at an organism, its long-term associations, and dynamic states. Often, a host has a core microbiome – a set of microbial species that can be expected to be present and may have co-evolved with the host. Their microbiomes participate in the hosts' vital functions, including adaptation, digestion, and immunity. The holobiont's microbial community can be specific to host species, genotype, location, environmental conditions, food sources, etc. Emerging research suggests that captive breeding and other active restoration programs must take microbiomes into consideration. Without the microbial community that is the natural correct match for the host and the environment, a restoration program is less likely to succeed.</p> <p>Core microbiome science is relatively new. Definitions, understanding of their presence, functions and dynamics, and the methodologies to explore and analyze core microbiomes are not yet well understood. We are inspired by Risely (2020), who views host-associated microbiomes as divided into "common core microbiome", "temporal core microbiome", "ecological core microbiome", "functional core microbiome", and "host-adapted core microbiome" to reflect the variations in the host-associated microbiome with host populations, environments, temporal cycles, and functional needs, and to inform ecological and evolutionary models.</p> |
| hologenophore (proposed definition)                | Described by Astrin et al., (2013) as: "specimen voucher from which the molecular sample is directly derived".                                                                                                                                                                                                                                                                                                                                                                                                                                                                                                                                                                                                                                                                                                                                                                                                                                                                                                                                                                                                                                                                                                                                                                                                                                                                                                                                                                                                              |
| HTS                                                | High-Throughput Sequencing                                                                                                                                                                                                                                                                                                                                                                                                                                                                                                                                                                                                                                                                                                                                                                                                                                                                                                                                                                                                                                                                                                                                                                                                                                                                                                                                                                                                                                                                                                  |
| IDA                                                | International Depository/Depository Authority – an mBRC certified to hold reference patented microbial germplasm under the Budapest Treaty. See McCluskey (2017), WIPO (2024).                                                                                                                                                                                                                                                                                                                                                                                                                                                                                                                                                                                                                                                                                                                                                                                                                                                                                                                                                                                                                                                                                                                                                                                                                                                                                                                                              |

|                                                  |                                                                                                                                                                                                                                                    |
|--------------------------------------------------|----------------------------------------------------------------------------------------------------------------------------------------------------------------------------------------------------------------------------------------------------|
| iDigBio                                          | Integrated Digitized Biocollections                                                                                                                                                                                                                |
| iDNA                                             | intracellular DNA                                                                                                                                                                                                                                  |
| INSDC                                            | International Nucleotide Sequence Database Collaboration                                                                                                                                                                                           |
| <a href="#">IGSN</a>                             | International Geo Sample Number – a globally unique identifier that can be used to link abiotic data to biosamples.                                                                                                                                |
| ITIS                                             | Integrated Taxonomic Identification System                                                                                                                                                                                                         |
| IOM                                              | Integrated Ocean Management – holistic approach to sustainable ecosystem management, balancing economic and conservation needs. When researching further, try also the "systematic conservation planning (SCP)" keywords.                          |
| IPBES                                            | Intergovernmental Science-Policy Platform on Biodiversity and Ecosystem Services                                                                                                                                                                   |
| ISBER                                            | International Society for Biological and Environmental Repositories                                                                                                                                                                                |
| isogenophore (proposed definition)               | Described by Astrin et al., (2013) as: "a different specimen with a clonal relationship to the study organism".                                                                                                                                    |
| JCDP                                             | Joint Cetacean Data Programme                                                                                                                                                                                                                      |
| Laboratory Information Management Systems (LIMS) | A database-based application that accepts and stores laboratory workflow data. Can assist the user by presenting prompts and ensuring entry of required metadata.                                                                                  |
| LN2                                              | liquid nitrogen                                                                                                                                                                                                                                    |
| macrogenetics                                    | Study of large-scale genetic patterns in data aggregated from multiple large datasets. Analyses generally compare data from multiple species across large spatiotemporal scales.                                                                   |
| Malaspina                                        | Malaspina 2010 expedition                                                                                                                                                                                                                          |
| MAT                                              | Mutually Agreed Terms                                                                                                                                                                                                                              |
| MBON                                             | Marine Biodiversity Observation Network                                                                                                                                                                                                            |
| mBRCs                                            | microbial domain Biological Resource Centers. mBRCs are culture collections that have gained certifications for quality assurance. They hold culturable and viable but non-culturable (VBNC) microorganisms and cells, and other genetic material. |
| meDNA                                            | microbial environmental DNA                                                                                                                                                                                                                        |

|                                                         |                                                                                                                                                                                                                                                                                                                                                                                                                                                                                                                                                                                                                                 |
|---------------------------------------------------------|---------------------------------------------------------------------------------------------------------------------------------------------------------------------------------------------------------------------------------------------------------------------------------------------------------------------------------------------------------------------------------------------------------------------------------------------------------------------------------------------------------------------------------------------------------------------------------------------------------------------------------|
| meta-databases, data aggregators, portals, platforms    | Digital repositories (databases) that give the user access to external datasets, cross-referenced with each other. For example, GBIF and OBIS contain data submitted by multiple other projects and databases. Through a data aggregator such as GBIF, a research project can access cetacean occurrence observations from all over the world. Another example is the MycoBank portal that allows users to see associations between academic papers and data in biodiversity databases such as GBIF. Finally, the Arctos portal gives the user access to the combined digitized catalogs of member natural history collections. |
| MGRs                                                    | MGR may stand for Marine Genetic Resources or Microbial Genetic Resources.                                                                                                                                                                                                                                                                                                                                                                                                                                                                                                                                                      |
| microbiome                                              | A multispecies community of microorganisms and their products and contexts. Includes bacteria, archaea, microeukaryotes such as yeasts, algae, and protists, viruses, mobile genetic elements such as plasmids, extracellular DNA, metabolites, inorganic molecules and gradients, etc.. The community exists in a dynamic state, with members interacting in a "theatre of activity" (Berg et al., 2020).                                                                                                                                                                                                                      |
| microbiome engineering                                  | deliberate manipulation of microbiomes, s.a. use of prebiotics and probiotics in aquaculture or the former plus fecal transplants in captive breeding programs                                                                                                                                                                                                                                                                                                                                                                                                                                                                  |
| MIMARKS                                                 | Minimum Information about a MARKer gene Sequence specification                                                                                                                                                                                                                                                                                                                                                                                                                                                                                                                                                                  |
| MIRCEN                                                  | World Federation for Culture Collections Microbial Resource Center (MIRCEN)                                                                                                                                                                                                                                                                                                                                                                                                                                                                                                                                                     |
| <a href="http://www.mirri.org">MIRRI</a>                | MIcrobial Resource Research Infrastructure ( <a href="http://www.mirri.org">www.mirri.org</a> , grant agreement no. 312251) was launched at the end of 2012.                                                                                                                                                                                                                                                                                                                                                                                                                                                                    |
| mixed microbial community / complex microbial community | A microbial sample with more than one strain. This can be a microbiome, an artificially constructed mixed culture, or an environmental sample of microbes that are in the same vicinity, but may or may not interact or be expected to be present.                                                                                                                                                                                                                                                                                                                                                                              |
| MIxS                                                    | Genome Standards Consortium's Minimum Information about Any Sequence data standard.                                                                                                                                                                                                                                                                                                                                                                                                                                                                                                                                             |
| molecular voucher (proposed definition)                 | Proposed by Astrin et al., (2013) as: "a sample that is deliberately preserved and curated in a way that will conserve its molecular properties for analysis. A molecular voucher should always be linked to a specimen voucher (which sometimes can be the same object if sufficient characters remain, see tissue voucher). Narrower terms: biobank voucher, DNA voucher, tissue voucher, RNA voucher, protein voucher, genomic sample, etc."                                                                                                                                                                                 |
| morphological voucher (proposed definition)             | Proposed by Astrin et al., (2013) as: "a specimen that allows the inspection of morphological characters." A type of specimen voucher.                                                                                                                                                                                                                                                                                                                                                                                                                                                                                          |
| MPA                                                     | Marine Protected Area                                                                                                                                                                                                                                                                                                                                                                                                                                                                                                                                                                                                           |
| MTA                                                     | Material Transfer Agreement                                                                                                                                                                                                                                                                                                                                                                                                                                                                                                                                                                                                     |
| museomics                                               | Multiomic studies of historical specimens, such as are found in museums and herbaria.                                                                                                                                                                                                                                                                                                                                                                                                                                                                                                                                           |



|                                      |                                                                                                                                                                                                                                                                                                                                                                                                                                                                                                                                                                                                                                                                                                                                                                                                                                                        |
|--------------------------------------|--------------------------------------------------------------------------------------------------------------------------------------------------------------------------------------------------------------------------------------------------------------------------------------------------------------------------------------------------------------------------------------------------------------------------------------------------------------------------------------------------------------------------------------------------------------------------------------------------------------------------------------------------------------------------------------------------------------------------------------------------------------------------------------------------------------------------------------------------------|
| mycobiome / fungal microbiome        | The microfungus taxa in a microbiome.                                                                                                                                                                                                                                                                                                                                                                                                                                                                                                                                                                                                                                                                                                                                                                                                                  |
| NASS                                 | North Atlantic Sightings Survey                                                                                                                                                                                                                                                                                                                                                                                                                                                                                                                                                                                                                                                                                                                                                                                                                        |
| NOAA                                 | National Oceanic and Atmospheric Administration (USA)                                                                                                                                                                                                                                                                                                                                                                                                                                                                                                                                                                                                                                                                                                                                                                                                  |
| NSF ADBC                             | National Science Foundation (NSF) Advancing Digitization of Biodiversity Collections (ADBC) program.                                                                                                                                                                                                                                                                                                                                                                                                                                                                                                                                                                                                                                                                                                                                                   |
| OBIS                                 | Ocean Biodiversity Information System                                                                                                                                                                                                                                                                                                                                                                                                                                                                                                                                                                                                                                                                                                                                                                                                                  |
| OECD                                 | Organisation for Economic Cooperation and Development                                                                                                                                                                                                                                                                                                                                                                                                                                                                                                                                                                                                                                                                                                                                                                                                  |
| ontology                             | Ontologies describe both the data contract and meaning in a database schema. To give an example (extremely simplified for brevity). Let's say Database 1 and Database 2 hold genetic sequences. Each record of a gene is accompanied by metadata. In Database 1, metadata is in the XML format, and dates are recorded in the YYYY-MM-DD format. In Database 2, metadata is in the JSON format, and dates are recorded in plain text, s.a. "June 25, 2025". In addition to the metadata disparities, the two databases use different definitions of the concept of a "gene". An ontology is a contract that defines the differences in the metadata format, data field requirements, and data concept definitions. Defined and compatible ontologies are needed for database integrations. For more information, see Schuurman and Leszczynski (2008). |
| OSD                                  | Ocean Sampling Day                                                                                                                                                                                                                                                                                                                                                                                                                                                                                                                                                                                                                                                                                                                                                                                                                                     |
| pan-genome / pangenome / supragenome | All gene variations within a species. In microbes, represents the combined intraspecific diversity of all strains within a clade (Morneau, 2021). Core pangenome is the combined set of genes that are present in all individuals of a species. Shell pangenome is the set of gene variants that are found in two or more strains. And cloud pangenome is the set of gene variants that are only found in one strain each.                                                                                                                                                                                                                                                                                                                                                                                                                             |
| PIC                                  | Prior Informed Consent                                                                                                                                                                                                                                                                                                                                                                                                                                                                                                                                                                                                                                                                                                                                                                                                                                 |
| PID / GUID / UUID                    | Persistent Identifier (globally unique identifier, universally unique identifier), a globally unique and permanent id that can be used to cross-reference records in diverse collections. Examples include: ARK, CETAF, DOI, IGSN, ORCID, QID, RRID, URL. Keeping such IDs permanent across the generations of databases and standards is a challenge. Notably, location-dependent IDs such as URLs may not be suitable (Elliott et al., 2020).                                                                                                                                                                                                                                                                                                                                                                                                        |
| PANGAEA                              | <a href="#">PANGAEA</a> data portal for Earth & Environmental Science                                                                                                                                                                                                                                                                                                                                                                                                                                                                                                                                                                                                                                                                                                                                                                                  |
| Pangeo                               | The <a href="#">Pangeo</a> project helps scientists find and learn software and computing infrastructures.                                                                                                                                                                                                                                                                                                                                                                                                                                                                                                                                                                                                                                                                                                                                             |
| paragenophore (proposed definition)  | Described by Astrin et al., (2013) as: "a putatively conspecific specimen voucher collected together with the 'molecular' specimen".                                                                                                                                                                                                                                                                                                                                                                                                                                                                                                                                                                                                                                                                                                                   |

|                                                  |                                                                                                                                                                                                                                                                                                                                                                                                                                                                                                                                                                                                                                                                                                                                                                                                                                                                                                                                                                                                                                                                                                                                                                                                                                                                                                                                                                                                                                                                                                                                                                                                                                                         |
|--------------------------------------------------|---------------------------------------------------------------------------------------------------------------------------------------------------------------------------------------------------------------------------------------------------------------------------------------------------------------------------------------------------------------------------------------------------------------------------------------------------------------------------------------------------------------------------------------------------------------------------------------------------------------------------------------------------------------------------------------------------------------------------------------------------------------------------------------------------------------------------------------------------------------------------------------------------------------------------------------------------------------------------------------------------------------------------------------------------------------------------------------------------------------------------------------------------------------------------------------------------------------------------------------------------------------------------------------------------------------------------------------------------------------------------------------------------------------------------------------------------------------------------------------------------------------------------------------------------------------------------------------------------------------------------------------------------------|
| planktonic                                       | Free-living (as opposed to sessile).                                                                                                                                                                                                                                                                                                                                                                                                                                                                                                                                                                                                                                                                                                                                                                                                                                                                                                                                                                                                                                                                                                                                                                                                                                                                                                                                                                                                                                                                                                                                                                                                                    |
| PMA Live/Dead stain (viability dye)              | <p>Propidium monoazide, a permanent DNA- and RNA-intercalating dye that does not cross cell membranes (is membrane-impermeant) (Emerson et al., 2017). PMA is used to exclude extracellular DNA (such as relic DNA, contaminants, DNA from lysed cells, plasmids, EPS matrix components, etc.) from downstream amplification (techniques tried with PMA include: PCR, LAMP, SMRT, 16S rRNA gene amplicon sequencing, microarrays, microfluidics, etc.). PMA needs to be photoactivated with exposure to UV light (or a strong near-UV/white light). Once photoactivated, PMA forms permanent covalent bonds with the nucleic acids in the DNA or RNA strand, thus "locking" the strand. PMA can be used with bacteria, archaea, viruses, and eukaryotes. Samples can be PMA-pretreated in the field. PMA has also been used on Arctic and Antarctic samples and in aquatic studies (Abdullah Al et al., 2024; Burot et al., 2021; Yun et al., 2023). It should be noted that its effects may not be uniform under certain conditions, and techniques may need to account for turbidity, variability of light sources, and variable responses between taxa (Heise et al., 2016; Joo et al., 2019; Knight et al., 2018; Okada et al., 2022; Wang et al., 2021).</p> <p>Before propidium monoazide gained use, microbiologists used the ethidium monoazide and propidium iodide dyes. Ethidium monoazide is more toxic than propidium monoazide. It is also less reliable – ethidium monoazide has a higher rate of the dye itself damaging cell membranes and entering cells. Propidium iodide is not permanent and will not block PCR amplification.</p> |
| Precautionary Principle / precautionary approach | Established by international agreement at the Convention on Biological Diversity (CBD), the <a href="#">Principle</a> states: "where there is a threat of significant reduction or loss of biological diversity, lack of full scientific certainty should not be used as a reason for postponing measures to avoid or minimize such a threat." The precautionary approach is the idea that, in the absence of scientific certainty, policymakers and administrators should choose the conservation-forward approach.                                                                                                                                                                                                                                                                                                                                                                                                                                                                                                                                                                                                                                                                                                                                                                                                                                                                                                                                                                                                                                                                                                                                    |
| preproducibility                                 | Proposed by Stark (2018), preproducibility is a set of guidelines for communicating experimental processes, including specimen provenance, storage, and handling, tools, raw and processed data, and written code. Preproducibility guidelines set up the necessary contexts for reproducible research.                                                                                                                                                                                                                                                                                                                                                                                                                                                                                                                                                                                                                                                                                                                                                                                                                                                                                                                                                                                                                                                                                                                                                                                                                                                                                                                                                 |
| progenophore (proposed definition)               | Described by Astrin et al., (2013) as: "a voucher that is linked to the specimen sampled for molecular analysis by a parent-descendant or sibling relationship".                                                                                                                                                                                                                                                                                                                                                                                                                                                                                                                                                                                                                                                                                                                                                                                                                                                                                                                                                                                                                                                                                                                                                                                                                                                                                                                                                                                                                                                                                        |
| psychrophilic                                    | An organism that is adapted to cold temperatures.                                                                                                                                                                                                                                                                                                                                                                                                                                                                                                                                                                                                                                                                                                                                                                                                                                                                                                                                                                                                                                                                                                                                                                                                                                                                                                                                                                                                                                                                                                                                                                                                       |
| RRID                                             | Similar to a DOI, an RRID is a globally unique identifier that can be attached to persons, datasets, published works, etc. No single identification method has yet been agreed on in the context of biobanking.                                                                                                                                                                                                                                                                                                                                                                                                                                                                                                                                                                                                                                                                                                                                                                                                                                                                                                                                                                                                                                                                                                                                                                                                                                                                                                                                                                                                                                         |
| ROI                                              | Returns On Investment – the profit or benefit from an invested sum                                                                                                                                                                                                                                                                                                                                                                                                                                                                                                                                                                                                                                                                                                                                                                                                                                                                                                                                                                                                                                                                                                                                                                                                                                                                                                                                                                                                                                                                                                                                                                                      |
| SEANOE                                           | SEA scieNtific Open data Edition – marine science <a href="#">open data</a> repository offering citations tracking.                                                                                                                                                                                                                                                                                                                                                                                                                                                                                                                                                                                                                                                                                                                                                                                                                                                                                                                                                                                                                                                                                                                                                                                                                                                                                                                                                                                                                                                                                                                                     |
| SOI                                              | Schmidt Ocean Institute                                                                                                                                                                                                                                                                                                                                                                                                                                                                                                                                                                                                                                                                                                                                                                                                                                                                                                                                                                                                                                                                                                                                                                                                                                                                                                                                                                                                                                                                                                                                                                                                                                 |

|                                      |                                                                                                                                                                                                                                                                                                                                                                                                                                                                                                                                                                                                                                                   |
|--------------------------------------|---------------------------------------------------------------------------------------------------------------------------------------------------------------------------------------------------------------------------------------------------------------------------------------------------------------------------------------------------------------------------------------------------------------------------------------------------------------------------------------------------------------------------------------------------------------------------------------------------------------------------------------------------|
| syngenophore (proposed definition)   | Described by Astrin et al., (2013) as: "a putatively conspecific specimen voucher" "collected at another place or time" from the original 'molecular' specimen.                                                                                                                                                                                                                                                                                                                                                                                                                                                                                   |
| Tara Oceans                          | Tara Oceans Expedition                                                                                                                                                                                                                                                                                                                                                                                                                                                                                                                                                                                                                            |
| TDWG                                 | Biodiversity Information Standards                                                                                                                                                                                                                                                                                                                                                                                                                                                                                                                                                                                                                |
| TK / TEK                             | Traditional Knowledge / Traditional Ecological Knowledge                                                                                                                                                                                                                                                                                                                                                                                                                                                                                                                                                                                          |
| tissue voucher (proposed definition) | Proposed by Astrin et al., (2013) as: "tissue subsampled from a specimen - or the entire specimen -, preserved (usu. frozen) to keep its molecular properties (either fixed tissue or viable cells) for future analysis." A type of molecular voucher.                                                                                                                                                                                                                                                                                                                                                                                            |
| TOP                                  | Transparency and Openness Promotion guidelines                                                                                                                                                                                                                                                                                                                                                                                                                                                                                                                                                                                                    |
| traceability                         | Specimens, observations, and research products are traceable when it's possible to determine the item's full history, from collection to present time. A full history includes: <ul style="list-style-type: none"> <li>- Location, date, time, and circumstances of collection.</li> <li>- Protocols for preparation, storage, transformations, etc..</li> <li>- Usage in projects, publications, etc., both primary and derivative.</li> <li>- Contributors (local, academic, and industry) to each step.</li> </ul>                                                                                                                             |
| TREC                                 | Traversing European Coastlines Expedition                                                                                                                                                                                                                                                                                                                                                                                                                                                                                                                                                                                                         |
| type specimen                        | A type specimen is a vouchered reference specimen that is used to describe a new taxon (usually a species). Type specimens are only collected once per species (and thereafter define that species).                                                                                                                                                                                                                                                                                                                                                                                                                                              |
| URI                                  | Uniform Resource Identifier. URI, DOI, RRID, ORCID – each provides a way to identify something, uniquely and permanently across global databases. No single identification method has yet been chosen in the context of biobanking.                                                                                                                                                                                                                                                                                                                                                                                                               |
| virome                               | The viral portion of a microbiome.                                                                                                                                                                                                                                                                                                                                                                                                                                                                                                                                                                                                                |
| voucher / vouchered specimen         | A vouchered specimen is the original collected material, well documented to ensure traceability and reproducibility. Vouchers are also sometimes called reference specimens. Unlike type specimens, vouchers are collected in the course of a project, and there can be multiple vouchers per species. Vouchers provide evidence of biodiversity existing at a specific location at a specific time. They can be used to study intraspecies diversity (microdiversity). Vouchers accessioned into a biorepository can be reexamined to verify original study results, answer new questions, or produce fresh analyses with evolving technologies. |
| WDCM                                 | World Data Centre for Microorganisms – the data center for WFCC and MIRCEN                                                                                                                                                                                                                                                                                                                                                                                                                                                                                                                                                                        |
| WFCC                                 | World Federation for Culture Collections                                                                                                                                                                                                                                                                                                                                                                                                                                                                                                                                                                                                          |

|        |                                             |
|--------|---------------------------------------------|
| WHO    | World Health Organization                   |
| WIPO   | World Intellectual Property Organisation    |
| WoRDSS | World Register of Deep-Sea Species          |
| WRIMS  | World Register of Introduced Marine Species |
| WoRMS  | World Register of Marine Species            |

## Microbiome Cryopreservation Starter Terminology

[Back To Table Of Contents](#)

### Search keywords we found to be helpful in our searches of literature

Cryobanking terminology is a rich tapestry and a search engine nightmare – academic papers use a wide array of terms for the different types of samples, biobanks, and procedures. A search for "marine biobanking" may miss literature on "biorepositories". A search for "microbiome cryopreservation" may miss literature on cryopreservation of raw substrates or mixed microbial communities. Additionally, "microbiome" is often used to refer to just the bacterial portion, making searches for literature on the cryopreservation of novel taxa a challenge. The list of keywords below may help the reader find the literature they need.

microbiome-related keywords: archaeome, bacteriome, co-cultures, complex community, dynamic community, enrichment cultures, environmental microbiome, environmental matrices, environmental sample, epibiome, eukaryome, fungome, holobiont, intact communities, intact microbiome, intact microbiome, metacommunity, microbial consortia, microbial matrix, microbial seedbank/seed bank, microbiome, mixed culture, (mixed) microbial community, mixed sample, mycome, natural communities, non-pure culture, (preserving) community structure and functionality, raw/intact substrate, virome, whole microbiome

cryopreservation-related keywords: chilling, cryobanking, cryoconservation, cryodamage, cryofacility, cryogene bank, cryogenic biorepositories, cryogenic/ultra-low temperatures, cryoinjury, cryopreservation, cryoprotectant, cryo-recalcitrant, cryorepository, isobaric vitrification, isochoric vitrification, freezing, liquid nitrogen, liquid nitrogen gas phase, liquid nitrogen vapor phase, osmotic shock, snap freeze, super-chilling, thawing, thermal shock, toxic shock, vitrification, warming

biobanking-related keywords: accession, active restoration, assisted reproduction, biobank, biological resource centers (BRCs), biocollection, biorepository, biospecimen repository, deaccession, deposit, genetic resources, germplasm, germplasm bank, living collections, living microbiome (collections), natural history collection

## Expeditions, Observatories, and Cooperative Fieldwork Projects

[Back To Table Of Contents](#)

| Name                                                                                        | Description                                                                                                                                                                                                                                                                                                                                                                                                                                                                                                                                                        | Citations                                                                                                      |
|---------------------------------------------------------------------------------------------|--------------------------------------------------------------------------------------------------------------------------------------------------------------------------------------------------------------------------------------------------------------------------------------------------------------------------------------------------------------------------------------------------------------------------------------------------------------------------------------------------------------------------------------------------------------------|----------------------------------------------------------------------------------------------------------------|
| ArcticCBM Atlas                                                                             | The ArcticCBM Atlas holds an inventory of community-based monitoring (CBM) and Indigenous Knowledge (IK) projects and initiatives in the circumpolar Arctic. The Atlas is a valuable resource for researchers looking to connect with local communities.                                                                                                                                                                                                                                                                                                           | (Johnson et al., 2016)                                                                                         |
| Association of European Marine Biological Laboratories Expanded (ASSEMBLE+ / ASSEMBLE Plus) | An EMBRC-ERIC-led initiative, ASSEMBLE+ is an international consortium of organizations. The project gives scientists access to 30 marine observatories, services, resources, and education. It promotes Open Research and FAIR data. ASSEMBLE+ has coordinated Ocean Sampling Day since 2018. The Cryobanking Research Activity within the project seeks to develop standardized and reproducible cryopreservation protocols for marine macro- and microorganisms. As of 2019, the project has identified cryopreservation methods for over 200 species of algae. | (Assemble+, n.d.; Cryobanking Marine Organisms (JRA2)   Assemble+, n.d.; Ocean Sampling Day   Assemble+, n.d.) |
| Bio-GO-SHIP ( <a href="https://biogoship.org/">https://biogoship.org/</a> )                 | Bio-GO-SHIP is part of the GO-SHIP (Global Ocean Ship-based Hydrographic Investigations Program) initiative. Its goals include: <ul style="list-style-type: none"> <li>- Increasing coverage and consistency of marine planktonic community observations.</li> <li>- Developing and reaching international consensus on standards for observation and collection protocols.</li> <li>- Reconciling EOv protocols and making it easier to integrate biological and abiotic (temperature, pH, etc.) datasets.</li> </ul>                                             | (Clayton et al., 2022)                                                                                         |
| Census of Marine Life (CoML)                                                                | A ten-year project with scientists from over 70 nations joining forces to collect, document, cross-reference, and analyze historical records and samples and specimens of marine biodiversity.                                                                                                                                                                                                                                                                                                                                                                     | (Anderson, 2006)                                                                                               |
| Coastal Observing System for Northern and Arctic Seas (COSYNA)                              | Two remotely-operated cabled observatories, available for (assisted) public use. Located in shallow waters off the coast of Svalbard, Norway.                                                                                                                                                                                                                                                                                                                                                                                                                      | (Fischer et al., 2020)                                                                                         |
| Earth Microbiome Project (EMP)                                                              | EMP acquired 200,000 samples of environmental microbiomes, donated by researchers around the world. Researchers designed standardized protocols for sample collection and requested accompanying metadata in a standardized format. The donations were from around 100 separate studies. The EMP collection covered microbial genetic and functional diversity from a wide range of ecosystems, including marine environments.                                                                                                                                     | (Gilbert et al., 2014; Thompson et al., 2017)                                                                  |
| Fram Observatory                                                                            | An autonomous platform for continuous remote observation of Arctic microbial communities.                                                                                                                                                                                                                                                                                                                                                                                                                                                                          | (Fadeev et al., 2021; Gilbertson et al., 2022)                                                                 |

|                                                                                                                                                                 |                                                                                                                                                                                                                                                                                                                                                                                                                                                                                                                    |                                                                                                                                |
|-----------------------------------------------------------------------------------------------------------------------------------------------------------------|--------------------------------------------------------------------------------------------------------------------------------------------------------------------------------------------------------------------------------------------------------------------------------------------------------------------------------------------------------------------------------------------------------------------------------------------------------------------------------------------------------------------|--------------------------------------------------------------------------------------------------------------------------------|
| Global Ocean Acidification Observing Network (GOA-ON)                                                                                                           | Primarily records abiotic (physical and chemical) variables. Is not fully integrated with MBON.                                                                                                                                                                                                                                                                                                                                                                                                                    |                                                                                                                                |
| Greenland Integrated Observing System (GIOS) ( <a href="https://gios.org/">https://gios.org/</a> )                                                              | A network of remote sensing installations, measuring abiotic environmental data in Greenland.                                                                                                                                                                                                                                                                                                                                                                                                                      |                                                                                                                                |
| Malaspina 2010 Circumnavigation Expedition                                                                                                                      | A six-year expedition project. Several dozen multi-disciplinary research groups performed studies of marine macro- and micro-organisms.                                                                                                                                                                                                                                                                                                                                                                            | (Acinas et al., 2021; Catalá et al., 2015; Duarte, 2015; Laiolo et al., 2024)                                                  |
| Multidisciplinary drifting Observatory for the Study of Arctic Climate (MOSAIC) ( <a href="https://mosaic-expedition.org/">https://mosaic-expedition.org/</a> ) | A remote observatory capable of recording microbial eDNA over large geographic areas and long time periods.                                                                                                                                                                                                                                                                                                                                                                                                        | (Gilbertson et al., 2022; Mock et al., 2022)                                                                                   |
| North Atlantic Sightings Survey (NASS)                                                                                                                          | Six multi-national cetacean survey cruises, conducted between 1987 and 2015.                                                                                                                                                                                                                                                                                                                                                                                                                                       | (NAMMCO, 2019)                                                                                                                 |
| Ocean Census Expeditions ( <a href="https://oceanconsensus.org/expeditions/">https://oceanconsensus.org/expeditions/</a> )                                      | An international alliance that funds, co-organizes, and contributes technology to marine science expeditions. Hosts specialist scientists. Serves both academic institution and citizen science projects.                                                                                                                                                                                                                                                                                                          | (Ocean Census, n.d.)                                                                                                           |
| Ocean Sampling Day (OSD) ( <a href="https://www.microb3.eu/osd.html">https://www.microb3.eu/osd.html</a> )                                                      | Initiated under the aegis of the Micro B3 (Marine Microbial Biodiversity, Bioinformatics, Biotechnology) project, OSD was a massively parallel citizen science initiative. Professional researchers and ocean-going members of the public were asked to simultaneously collect seawater samples in over a hundred locations worldwide. Collection protocols were standardized, and metadata included environmental variables. Collected samples were sequenced, generating a large standardized microbial dataset. | (Canonico et al., 2019; Kopf et al., 2015; Laiolo et al., 2024; Ocean Sampling Day   Assemble+, n.d.; ten Hoopen et al., 2015) |
| PARASITE                                                                                                                                                        | The PARASITE project links preserved specimens of marine macrofauna, associated parasites, host omic sequences and associated microbial metagenomes, and field observations for integrated genes-to-ecosystems modeling.                                                                                                                                                                                                                                                                                           | (González et al., 2018)                                                                                                        |
| Schmidt Ocean Institute Cruises (SOI)                                                                                                                           | SOI's ships Falkor (former) and Falkor (too) (current vessel) act as scientific platforms for diverse groups of marine researchers, students, and artists. ROV SuBastian gives researchers access to the sea floor.                                                                                                                                                                                                                                                                                                | (Gauthier et al., 2021; Schmidt, n.d.)                                                                                         |

|                                                                                                                                          |                                                                                                                                                                                                                                                                                                               |                                                                                            |
|------------------------------------------------------------------------------------------------------------------------------------------|---------------------------------------------------------------------------------------------------------------------------------------------------------------------------------------------------------------------------------------------------------------------------------------------------------------|--------------------------------------------------------------------------------------------|
| Sea of Change                                                                                                                            | The Sea of Change project sampled and sequenced microeukaryotes, including microalgae, at a pole-to-pole scale. The results showed unique algal adaptations to polar conditions.                                                                                                                              | (Gilbertson et al., 2022)                                                                  |
| Sorcerer II Global Ocean Sampling (GOS) Expedition ( <a href="https://www.jcvi.org/research/gos">https://www.jcvi.org/research/gos</a> ) | A Venter Institute circumnavigation expedition, focusing on studies of marine plankton. Instrumental in the development of omics standards for ocean monitoring.                                                                                                                                              | (Canonico et al., 2019; Laiolo et al., 2024; Nissimov et al., 2022; Rusch et al., 2007)    |
| Svalbard Integrated Arctic Earth Observing System (SIOS) ( <a href="https://sios-svalbard.org/">https://sios-svalbard.org/</a> )         | An international remote sensing observatory, focusing on Earth Science-related abiotic measurements.                                                                                                                                                                                                          |                                                                                            |
| Tara Oceans Expedition ( <a href="https://fondationtaraocean.org/en/home/">https://fondationtaraocean.org/en/home/</a> )                 | A scientist-led cruise expedition organized by a multidisciplinary consortium of research teams. Tara Oceans takes a holistic view of marine studies, hosting projects in disciplines ranging from meteorology to microbial ecology. Instrumental in the development of omics standards for ocean monitoring. | (Canonico et al., 2019; Karsenti et al., 2011; Laiolo et al., 2024; Nissimov et al., 2022) |
| Traversing European Coastlines (TREC)                                                                                                    | A cruise expedition around European coastlines, with the goal of exploring microbiological responses to environmental changes in microbial communities and select marine organisms.                                                                                                                           | (EMBL, 2024)                                                                               |

## Biorepositories and Biorepository Networks

[Back To Table Of Contents](#)

For more listings of species identification and occurrence databases, specimen and culture repositories, and repository networks see: Bakker et al. (2020), Boundy-Mills et al. (2020), Chaplow et al. (2021), Corrales and Astrin (2023), Debode et al. (2024), Grenié et al. (2023), Lobanov et al. (2022), Marigomez and Lekube (2017), Martínez-Páramo et al. (2017), McCluskey (2017), Smith et al. (2014), Stephenson (2021).

| Name                                                                                                                                                   | Description                                                                                                                                                                                              | Citations                                                       |
|--------------------------------------------------------------------------------------------------------------------------------------------------------|----------------------------------------------------------------------------------------------------------------------------------------------------------------------------------------------------------|-----------------------------------------------------------------|
| Ambrose Monell Cryo Collection ( <a href="#">AMCC</a> )                                                                                                | The AMCC cryorepository at the American Museum of Natural History holds and lends tissue samples, provides equipment and expertise, and advances biodiversity cryopreservation standards.                | (Corthals and Desalle, 2005)                                    |
| American Type Culture Collection (ATCC)                                                                                                                | ATCC holds strains of over 7600 species of bacteria, fungi, and yeasts. It is ISO-certified to distribute microbial reference cultures, and serves as an International Depository Authority.             | (McCluskey, 2017)                                               |
| Antarctic Environmental Specimen Bank (BCAA)                                                                                                           | Part of the International Specimen Bank (IESBs) network, BCAA collects specimens for analyses of environmental pollutants.                                                                               | (University of Genoa, n.d.)                                     |
| Arctic Biodiversity Data Service (ABDS)                                                                                                                | An online platform for collection and searches of data on biodiversity in the Arctic, featuring an open API and georeferenced datasets.                                                                  | (Arctic Biodiversity Data Service, n.d.)                        |
| Arctos ( <a href="https://arctosdb.org/">https://arctosdb.org/</a> ) ( <a href="https://arctos.database.museum/">https://arctos.database.museum/</a> ) | A consortium of 236 natural history collections, focusing on universities and museums. Arctos also provides tools and training, and offers a public data portal.                                         | (Arctos, n.d.)                                                  |
| ARS Culture Collection (NRRL)                                                                                                                          | One of the oldest and largest collections of microbial organisms, with almost 100,000 isolates of bacteria and fungi. Provides "lending" services. Is an IDA. Does not have assured sustainable funding. | (Boundy-Mills et al., 2020; McCluskey, 2017)                    |
| Biodiversity Collections Network (BCoN) ( <a href="https://bcon.aibs.org/">https://bcon.aibs.org/</a> )                                                | BCoN promotes the development of a US Extended Specimen Network infrastructure. Its overarching goals are to advance the expansion and connectivity of US biological collections.                        | (Biodiversity Collections Network, n.d.; Lendemer et al., 2020) |
| biobanking.org ( <a href="https://biobanking.org/locator">https://biobanking.org/locator</a> )                                                         | Hosts a searchable database of biobanks (mostly medical).                                                                                                                                                |                                                                 |



|                                                                                                                                                                                                   |                                                                                                                                                                                                                                                                                                                                                                                                                                                                                                                                                                                       |                                                                                  |
|---------------------------------------------------------------------------------------------------------------------------------------------------------------------------------------------------|---------------------------------------------------------------------------------------------------------------------------------------------------------------------------------------------------------------------------------------------------------------------------------------------------------------------------------------------------------------------------------------------------------------------------------------------------------------------------------------------------------------------------------------------------------------------------------------|----------------------------------------------------------------------------------|
| <p>Biobanking and Biomolecular Resources Research Infrastructure (BBMRI) (BBMRI-ERIC) (<a href="https://directory.bbmri-eric.eu/#/catalogue">https://directory.bbmri-eric.eu/#/catalogue</a>)</p> | <p>BBMRI (Biobanking and Biomolecular Resources Research Infrastructure) is an EU biobank network, focused on medicine. The network maintains a <a href="#">searchable directory</a> of the names and contact details of EU biobanks that are open to service requests. Most members are medical biobanks.</p>                                                                                                                                                                                                                                                                        | <p>(Holub et al., 2016; Ryan et al., 2021)</p>                                   |
| <p>Biodiversity Information Standards (TDWG)</p>                                                                                                                                                  | <p>A non-profit organization working to improve global biodiversity information management. Develops data standards, including Darwin Core (DwC).</p>                                                                                                                                                                                                                                                                                                                                                                                                                                 | <p>(Collins, J. E., 2021; TDWG, n.d.)</p>                                        |
| <p>Bionomia (<a href="https://bionomia.net/">https://bionomia.net/</a>)</p>                                                                                                                       | <p>A citizen science effort to retroactively give attributions to those who have contributed to natural history collections. The project identifies contributors to accessioned specimens and annotations, and enters their names into linked databases. The project goals are to incentivize biobanking curation and annotations, and to help fund and value those collections by giving incentives.</p>                                                                                                                                                                             | <p>(Bionomia, n.d.; Mabry et al., 2022)</p>                                      |
| <p>BirdLife International Seabird Tracking Database (<a href="http://www.seabirdtracking.org/">http://www.seabirdtracking.org/</a>)</p>                                                           | <p>A large database of seabird data. Open submissions are welcomed and checked by curators. Submitted data is owned and controlled by the submitter. The project mission is to enable conservation and research collaborations.</p>                                                                                                                                                                                                                                                                                                                                                   | <p>(Bernard et al., 2021; BirdLife International, 2023; Davies et al., 2021)</p> |
| <p>CABI (<a href="https://www.cabi.org/">https://www.cabi.org/</a>)</p>                                                                                                                           | <p>CABI is an international non-profit organization, dedicated to agricultural and environmental research. Among other activities, CABI conducts research on cryopreservation of environmental microbiomes, focusing on the microbiomes of plants of agricultural significance.</p>                                                                                                                                                                                                                                                                                                   | <p>(Ryan et al., 2023; Smith et al., 2020)</p>                                   |
| <p>CCryo Culture Collection of Cryophilic Algae</p>                                                                                                                                               | <p>Houses hundreds of strains of microalgae from polar environments.</p>                                                                                                                                                                                                                                                                                                                                                                                                                                                                                                              | <p>(Leya, 2022)</p>                                                              |
| <p>Common Access to Biological Resources and Information (CABRI) (<a href="http://www.cabri.org/">http://www.cabri.org/</a>)</p>                                                                  | <p>The CABRI network provides a search portal to 28 partner collections, including CABI, DSMZ, and ECCO. The collections hold about half of Europe's biobanked resources. With partners that include some of the largest mBRCs in the world, CABRI-associated collections hold more than 150,000 specimens (about half of public deposits in Europe), and cover cell lines, prokaryote and eukaryote cultures, plasmids, and viruses. Cultures can be requested for research. The CABRI portal combines the disparate catalogues of member collections into a searchable product.</p> | <p>(Becker et al., 2019; Romano et al., 2005a; Romano et al., 2005b)</p>         |
| <p>CryoArks (<a href="https://www.cryoarks.org/">https://www.cryoarks.org/</a>)</p>                                                                                                               | <p>CryoArks is a UK-based consortium of cryorepositories dedicated to biodiversity conservation. CryoArks partners and affiliates include: Cardiff University, the Natural History Museum of London, National Museums of Scotland, the Royal Zoological Society of Scotland, University of Nottingham, The University of Edinburgh, the Frozen Ark, the European Association of Zoos and Aquaria (EAZA),</p>                                                                                                                                                                          | <p>(Leigh et al., 2021; Pérez-Espona, 2021)</p>                                  |

|                                                                                                                                                                                              |                                                                                                                                                                                                                                                                                                                                                                                                                                                                                                                                                                                                                                                                                                                                         |                                                                              |
|----------------------------------------------------------------------------------------------------------------------------------------------------------------------------------------------|-----------------------------------------------------------------------------------------------------------------------------------------------------------------------------------------------------------------------------------------------------------------------------------------------------------------------------------------------------------------------------------------------------------------------------------------------------------------------------------------------------------------------------------------------------------------------------------------------------------------------------------------------------------------------------------------------------------------------------------------|------------------------------------------------------------------------------|
|                                                                                                                                                                                              | <p>the Global Genome Biobanking Network (GGBN), and the CRYOSOCIETIES initiative. One notable CryoArks collection is the Abyssline Deep Sea Collection.</p> <p>CryoArks coordinates specimen donations and maintains an online portal database. Researchers can submit sample requests through the portal.</p>                                                                                                                                                                                                                                                                                                                                                                                                                          |                                                                              |
| Distributed System of Scientific Collections (DiSSCo)                                                                                                                                        | <p>Connects museums, botanic gardens, and universities across 23 countries in the European Union. Works to harmonize curation and data management practices.</p>                                                                                                                                                                                                                                                                                                                                                                                                                                                                                                                                                                        | (Collins J.E. et al., 2021; Distributed System, n.d.; Hardisty et al., 2022) |
| European Association of Zoos and Aquaria Biobank (EAZA)<br>( <a href="https://www.eaza.net/conservation/research/eaza-biobank">https://www.eaza.net/conservation/research/eaza-biobank</a> ) | <p>The EAZA network is dedicated to cryobanking gametes and stem cells of threatened species in zoos and aquaria. The network has members across Europe and in the Middle East. Cryocollections are hosted by the Antwerp Zoo, the Royal Zoological Society of Scotland Edinburgh Zoo, the Institute for Zoo and Wildlife Research, and the Copenhagen Zoo. Collections are expected to be used towards improving genetic diversity in captive breeding programs and towards conservation research. EAZA has set cryopreservation of aquatic species as a priority and has presented a strategy for aquarium biobanking. The organization has also developed standardized protocols for collection of samples from aquatic species.</p> | (EAZA, 2024; Pérez-Espona, 2021)                                             |
| European Blue Biobank (EBB)                                                                                                                                                                  | <p>EBB is a consortium initiative under the aegis of EMBRC-ERIC. Its goal is to unite marine biobanks in France, Ireland, Portugal, Spain, UK, and Norway, coordinate ABS infrastructures, facilitate access to collections, develop tools and methods, and educate stakeholders. The EBB project started in 2017, with the final meeting in 2023. The project was the first transnational initiative to coordinate marine biobanks. In 2023, the Marine Research Centre (CIM) of the University of Vigo obtained funding to relaunch and continue the project.</p>                                                                                                                                                                     | (CIM-UVIGO, 2023; EBB, 2024; EMBRC, 2020)                                    |
| European Culture Collections' Organisation (ECCO)<br>( <a href="http://www.eccosite.org">www.eccosite.org</a> )                                                                              | <p>ECCO promotes collaboration and innovation between member mBRCs. Members include non-profit as well as corporate collections from 24 European countries. Aggregated member collections hold over 350,000 specimens.</p>                                                                                                                                                                                                                                                                                                                                                                                                                                                                                                              | (ECCO, n.d.)                                                                 |
| European Marine Biological Resources Centre (EMBRC)                                                                                                                                          | <p>The MIRRI and the EMBRC infrastructures are products of the European Commission's Open Data Strategy for Europe. The networks' mission is to ensure that public-financed data is publicly available, and generated collections can be used towards innovation. Among other functions, EMBRC coordinates marine stations and sponsors large collaborative field expeditions.</p>                                                                                                                                                                                                                                                                                                                                                      | (Rotter et al., 2021)                                                        |
| European, Middle Eastern, and African Society for Biopreservation and Biobanking (ESBB)                                                                                                      | <p>Regional biobank network.</p>                                                                                                                                                                                                                                                                                                                                                                                                                                                                                                                                                                                                                                                                                                        | (Ryan et al., 2021)                                                          |

|                                                                                                                                                          |                                                                                                                                                                                                                                                                                               |                                                                                  |
|----------------------------------------------------------------------------------------------------------------------------------------------------------|-----------------------------------------------------------------------------------------------------------------------------------------------------------------------------------------------------------------------------------------------------------------------------------------------|----------------------------------------------------------------------------------|
| European Molecular Biology Laboratory (EMBL)<br>( <a href="https://www.embl.org/">https://www.embl.org/</a> )                                            | An intergovernmental organization with 29 member states. EMBL creates databases and software tools for the biobanking industry, runs training programs, and provides life sciences services.                                                                                                  |                                                                                  |
| FishBase<br>( <a href="https://fishbase.org/">https://fishbase.org/</a> )                                                                                | Created in the 1980ies, FishBase is now a global network of information databases, and has been cited over 10,000 times in academic literature over its lifetime. FishBase focuses on finfishes, and contains information on 33,000 species. It also hosts a sightings reporting application. | (Canonico et al., 2019; Humphries et al., 2023)                                  |
| Frozen Ark Project<br>( <a href="https://www.frozenark.org/">https://www.frozenark.org/</a> )                                                            | In collaboration with zoos, aquaria, museums, and academia, the Frozen Ark cryopreserves the germplasm of threatened animal species. The project mission is to collect and store somatic cells, gametes, and embryos, to be used to enrich genetic diversity in captive breeding programs.    | (Clarke, 2009; Pérez-Espona, 2021)                                               |
| Frozen Zoo®<br>( <a href="https://science.sandiegozoo.org/resources/frozen-zoo-%C2%AE">https://science.sandiegozoo.org/resources/frozen-zoo-%C2%AE</a> ) | The San Diego Zoo Wildlife Alliance Frozen Zoo® collection contains germplasm of nearly 1,000 taxa. The collection is backed up to a secondary site. The Alliance has set restoration and rescue of threatened, endangered, and even extinct species as its goal.                             | (Mooney et al., 2023; Pérez-Espona, 2021; San Diego Zoo Wildlife Alliance, 2024) |
| GenBank<br>( <a href="https://www.ncbi.nlm.nih.gov/genbank/">https://www.ncbi.nlm.nih.gov/genbank/</a> )                                                 | A genetic sequence database run by the US National Center for Biotechnology Information (NCBI). GenBank is not curated – a proportion of the sequences it contains are annotated with erroneous taxonomic assignments.                                                                        | (Debode et al., 2024; GenBank Overview, n.d.)                                    |
| Global Biodiversity Information Facility (GBIF)                                                                                                          | The leading meta-database of species occurrence data. GBIF governance and funding are secured through inter-governmental partnerships.                                                                                                                                                        | (Costello et al., 2013; GBIF, n.d.)                                              |
| Global Catalogue of Microorganisms (GCM)<br>( <a href="https://gcm.wdcm.org/">https://gcm.wdcm.org/</a> )                                                | GCM is a data portal into the inventories of 153 microbial culture collections around the world.                                                                                                                                                                                              |                                                                                  |
| Global Genome Biodiversity Network (GGBN)<br>( <a href="https://www.ggbn.org/ggbn_portal/">https://www.ggbn.org/ggbn_portal/</a> )                       | An international network of biorepositories dedicated to non-human biodiversity. The GGBN Data Portal provides public access to digitized collections from 23 countries (and counting). GGBN includes the DNA Bank Network - a public portal to DNA samples of micro- and macro-organisms.    | (Collins J.E. et al., 2021; Global Genome, n.d.)                                 |
| Global Natural Products Social Molecular Networking (GNPS)                                                                                               | A crowd-sourced platform for metabolomics analyses that harmonizes microbiome datasets.                                                                                                                                                                                                       | (Biteen et al., 2016)                                                            |
| Integrated Digitized Biocollections (iDigBio)<br>( <a href="https://www.idigbio.org/">https://www.idigbio.org/</a> )                                     | iDigBio is a data aggregator. It is supported by the US National Resource for Advancing Digitization of Biodiversity Collections (ADBC) initiative, funded by the US National Science Foundation.                                                                                             | (Elliott et al., 2020; Lendemer et al., 2020; Mabry et al., 2022)                |

|                                                                                                                                                  |                                                                                                                                                                                                                                                                                                                                                                                                                                                                                                                                                                                                |                                                                                                               |
|--------------------------------------------------------------------------------------------------------------------------------------------------|------------------------------------------------------------------------------------------------------------------------------------------------------------------------------------------------------------------------------------------------------------------------------------------------------------------------------------------------------------------------------------------------------------------------------------------------------------------------------------------------------------------------------------------------------------------------------------------------|---------------------------------------------------------------------------------------------------------------|
|                                                                                                                                                  | iDigBio coordinates ADBC digitization efforts. As of 2020, the initiative had digitized 62 million specimens in over 700 collections.                                                                                                                                                                                                                                                                                                                                                                                                                                                          |                                                                                                               |
| International Environmental Specimen Bank Group (IESB)                                                                                           | IESB provides information on member specimen banks around the globe. It also participates in the development of biobanking standards.<br><br>( <a href="https://www.umweltbundesamt.de/en/topics/chemicals/iesb-specimen-banks/esbs">https://www.umweltbundesamt.de/en/topics/chemicals/iesb-specimen-banks/esbs</a> )                                                                                                                                                                                                                                                                         | (Chaplow et al., 2021; Koschorreck, 2015)                                                                     |
| International Nucleotide Sequence Database Collaboration (INSDC)                                                                                 | A consortium consisting of NCBI GenBank, European Nucleotide Archive (ENA), and DNA DataBank of Japan (DDBJ). Hosts a data portal. Participates in the development of metadata standards.                                                                                                                                                                                                                                                                                                                                                                                                      | (Colella et al., 2020; Laird et al., 2018; Lofgren & Stajich, 2021; Robert et al., 2013; Vangay et al., 2021) |
| International Society for Biological and Environmental Repositories (ISBER)                                                                      | Global network of biobanks. ISBER develops and manages cryopreservation protocol and biobank management standards.                                                                                                                                                                                                                                                                                                                                                                                                                                                                             | (Ryan et al., 2021)                                                                                           |
| Irish Cetacean Genetic Tissue Bank (ICGTB)                                                                                                       | ICGTB holds skin samples from deceased stranded whales and dolphins found on the Irish coast.                                                                                                                                                                                                                                                                                                                                                                                                                                                                                                  | (Cetacean Tissue Bank, n.d.)                                                                                  |
| Joint Cetacean Data Programme (JCDP)                                                                                                             | Joint Cetacean Data Programme aggregates and makes available ship-based and aerial observational data.                                                                                                                                                                                                                                                                                                                                                                                                                                                                                         | (Joint Cetacean, n.d.)                                                                                        |
| Leibniz Institute DSMZ - German Collection of Microorganisms and Cell Cultures GmbH<br>( <a href="https://www.dsmz.de">https://www.dsmz.de</a> ) | One of the few collections that accept microbiome and microbial consortia deposits.                                                                                                                                                                                                                                                                                                                                                                                                                                                                                                            | (Debode et al., 2024; DSMZ, 2024)                                                                             |
| Lunar Biorepository                                                                                                                              | Biorepositories are vulnerable to environmental degradation and disasters, political upheavals, institutional and funder changes, owner moves, retirements, and deaths, etc.. Risks can be mitigated by collection backups through specimen sharing and by rescues of orphan collections by absorption into the larger consortia. However, given the importance of Earth's biodiversity heritage, and given the climate and political turmoils that are likely to come this century, a backup off-planet may be in order. Scientists have proposed a backup collection on the dark side of the | (Bakker et al., 2020; Bledsoe et al., 2022; Boundy-Mills et al., 2020; Hagedorn et al., 2024)                 |

|                                                                                                                                                   |                                                                                                                                                                                                                                                                                                                                                                                                                                                                                                                                                                                                                                                                                                                           |                                                                                      |
|---------------------------------------------------------------------------------------------------------------------------------------------------|---------------------------------------------------------------------------------------------------------------------------------------------------------------------------------------------------------------------------------------------------------------------------------------------------------------------------------------------------------------------------------------------------------------------------------------------------------------------------------------------------------------------------------------------------------------------------------------------------------------------------------------------------------------------------------------------------------------------------|--------------------------------------------------------------------------------------|
|                                                                                                                                                   | <p>moon. Such a repository would not need active temperature management and would be sufficiently far away from humanity's follies.</p>                                                                                                                                                                                                                                                                                                                                                                                                                                                                                                                                                                                   |                                                                                      |
| <p>Marbank</p>                                                                                                                                    | <p>Part of the European Blue Biobank network, Marbank is funded by the Norwegian Research Council. Its mission is to facilitate marine academic research and bioprospecting. Marbank coordinates a network of smaller collections in Norway. Marbank collections are a treasure trove of Arctic marine biodiversity. Archived specimens of macrofauna and microbial isolates cover 1,200 species. Most of the specimens were collected in Norwegian waters.</p> <p>Marbank is affiliated with the Marbio bioprospecting platform and the Arctic Biodiscovery Centre. Supported by Marbank collections, Marbio has identified dozens of bioactive compounds and prepared substantial libraries of extracts and assays.</p> | <p>(Rosendal et al., 2016)</p>                                                       |
| <p>Marine Metagenome Metadata Database (MarineMetagenomeDB)<br/>(<a href="https://web.app.ufz.de/marfdb/">https://web.app.ufz.de/marfdb/</a>)</p> | <p>Manually curated, MarineMetagenomeDB contains the metadata of thousands of microbial metagenomes.</p>                                                                                                                                                                                                                                                                                                                                                                                                                                                                                                                                                                                                                  | <p>(Laiolo et al., 2024; Nata'ala et al., 2022)</p>                                  |
| <p>Marine Metagenomics Portal (MMP)<br/>(<a href="https://mmp2.sfb.uit.no/">https://mmp2.sfb.uit.no/</a>)</p>                                     | <p>Maintained by the UiT The Arctic University of Norway, MMP provides access to marine microbial reference genomes (MarRef), incomplete genomes (MarDB), a marine fungi database (MarFun), and a database of salmon-associated prokaryotes (SalDB).</p>                                                                                                                                                                                                                                                                                                                                                                                                                                                                  | <p>(The Arctic University of Norway, n.d.)</p>                                       |
| <p>Microbiome Centers Consortium (MCC)<br/>(<a href="https://microbiomecenters.org/">https://microbiomecenters.org/</a>)</p>                      | <p>MCC's mission is to coordinate microbiome centers across the United States. In essence, it is the head node in a newly formed network. Participating microbiome centers are not biorepositories. Rather, they are academic organizations that educate researchers on microbiome science principles and methods, promote holistic microbiome studies, and facilitate "horizontal" knowledge transfer between medical and environmental microbiome specialists. The MCC is also promoting cross-project standardization and modernization of research funding. However, those efforts are at their early stages.</p>                                                                                                     | <p>(Lobanov et al., 2022; Martiny et al., 2020)</p>                                  |
| <p>MIRRI (Microbial Resource Research Infrastructure)<br/>(<a href="https://www.mirri.org/">https://www.mirri.org/</a>)</p>                       | <p>European network initiative with the goal of integrating pre-existing mBRC networks. MIRRI members span 10 countries. While non-profit, MIRRI provides accessioning and distribution services to both academic and industry clients. MIRRI also provides education and assistance. At this time, MIRRI collections are limited to axenic culturable strains, and focus on bioprospecting-relevant microbes.</p>                                                                                                                                                                                                                                                                                                        | <p>(Becker et al., 2019; Rotter et al., 2021; Schüngel &amp; Stackebrandt, 2015)</p> |
| <p>Movebank<br/>(<a href="https://www.movebank.org/">https://www.movebank.org/</a>)</p>                                                           | <p>Hosts macrofauna tracking data, including seabirds and marine mammals. Contains The Arctic Animal Movement Archive.</p>                                                                                                                                                                                                                                                                                                                                                                                                                                                                                                                                                                                                | <p>(Bernard et al., 2021)</p>                                                        |

|                                                                                                                                                         |                                                                                                                                                                                                                                                                                                                                                                                                                                                                                              |                                                                       |
|---------------------------------------------------------------------------------------------------------------------------------------------------------|----------------------------------------------------------------------------------------------------------------------------------------------------------------------------------------------------------------------------------------------------------------------------------------------------------------------------------------------------------------------------------------------------------------------------------------------------------------------------------------------|-----------------------------------------------------------------------|
| MycoBank<br>( <a href="https://www.mycobank.org/">https://www.mycobank.org/</a> )                                                                       | A digital portal connecting biodiversity databases s.a. GBIF and EMBL and publication databases s.a. PubMed. MycoBank provides identification services, enables users to suggest specimen annotations, and employs professional mycologists as staff curators.                                                                                                                                                                                                                               | (Robert et al., 2013)                                                 |
| Nature's SAFE<br>( <a href="https://www.natures-safe.com/">https://www.natures-safe.com/</a> )                                                          | Nature's SAFE is a UK non-profit biobank, dedicated to cryopreservation of gametes and tissue samples from endangered animals. Nature's SAFE partners with EAZA and a number of zoos and organizations.                                                                                                                                                                                                                                                                                      | (Nature's SAFE, 2020; Pérez-Espona, 2021)                             |
| NCMA (Bigelow National Center for Marine Algae and Microbiota)<br>( <a href="https://ncma.bigelow.org/">https://ncma.bigelow.org/</a> )                 | NCMA holds and distributes strains collected across the globe, supporting research and commercialization of algae.                                                                                                                                                                                                                                                                                                                                                                           | (McCluskey, 2017; NCMA, n.d.)                                         |
| Ocean Biodiversity Information System (OBIS) (Formerly Ocean Biogeographic Information System)<br>( <a href="https://obis.org/">https://obis.org/</a> ) | The global meta-database of marine biodiversity data, containing over 50 million records. The OBIS Network is working to interlink biological and abiotic environmental data repositories, and to develop standards for the inclusion of metadata that describes collecting methods. OBIS uses the Darwin Core metadata standard. OBIS governance and funding are secured through intergovernmental partnerships.                                                                            | (Costello et al., 2013; Klein et al., 2019; Moudrý & Devillers, 2020) |
| Pan-Smithsonian Cryo-Initiative (PSCI)<br>( <a href="https://www.si.edu/psci">https://www.si.edu/psci</a> )                                             | A network of biobanking projects managed by the Smithsonian (US).                                                                                                                                                                                                                                                                                                                                                                                                                            | (Comizzoli, 2017)                                                     |
| PANGAEA                                                                                                                                                 | An Open Access data platform for georeferenced data. Dataset metadata contain links to principal contributors. Datasets may be uploaded before publication and are given DOIs, to be cited in future publications. The uploads are free of fees, and can be secured by temporary moratoria until data of publishing.                                                                                                                                                                         | (Felden et al., 2023)                                                 |
| Pangeo                                                                                                                                                  | Pangeo creates and shares software tools that make it easier for users to prepare and process scientific data. Thus, it can enable and bolster open science, use of consistent standards, and research reproducibility.                                                                                                                                                                                                                                                                      | (Pangeo, n.d.; Verwega et al., 2021)                                  |
| Phaff Yeast Culture Collection                                                                                                                          | Holds over 6,000 strains, and is a globally important resource of yeast strains. A positive demonstration of the need for collection backups. The Phaff collection has at different times been threatened by wildfires and by the loss of the collection founder. However, collection strains are backed up in cryopreserved state in the NLGRP (National Laboratory for Genetic Resource Preservation) biobank. Unfortunately, while the Phaff Collection receives funding from the US NSF, | (Boundy-Mills et al., 2020; McCluskey, 2017)                          |

|                                                                                                                                                                            |                                                                                                                                                                                                                                                                                                                                                                                                                                                                                                                                                                                                                                                                                                                                                                                                                                                                               |                                                             |
|----------------------------------------------------------------------------------------------------------------------------------------------------------------------------|-------------------------------------------------------------------------------------------------------------------------------------------------------------------------------------------------------------------------------------------------------------------------------------------------------------------------------------------------------------------------------------------------------------------------------------------------------------------------------------------------------------------------------------------------------------------------------------------------------------------------------------------------------------------------------------------------------------------------------------------------------------------------------------------------------------------------------------------------------------------------------|-------------------------------------------------------------|
|                                                                                                                                                                            | it does not have a long-term sustainable funding commitment.                                                                                                                                                                                                                                                                                                                                                                                                                                                                                                                                                                                                                                                                                                                                                                                                                  |                                                             |
| Planet Microbe<br>( <a href="https://www.planetmicrobe.org/">https://www.planetmicrobe.org/</a> )                                                                          | A data portal that facilitates metagenomic analyses across multiple marine datasets. The datasets are harmonized through metadata that conforms to OBO ontological semantic standards. Dataset integrations allow for large-scale cross-dataset analyses, bringing exceptional value to users. Planet Microbe does not host data. Rather, it provides data and software tools that help users combine previously incompatible datasets from disparate databases, and export data in a standardized common format. In doing so, platform engineers are developing new metadata standards, designed to handle microbial community sequence data and associated biological and physicochemical (abiotic) ecosystem parameters. The standards are using Frictionless Data Packages that use broad environmental data concepts to produce FAIR and broadly compatible annotations. | (Blumberg et al., 2021; Laiolo et al., 2024)                |
| Polar Data Catalogue<br>( <a href="https://www.polardata.ca/">https://www.polardata.ca/</a> )                                                                              | Run by the Canadian Cryospheric Information Network, the Catalogue is a transdisciplinary repository of Arctic and Antarctic data and metadata. See Bhatia et al. (2021) for an example of such a transdisciplinary dataset.                                                                                                                                                                                                                                                                                                                                                                                                                                                                                                                                                                                                                                                  | (Bhatia et al., 2021)                                       |
| RefSeq (NCBI Reference Sequence Database)                                                                                                                                  | Public database of curated, annotated, and update-able DNA, RNA, and protein sequences. The sequences serve as references for genomic studies.                                                                                                                                                                                                                                                                                                                                                                                                                                                                                                                                                                                                                                                                                                                                | (Breitwieser et al., 2019; NCBI, n.d.; Pruitt et al., 2005) |
| SCAR Antarctic Biodiversity Portal<br>( <a href="https://www.biodiversity.aq/">https://www.biodiversity.aq/</a> )                                                          | Searchable Antarctic biodiversity datasets,                                                                                                                                                                                                                                                                                                                                                                                                                                                                                                                                                                                                                                                                                                                                                                                                                                   | (SCAR Antarctic Biodiversity Portal, n.d.)                  |
| SeaLifeBase<br>( <a href="https://www.sealifebase.se/Home/index.php">https://www.sealifebase.se/Home/index.php</a> )                                                       | Affiliated with FishBase, SeaLifeBase includes non-fish marine fauna. SeaLifeBase contains biological and ecological information on about 240,000 species.                                                                                                                                                                                                                                                                                                                                                                                                                                                                                                                                                                                                                                                                                                                    | (Canonico et al., 2019)                                     |
| Swedish Environmental Specimen Bank / Miljöprovbanken (MPB)<br>( <a href="https://www.nrm.se/samlingar/miljoprovbanken">https://www.nrm.se/samlingar/miljoprovbanken</a> ) | Holds materials from as far back as the 1960ies. Has lending services.                                                                                                                                                                                                                                                                                                                                                                                                                                                                                                                                                                                                                                                                                                                                                                                                        |                                                             |
| Umweltprobenbank / German ESB                                                                                                                                              | Due to its continuous and sustainable public funding, the Umweltprobenbank is considered to be the gold standard. It includes Arctic marine specimens in its collection.                                                                                                                                                                                                                                                                                                                                                                                                                                                                                                                                                                                                                                                                                                      | (Chaplow et al., 2021)                                      |

|                                                                                                                                  |                                                                                                                                                                                                                                                                                                                                                                                                     |                                                                    |
|----------------------------------------------------------------------------------------------------------------------------------|-----------------------------------------------------------------------------------------------------------------------------------------------------------------------------------------------------------------------------------------------------------------------------------------------------------------------------------------------------------------------------------------------------|--------------------------------------------------------------------|
| <a href="https://www.umweltprobenbank.de">https://www.umweltprobenbank.de</a>                                                    |                                                                                                                                                                                                                                                                                                                                                                                                     |                                                                    |
| <p>WikiProfessional Life Sciences<br/> <a href="https://www.wikiprofessional.org/">https://www.wikiprofessional.org/</a></p>     | <p>A citizen science effort to create a searchable index of authors of scientific publications in the PubMed database, and to cross-link author's records with the records of their contributions. The purpose of the project is to improve access to related clusters of biological information and to incentivize open science and comprehensive annotations by assigning reputation credits.</p> | <p>(Howe et al., 2008)</p>                                         |
| <p>World Data Centre for Microorganisms (WDCM)<br/> <a href="https://www.wdcm.org/">https://www.wdcm.org/</a></p>                | <p>WDCM is the portal for WFCC-MIRCEN, World Data System (WDS), The Asian Consortium for the Conservation and Sustainable Use of Microbial Resources (ACM), Asian Network of Research Resource Centers (ANRRC), and other culture collections. WDCM provides access to microbial strain databases and management and analysis software.</p>                                                         | <p>(WDCM, n.d.; Wu et al., 2017)</p>                               |
| <p>World Federation for Culture Collections (WFCC)<br/> <a href="http://www.wfcc.info">www.wfcc.info</a></p>                     | <p>Provides the WFCC World Data Centre for Microorganisms (WDCM) searchable database of known mBRCs.</p>                                                                                                                                                                                                                                                                                            | <p>(McCluskey, 2017)</p>                                           |
| <p>World Register of Deep-Sea Species (WoRDSS)</p>                                                                               | <p>A taxonomic database of deep-sea species.</p>                                                                                                                                                                                                                                                                                                                                                    | <p>(Stefanni et al., 2022)</p>                                     |
| <p>World Register of Marine Species (WoRMS)<br/> <a href="https://www.marinespecies.org/">https://www.marinespecies.org/</a></p> | <p>A comprehensive taxonomic database of marine species. Annotations are curated by volunteer outside experts, under the oversight of WoRMS editors. WoRMS contributes its data to GBIF and other databases.</p>                                                                                                                                                                                    | <p>(Costello et al., 2018; Stefanni et al., 2022; WoRMS, n.d.)</p> |



## Standards: Fieldwork and Laboratory Protocols and Tools

[Back To Table Of Contents](#)

| Name                                                                                                                                                                                                                                                                     | Description                                                                                                                                                                                                                                                                                                                                                                                                                                                                                                                                                                                                                                                                                                                                                                                                                                                                                                                                                                           | Citations                                                                                                                                                                                                                                                                                                    |
|--------------------------------------------------------------------------------------------------------------------------------------------------------------------------------------------------------------------------------------------------------------------------|---------------------------------------------------------------------------------------------------------------------------------------------------------------------------------------------------------------------------------------------------------------------------------------------------------------------------------------------------------------------------------------------------------------------------------------------------------------------------------------------------------------------------------------------------------------------------------------------------------------------------------------------------------------------------------------------------------------------------------------------------------------------------------------------------------------------------------------------------------------------------------------------------------------------------------------------------------------------------------------|--------------------------------------------------------------------------------------------------------------------------------------------------------------------------------------------------------------------------------------------------------------------------------------------------------------|
| Association for Advancing and Participatory Sciences (AAPS) (formerly the Citizen Science Association (CSA))<br><a href="https://participatorysciences.org/">(https://participatorysciences.org/)</a>                                                                    | AAPS provides a wealth of resources to help researchers conduct and communicate ethical and robust research. The resource library is focused on, but is by no means limited to citizen science. Resources include: information on data and collaboration ethics, technical tips, examples of consent and other collaboration-relevant forms, legal and policy resources, research quality measurement tools, educational materials and webinars, and more.                                                                                                                                                                                                                                                                                                                                                                                                                                                                                                                            | (Association for Advancing and Participatory Sciences, n.d.)                                                                                                                                                                                                                                                 |
| Citizen/Community/Participatory Science platforms<br><a href="https://participatorysciences.org/resources/platforms-for-hosting-participatory-science-projects/">(https://participatorysciences.org/resources/platforms-for-hosting-participatory-science-projects/)</a> | The Association for Advancing Participatory Sciences (AAPS) has a list of tech platforms that host / provide functionalities for citizen science projects.                                                                                                                                                                                                                                                                                                                                                                                                                                                                                                                                                                                                                                                                                                                                                                                                                            | (Platforms for hosting participatory science projects, n.d.)                                                                                                                                                                                                                                                 |
| Cryopreservation: cryoprotection                                                                                                                                                                                                                                         | <p>At temperatures below freezing, formation of ice crystals is a threat to viability, through physical cellular injury or osmotic and other forms of stress. Preventive methodologies most commonly employ cryoprotective agents (CPAs) – additives that affect the structure of aqueous environments. Other cryoprotection methods include manipulation of the physical properties of the sample. For example, keeping constant the sample volume (isochoric vitrification), or employing electromagnetic or ultrasound waves to agitate the aqueous environment.</p> <p>CPAs are often toxic, and different microbial families may have different reactions to a CPA. In general, any given cryoprotectant or cryoprotection mechanism will affect different organisms and/or tissues differently, and there is no "one size fits all" method.</p> <p>Thus, even in samples cryopreserved at -196°C, measurements of post-thaw community structure and function may be biased.</p> | (Best, 2015; Biclôt et al., 2022; Carroll et al., 2012; Chang and Zhao, 2021; Corrales & Astrin, 2023; Corthals & Desalle, 2005; Gao & Critser, 2000; Heylen et al., 2012; Junge et al., 2006; Müller et al., 2007; Nakanishi et al., 2012; Prakash et al., 2013; Rain-Franco et al., 2021; Yu et al., 2015) |
| Cryopreservation: temperature                                                                                                                                                                                                                                            | Common cryopreservation options are electrical freezer storage at -80°C and storage in liquid nitrogen (LN) at -196°C (or in some implementations, its gas phase, at -139°C and below). Electric freezer storage is relatively cost-effective and accessible – many research institutions have -80°C freezers, the freezers don't require special expertise to handle, and only need electricity to run.                                                                                                                                                                                                                                                                                                                                                                                                                                                                                                                                                                              | (Carroll et al., 2012; Corrales & Astrin, 2023; Corthals & Desalle, 2005; Heylen                                                                                                                                                                                                                             |

|                                                                                          |                                                                                                                                                                                                                                                                                                                                                                                                                                                                                                                                                                                                                                                                                                                                                                                                                                                                                                                                                                                                                                                                                                                                                                                                                                                                                                                                                                                                                                                                |                                                                                                                                       |
|------------------------------------------------------------------------------------------|----------------------------------------------------------------------------------------------------------------------------------------------------------------------------------------------------------------------------------------------------------------------------------------------------------------------------------------------------------------------------------------------------------------------------------------------------------------------------------------------------------------------------------------------------------------------------------------------------------------------------------------------------------------------------------------------------------------------------------------------------------------------------------------------------------------------------------------------------------------------------------------------------------------------------------------------------------------------------------------------------------------------------------------------------------------------------------------------------------------------------------------------------------------------------------------------------------------------------------------------------------------------------------------------------------------------------------------------------------------------------------------------------------------------------------------------------------------|---------------------------------------------------------------------------------------------------------------------------------------|
|                                                                                          | <p>However, at temperatures between 0°C and -135°C, samples can still contain liquid water, and over time, ice - water fluctuations can damage cells and less stable molecules such as RNA. This is a particular issue for storage of psychrophilic extremophiles, such as bacteria that live in Arctic sea ice. Sea ice-resident microbes are ecosystem engineers – they raise the temperature around themselves, creating channels in the ice. Thus, they may retain some activity at temperatures lower than expected.</p> <p>At temperatures below -135°C, water enters a glass-like state (vitrification), and cannot form ice. Therefore, storage in liquid nitrogen is considered to "freeze" the specimen in time, with a full stop to all metabolism and degradation activities (see Junge et al. (2006) for caveat). Some institutions, such as the AMCC choose to use the gas phase LN to reduce the risk of contamination. While LN storage is more expensive and requires special training and maintenance, specimens preserved in LN can be maintained indefinitely and remain viable on restoration.</p>                                                                                                                                                                                                                                                                                                                                        | <p>et al., 2012; Junge et al., 2006; Müller et al., 2007; Nakanishi et al., 2012; Prakash et al., 2013; Rain-Franco et al., 2021)</p> |
| <p>Cryopreservation: field cryopreservation and transport under cryogenic conditions</p> | <p>Please see Corrales and Astrin (2023), Harvard Campus Services Environmental Health &amp; Safety (2023), Rüdél et al. (2015), Rüdél and Weingärtner (2008) and Snapes et al. (2023).</p>                                                                                                                                                                                                                                                                                                                                                                                                                                                                                                                                                                                                                                                                                                                                                                                                                                                                                                                                                                                                                                                                                                                                                                                                                                                                    |                                                                                                                                       |
| <p>Cryopreservation: preparation for analyses</p>                                        | <p>Since cryoinjured samples may still be sequenced for metagenomic identification, cryopreservation in addition to in the field sequencing immediately after collection offers the widest range of options for follow-up studies.</p> <p>As with in-the-field sequencing, post-cryopreservation sequencing results may be biased by the presence of relic DNA (extracellular DNA from dead cells and living cell excretions). Additionally, the stresses of cryopreservation have variable effects on different taxa, and can exert selective pressures and bias estimations of abundance. To account for possible bias, it can be helpful to exclude nucleic acids from the environment and from dead cells, and to compare sequencing results to those obtained from the same sample prior to storage. One technique that is appropriate for mixed microbial communities and does not require advanced laboratory equipment is live/dead staining with propidium monoazide (PMA). PMA is an intercalating dye that binds permanently to DNA and RNA when activated by UV light. It does not cross cell membranes, and is used to exclude extracellular nucleic acids from amplification. There are other dye-based live/dead assays s.a. techniques based on the SYTOX™ Green nucleic acid stain for fluorescence assays of chlorophyll-bearing organisms, and the LIVE/DEAD™ Fixable Aqua amine-reactive dye for investigations of metabolic activity.</p> | <p>(Best, 2015; Emerson et al., 2017; Müller et al., 2007; Ryan et al., 2021)</p>                                                     |

|                                                                                                                          |                                                                                                                                                                                                                                                                                                                                                                                                                                                                              |                                                                |
|--------------------------------------------------------------------------------------------------------------------------|------------------------------------------------------------------------------------------------------------------------------------------------------------------------------------------------------------------------------------------------------------------------------------------------------------------------------------------------------------------------------------------------------------------------------------------------------------------------------|----------------------------------------------------------------|
|                                                                                                                          | Some studies have found evidence of cryopreservation being associated with increased rate of mutations. Proposed mechanisms include cryoprotectant toxicity and temperature variation damage to proteins affecting the ability of enzymes to repair DNA.                                                                                                                                                                                                                     |                                                                |
| CyberTracker<br>( <a href="https://cybertracker.org/">https://cybertracker.org/</a> )                                    | Mobile software for biodiversity, farming, forestry, community science and education, and survey data capture, designed with graphical icon-based interfaces for non-literate citizen scientist users.                                                                                                                                                                                                                                                                       | (CyberTracker, n.d.; Liebenberg et al., 2017)                  |
| Earth HoloGenome Initiative (EHI)<br>( <a href="https://www.earthhologenome.org/">https://www.earthhologenome.org/</a> ) | EHI works to facilitate microbiome research and promote standardization of practices and metadata. Specimen biobanking is one of the EHI core goals – the initiative aims to develop and implement biobanking strategies that would enable field sample reuse by future researchers.                                                                                                                                                                                         | (Corrales & Astrin, 2023; Earth HoloGenome Initiative, 2024)   |
| Earth Microbiome Project (EMP)                                                                                           | Due to the distributed collection strategy, standardization of collection and handling protocols and of metadata expectations was a need. The EMP committee had designed project standards for their contributors to use in common. For metadata, the EMP framework was a set of data expectations to be recorded in a MIxS- and ENVO-compatible format. The EMP coordinated protocol and metadata standards were a major contribution to the evolution of global standards. | (Gilbert et al., 2014; Thompson et al., 2017)                  |
| Field Collecting: marine microbiomes                                                                                     | Patin and Goodwin (2023) is a literature review with best practices recommendations contributing to discussions of collection methods standardization.                                                                                                                                                                                                                                                                                                                       | (Patin and Goodwin, 2023)                                      |
| Global Open Oceans and Deep Seabed (GOODS)                                                                               | GOODS is a classification system for species biogeography in the deep ocean. A globally understood classification system is needed for scientists to be able to mesh observations from disparate monitoring platforms and projects.                                                                                                                                                                                                                                          | (Canonico et al., 2019)                                        |
| International Environmental Specimen Bank Group (IESB)                                                                   | IESB coordinates collaborations between specimen biobanks and promotes international development of standards for environmental specimen banking.                                                                                                                                                                                                                                                                                                                            | (Chaplow et al., 2021; Koschorreck, 2015)                      |
| International Society for Biological and Environmental Repositories (ISBER)                                              | ISBER publishes the "ISBER Best Practices" comprehensive handbook that contains cryopreservation methods for a wide array of organisms, materials, and situations, including marine life. It also develops and publishes standards and tools for biorepositories.                                                                                                                                                                                                            | (Chaplow et al., 2021; Snapes et al., 2023)                    |
| medical biobanks                                                                                                         | Most cryobanking research is done in the context of human medicine. Medical applications are widespread and are better funded than conservation cryobanking. This is especially true for novel applications, such as cryobanking of mixed microbial communities, where medical stool banks have early expertise. Medical biobanking communities are developing protocols and technologies, and can be sources of interdisciplinary collaborations and knowledge transfer.    | (Carroll et al., 2012; Snapes et al., 2023; West et al., 2019) |

|                                                                                       |                                                                                                                                                                                                                                                                                                                                                                                                                                                                                                                                                                                                                                                                                                                                                                                                                                     |                                                                     |
|---------------------------------------------------------------------------------------|-------------------------------------------------------------------------------------------------------------------------------------------------------------------------------------------------------------------------------------------------------------------------------------------------------------------------------------------------------------------------------------------------------------------------------------------------------------------------------------------------------------------------------------------------------------------------------------------------------------------------------------------------------------------------------------------------------------------------------------------------------------------------------------------------------------------------------------|---------------------------------------------------------------------|
| MICROBE EU                                                                            | The new MICROBE EU initiative is an early effort to advance techniques, data standards, and infrastructure plans for preservation of naturally occurring non-human microbiomes. The goals include development of preservation techniques for multi-domain mixed microbial communities, development of standardized collection and preparation methods, and development of plans for future biobanking infrastructures.                                                                                                                                                                                                                                                                                                                                                                                                              | (MICROBE, 2023)                                                     |
| Microbiota Vault                                                                      | The Microbiota Vault is a proposal for a centralized biobank of global human microbiome diversity.                                                                                                                                                                                                                                                                                                                                                                                                                                                                                                                                                                                                                                                                                                                                  | (Corrales & Astrin, 2023; Ryan et al., 2021; Steiger & Heuss, 2020) |
| Ocean Best Practices (OBP) / Ocean Best Practices System (OBPS)                       | <p>OBP hosts a document repository for observation protocols, data management methods, community engagement, and other practices in marine research. OBP is a UN Ocean Decade programme, and part of the Ocean Practices Network, which coordinates working groups and communities and hosts user discussion forums, among other activities. OBP employs experts to vet methodologies that are disseminated as Endorsed Practices. It also solicits write-ups on working solutions from the global research and management communities, and facilitates exchange of community knowledge.</p> <p>The OBPS document repository is a treasure trove of information on conducting marine research in the Arctic, working with citizen scientists, integrating with existing monitoring projects in diverse disciplines, etc..</p>       | (Collins J.E. et al., 2021; IOC/IODE, 2024)                         |
| propidium monoazide (PMA)                                                             | PMA is a permanent DNA-intercalating dye that does not cross cell membranes. Thus, PMA excludes extracellular DNA from lysed cells, relic DNA, etc. from downstream amplification. Treatment with PMA is used for Live/Dead testing. Cross-referencing PMA-treated and untreated samples may add insight into the microbial community state at the time of collection, and into the dynamic short-term community fluctuations. It can also be used to ascertain any damage that cells incurred during the cryopreservation and rewarming processes. The technique may be of particular interest in Arctic marine microbiology, where low biomass samples and similarity of Arctic microbes to common PCR contaminants is a problem. Both cryopreservation and PMA treatment can be performed in the field, with portable equipment. | (Edwards et al., 2020; Emerson et al., 2017)                        |
| protocols.io<br>( <a href="https://www.protocols.io/">https://www.protocols.io/</a> ) | protocols.io supports Open Science by providing a platform for sharing of laboratory, fieldwork, etc. protocols. Authors are encouraged to upload their methods when publishing a paper, to share experience, and to collaborate.                                                                                                                                                                                                                                                                                                                                                                                                                                                                                                                                                                                                   | (Springer Nature, 2024)                                             |

## Standards: Access and Benefit Sharing and Legal and Policy Requirements and Initiatives

[Back To Table Of Contents](#)

The authors call on funders, publishers, academic institutions, and professional societies to write and uphold codes of conduct and to provide education, assistance, and resources for equitable collaborations with local communities. Inclusive collaboration, comprehensive documentation and transparency, vouchering, and reporting of results back to local stakeholders take time, effort, and money. In the current academic environments, researchers feel pressured to produce and may not have the funds or time resources to expand non-required JEDI (Justice, Equity, Diversity, and Inclusion) practices. Therefore, in addition to expanding and affirming codes of conduct, institutions must provide researchers with the means and supportive encouragement to implement best practices (Mallory et al., 2018). ABS must also be a central consideration for biorepositories and networks, and additional codification of expectations and supportive infrastructures is called for.

Below are examples of some of the legal and project design expectations that may be relevant to Arctic marine studies. We also include select references on the financial stakes in marine exploration in the Arctic – the potential of bioprospecting (looking at nature for biotechnological, pharmaceutical, and nutraceutical innovation).

| Regulation and Ethical Requirements    | Background and Recommendations                                                                                                                                                                                                                                                                                                                                                                                                                                                                                                                                                                                                                                                                                                                                                                                  | Citations                                                                                                                                                                                                                    |
|----------------------------------------|-----------------------------------------------------------------------------------------------------------------------------------------------------------------------------------------------------------------------------------------------------------------------------------------------------------------------------------------------------------------------------------------------------------------------------------------------------------------------------------------------------------------------------------------------------------------------------------------------------------------------------------------------------------------------------------------------------------------------------------------------------------------------------------------------------------------|------------------------------------------------------------------------------------------------------------------------------------------------------------------------------------------------------------------------------|
| ABS: Distribution Options              | <p>Access and Benefit Sharing includes the sharing of monetary profits derived from exploitation of marine resources, knowledge transfer, and capacity building. We suggest allocations of dedicated funds towards distributing collections between high- and low-income countries, international sharing of biobanking services and expertise, and building up of biobanking capacities in countries with low concentrations of biodiversity biobanks. Additionally, local stakeholders must be included in determinations of research priorities, and governance of environmental impacts. ABS may also be seen through the lens of cost sharing, as well as benefit sharing, as ways to understand global, national, and institutional infrastructure investments and responsibilities.</p>                  | (Collins J.E. et al., 2021; Haklay et al., 2020; Laird et al., 2018; Rosendal et al., 2016)                                                                                                                                  |
| Compliance: International and National | <p>These are some of the legal frameworks that are relevant to biobanking-supported research. In some cases the practical definitions and enforcement of international laws, such as the Nagoya Protocol, are left to the individual countries. Due to the complexity of the landscape, researchers need institutional support with compliance paperwork.</p> <ul style="list-style-type: none"> <li>- Aarhus Convention</li> <li>- Agreement on Enhancing International Arctic Scientific Cooperation</li> <li>- <a href="#">Bonn</a> Guidelines</li> <li>- <a href="#">Budapest</a> Treaty on the deposition of patentable microorganisms</li> <li>- CARE Principles for Indigenous Data Governance</li> <li>- Cartagena Protocol On Biosafety</li> <li>- Convention on Biological Diversity (CBD)</li> </ul> | (Bentley et al., 2024; Carcia-Soto & van der Meeren, 2017; Desai and Sidhu, 2020; Fritze, 2009; Goodwin et al., 2017; Haklay et al., 2020; Kraabel, 2020; Laird et al., 2018; Ma et al., 2016; McCluskey, 2017; Moss et al., |

|                                                                                                                                       |                                                                                                                                                                                                                                                                                                                                                                                                                                                                                                                                                                                                                                                                                                                                                                                                                                                                                                                                                                                                                        |                                                                                                                                                                                                                      |
|---------------------------------------------------------------------------------------------------------------------------------------|------------------------------------------------------------------------------------------------------------------------------------------------------------------------------------------------------------------------------------------------------------------------------------------------------------------------------------------------------------------------------------------------------------------------------------------------------------------------------------------------------------------------------------------------------------------------------------------------------------------------------------------------------------------------------------------------------------------------------------------------------------------------------------------------------------------------------------------------------------------------------------------------------------------------------------------------------------------------------------------------------------------------|----------------------------------------------------------------------------------------------------------------------------------------------------------------------------------------------------------------------|
|                                                                                                                                       | <ul style="list-style-type: none"> <li>- Convention on International Trade of Endangered Species (CITES)</li> <li>- International Court of Justice (ICJ)</li> <li>- International Tribunal for the Law of the Sea (ITLOS)</li> <li>- Kunming–Montreal Biodiversity Package</li> <li>- MOSAICC (Micro-organism Sustainable Use and Access Regulation International Code of Conduct)</li> <li>- Marine Biodiversity of <a href="#">Areas Beyond National Jurisdiction</a></li> <li>- <a href="#">Nagoya Protocol</a> on Access and Benefit Sharing</li> <li>- Convention for the Protection of the Marine Environment of the North-East Atlantic (OSPAR)</li> <li>- Rio Declaration on Environment and Development</li> <li>- TRACES</li> <li>- UNCLOS (United Nations Convention on the Law of the Sea)</li> <li>- Canada: Oceans Act, Oceans Strategy</li> <li>- European Union: Marine Strategy Framework Directive (MSFD)</li> <li>- United States: Oceans Act, National Ocean Policy Implementation Plan</li> </ul> | 2023; Prakash et al., 2013)                                                                                                                                                                                          |
| Compliance: Corporate and Institutional                                                                                               | <p>These are examples of the types of agreements that are made between individual entities (a research team and a biobank, a corporation and a university, etc.). Researchers need assistance with the legal landscape.</p> <ul style="list-style-type: none"> <li>- Material Transfer Agreements</li> <li>- Intellectual property (IP) paperwork (subject to local regulations)</li> <li>- Product agreements</li> <li>- Agreements between institutions, funders, research teams, and local contributors such as traditional knowledge holders, local communities, citizen science communities, town councils, tribal leaders, etc.</li> </ul>                                                                                                                                                                                                                                                                                                                                                                       | (Association for Advancing and Participatory Sciences, n.d.; Carcia-Soto & van der Meeren, 2017; Dedeurwaerdere, 2010; Fritze, 2009; Haklay et al., 2020; Laird et al., 2018; McCluskey, 2017; Prakash et al., 2013) |
| <p>JEDI (Justice, Equity, Diversity, and Inclusion):</p> <p>Local and Indigenous Arctic Communities and Participating Researchers</p> | <p>Local contributors include: external researchers from local academic institutions, local communities, local leaders and councils, Indigenous, traditional, and historical knowledge owners, and more. Local contributors are often inadequately documented in research metadata, and are rarely acknowledged in scientific publications. Documenting local contributions is necessary to acknowledge and reward contributions, inclusion in Access and Benefit Sharing, participation in decision making, and other activities that may be governed by either current or future laws.</p> <p>Indigenous Arctic communities are the traditional ecosystem owners and key stakeholders of local research. In this context, "local" includes coastal and near-shore marine research and research in the adjoining ABNJ and BBNJ areas. While some of the relevant legal and regulatory agreements</p>                                                                                                                  | (APECS, 2024; Arctic Council, 2019; Association for Advancing and Participatory Sciences, n.d.; Boundy-Mills et al., 2020; Buckner et al., 2021; Buschman, 2022; Carlo, 2020; Collins et al., 2019;                  |

|                            |                                                                                                                                                                                                                                                                                                                                                                                                                                                                                                                                                                                                                                                                                                                                                                                                                                                                                                                                                                                                                                                                                                                                                                                                                                                                                                                                                                                                                                                                                                                                                                                                                                                                                                                                                                                                                                                                                                                                                                                                                                          |                                                                                                                                                                                                                    |
|----------------------------|------------------------------------------------------------------------------------------------------------------------------------------------------------------------------------------------------------------------------------------------------------------------------------------------------------------------------------------------------------------------------------------------------------------------------------------------------------------------------------------------------------------------------------------------------------------------------------------------------------------------------------------------------------------------------------------------------------------------------------------------------------------------------------------------------------------------------------------------------------------------------------------------------------------------------------------------------------------------------------------------------------------------------------------------------------------------------------------------------------------------------------------------------------------------------------------------------------------------------------------------------------------------------------------------------------------------------------------------------------------------------------------------------------------------------------------------------------------------------------------------------------------------------------------------------------------------------------------------------------------------------------------------------------------------------------------------------------------------------------------------------------------------------------------------------------------------------------------------------------------------------------------------------------------------------------------------------------------------------------------------------------------------------------------|--------------------------------------------------------------------------------------------------------------------------------------------------------------------------------------------------------------------|
|                            | <p>have not been reached, practitioners should strive to pre-emptively collect and record full provenance and contributor metadata (while following data ethics standards). Such comprehensive metadata, will help ensure near-future usability and help decolonize marine research.</p> <p>Future metadata standards and operating codes of conduct must provide for documentation of:</p> <ul style="list-style-type: none"> <li>- specimen, sample, and observations provenance</li> <li>- individual and institutional contributions</li> <li>- tracking of secondary use and sharing of research benefits, s.a. marine genetic resource (MGR) sequence data</li> <li>- tracking ABS distributions</li> <li>- associations with available raw sequences (primary data), and analysis products (secondary data), detailed collection protocols and analysis code, vouchered data and specimens, and known associations with outside datasets (s.a. other studies done within the microecosystem) and databases (s.a. associations with databases with physicochemical remote sensing data).</li> </ul> <p>The authors call on funders, academic and research institutions, and professional societies to create harmonized codes of conduct and to provide the organizational resources that scientists need for thoughtful and ethical collaborations with local contributors and Indigenous communities.</p> <p>The authors recommend that practitioners follow available standards and maintain awareness of the evolving legal landscapes. Examples of concrete suggestions are provided by Marden et al. (2021) and Laird et al. (2018).</p> <p>Practitioners should also let themselves be guided by the principles outlined by the communities. The Association for Participatory Sciences hosts a library of toolkits, information, and guidance for researchers and practitioners. The Association of Polar Early Career Scientists (APECS) has also created a collection of helpful educational material and resources.</p> | <p>Collins J.E. et al., 2021; Haklay et al., 2020; Greenfield 2022; Johnson et al., 2016; Kraabel 2020; Laird et al., 2018; Marden et al., 2021; Pedersen et al., 2020; Robert et al., 2013; Stephenson, 2021)</p> |
| <p>Resources: INTERACT</p> | <p>INTERACT (International Network for Terrestrial Research and Monitoring in the Arctic) is a web platform that aggregates information on permits, regulations, and paperwork relevant to research in Arctic Council member states.</p>                                                                                                                                                                                                                                                                                                                                                                                                                                                                                                                                                                                                                                                                                                                                                                                                                                                                                                                                                                                                                                                                                                                                                                                                                                                                                                                                                                                                                                                                                                                                                                                                                                                                                                                                                                                                 | <p>(Interact International Network, n.d.)</p>                                                                                                                                                                      |
| <p><b>The Stakes</b></p>   | <p>Marine life has inspired scientific discoveries and is exploited in a wide range of industries. Microbial and other marine biotechnologies contribute to an array of health- environment- and sustainable growth-related UN SDGs.</p>                                                                                                                                                                                                                                                                                                                                                                                                                                                                                                                                                                                                                                                                                                                                                                                                                                                                                                                                                                                                                                                                                                                                                                                                                                                                                                                                                                                                                                                                                                                                                                                                                                                                                                                                                                                                 | <p>(Arora et al., 2021; Blockley et al., 2017; Boundy-Mills et al., 2020; Bruno et al.,</p>                                                                                                                        |

Marine microbes are rich sources of Marine Natural Products (MNPs) – compounds with potential uses in medicine and biotechnologies. Over 20,000 MNPs have been discovered between the 1950ies and 2017, with the majority of those compounds produced by microbes. Of particular interest are mixed microbial communities, such as the microbiomes associated with vertebrate and invertebrate hosts. The complexities of interactions within such communities produce functional adaptations that are often unique. Other areas of bioprospecting focus are extreme microecosystems – areas that may have unusually high or low salinity, temperature, pH, nutrient levels, high concentrations of metals or pollutants, high radiation, or areas at high pressure. Arctic marine environments are rich in extreme microecosystems, such as areas of high temperatures near hydrothermal vents, low temperatures in sea ice, lowered salinities near marine-terminating glaciers, high concentrations of metals and organic pollutants near wastewater treatment plants or glacier meltwater outflows, and oligotrophic environments. Enzymes isolated from extremophiles (microbes adapted to extreme conditions) may be used in biosynthesis reactors, such as for production that saves energy by working at low temperatures. They may also perform in high-temperature conditions where other proteins may denature (such as in PCR reactions). Computational investigations of protein structure changes associated with cold-adapted functions help develop novel enzymes that may act on non-natural industrial substrates.

ABS is a dynamic field. In addition to the conversations on equity and distribution options, the very concepts of marine resources are shifting. Bioprospecting can be performed on omic sequences in databases as well as physical samples. Omic sequences may be processed, related and shared. Additionally, strain and epigenetic microdiversity can obfuscate ownership. Thus, ABS depends on multiple parallel conversations on policies, definitions and data ontologies.

#### Benefits: Pharmaceuticals and Medical Research

- Novel molecules with medical applications as: antibiotics, antifungals, antivirals, antiplasmodials, analgesics, cancer chemotherapies, antiinflammatories, and antioxidants, as well as compounds with antiosteoporotic, antidiabetic, hypocholesterolemic, and neuroprotective actions. Target diseases include: heart disease, cancer, Alzheimer's, and arthritis. Cryoprotectants for organ cryopreservation research.

#### Benefits: Agriculture and Aquaculture

- Thermophilic marine archaea-produced chitinase may be developed to hydrolyze chitin, making it available as feedstock.
- Marine-derived food preservatives, stabilizers, and cryoprotectants (allowing food to be frozen or preserved with less spoilage waste and allowing for slower, more sustainable shipping).

2019; Cockell & Jones, 2009; Collins F.W.J. et al., 2021; Collins & Margesin, 2019; Delgado, 2021; Fritze, 2009; Gauthier et al., 2021; Hoag, 2009; Lo Giudice & Rizzo, 2018; Rölfer et al., 2021; Rotter et al., 2021; Segal-Kischinevzky et al., 2022; Timmis et al., 2017)



Benefits: Biotechnologies

- Less toxic antifouling paints for ships' hulls.
- Algae-based biofuels, which may be coupled with wastewater valorization.

Benefits: Bioremediation

- Biorefineries may someday process lignocellulosic waste into biofuels.
- Marine microbes from around natural oil seeps may help clean oil spills.

Additional background information may be found in Stephenson (2021). Grenié et al. (2023) provide examples of taxonomy R packages. Damerow et al. (2021) explore and identify gaps in persistent identifier standards and capabilities.

| Name                                                                                                                              | Description                                                                                                                                                                                                                                                                                                                                                                                                                                                                                                                                                                                                                                                                                                                                                                                                                                                                                                                                                                                                                                                                                                                                                                                                                                                                                                                                                                                                                                                                                                                                                                                                                                                                                                                                                                                                                                                                                                                                                                                                                                                                                                                                                                                                                       | Citations                                 |
|-----------------------------------------------------------------------------------------------------------------------------------|-----------------------------------------------------------------------------------------------------------------------------------------------------------------------------------------------------------------------------------------------------------------------------------------------------------------------------------------------------------------------------------------------------------------------------------------------------------------------------------------------------------------------------------------------------------------------------------------------------------------------------------------------------------------------------------------------------------------------------------------------------------------------------------------------------------------------------------------------------------------------------------------------------------------------------------------------------------------------------------------------------------------------------------------------------------------------------------------------------------------------------------------------------------------------------------------------------------------------------------------------------------------------------------------------------------------------------------------------------------------------------------------------------------------------------------------------------------------------------------------------------------------------------------------------------------------------------------------------------------------------------------------------------------------------------------------------------------------------------------------------------------------------------------------------------------------------------------------------------------------------------------------------------------------------------------------------------------------------------------------------------------------------------------------------------------------------------------------------------------------------------------------------------------------------------------------------------------------------------------|-------------------------------------------|
| <b>General Notes</b>                                                                                                              | <p>One of the uses that currently accepted standards do not fully provide for is Access and Benefit Sharing (ABS) compliance. While some of the requisite schema properties are included, they are not nearly enough. In part, this is because there aren't yet global agreements on how to best do ABS. We know we need to record provenance (collection location, jurisdiction, the collecting team, etc.). We also need to track all legal agreements that were in force when the sample was collected, plus all follow-up agreements that may be reached over the course of the use of the sample. The legal landscape is evolving, for example, the BBNJ agreement was only signed last year. We also need to keep track of how the sample is used by the collecting team, and then how it's used in subsequent research. For example, biotechnology and pharmaceutical projects can be spun off by academic institutions into for-profit startups (what we term "porous academia-industry barriers"). A research team may informally share its cultures with a team across the hall. Or a researcher may download a product of the research that the original sample was a part of. Etc., etc.. At this time, there is no global consensus on how research benefits are to be determined and shared, and no comprehensive implementations. Databases, portals, metadata standards, all will need to be overhauled as the topic develops.</p> <p>Marine researchers may sometimes feel that ABS responsibilities stop at following existing laws and regulations. We feel that bare minimum compliance is shortsighted. We believe that best practice is to make metadata as comprehensive as feasible, in the expectation that laws and standards will be extended and clarified in the future.</p> <p>Some early initiatives include:</p> <ul style="list-style-type: none"> <li>- European Culture Collections Organisation's: core-MTA standard</li> <li>- Microorganisms Sustainable use and Access regulation International Code of Conduct (MOSAICC) and TRansparent User-friendly System of Transfer (TRUST): standards for legal paperwork relating to microorganisms and the CBD and Nagoya legislation</li> </ul> | (Becker et al., 2019; Laird et al., 2018) |
| Biospecimen Reporting for Improved Study Quality (BRISQ)<br>( <a href="https://biobanking.org/we">https://biobanking.org/we</a> ) | Designed for biomedical research, this standard describes individual specimen properties, but is not designed to answer biodiversity biobanking needs.                                                                                                                                                                                                                                                                                                                                                                                                                                                                                                                                                                                                                                                                                                                                                                                                                                                                                                                                                                                                                                                                                                                                                                                                                                                                                                                                                                                                                                                                                                                                                                                                                                                                                                                                                                                                                                                                                                                                                                                                                                                                            | (LaBaer et al., 2018)                     |

|                                                                                  |                                                                                                                                                                                                                                                                                                                                                                                                                                                                                                                                                                                            |                                                                     |
|----------------------------------------------------------------------------------|--------------------------------------------------------------------------------------------------------------------------------------------------------------------------------------------------------------------------------------------------------------------------------------------------------------------------------------------------------------------------------------------------------------------------------------------------------------------------------------------------------------------------------------------------------------------------------------------|---------------------------------------------------------------------|
| <a href="#">bs/brisq</a> )                                                       |                                                                                                                                                                                                                                                                                                                                                                                                                                                                                                                                                                                            |                                                                     |
| Common Biorepository Model Project ( <a href="#">CBM</a> )                       | A metadata model for sharing key specimen information to facilitate inter-repository searches. Does not provide for full data exchange.                                                                                                                                                                                                                                                                                                                                                                                                                                                    | (NCIP/common-biorepository-model, 2023)                             |
| DwC                                                                              | Darwin Core Standard, developed by the Biodiversity Information Standards (TDWG) organization. DwC has gained popularity and acceptance in a number of scientific fields, and is used by GBIF. The core DwC specification is designed to accept extensions – specialized DwC standards developed for specialty datasets. Extensions development is in its early stages. For example bioacoustic metadata standards are in discussion.                                                                                                                                                      | (Darwin Core Archives – How-to Guide :: GBIF IPT User Manual, n.d.) |
| Findable, Accessible, Interoperable and Reusable ( <a href="#">FAIR</a> )        | Findable: Data can be discovered and parsed (understood) by humans and search algorithms. Data are associated by globally unique identifiers.<br>Accessible: Data can be retrieved by a standardized protocol.<br>Interoperable: Datasets can be combined (enriched data), data formats fit within existing workflows.<br>Reusable: Data and metadata are comprehensively described, so that they can be used in novel ways in future studies (converted and calibrated for future formats). Provenance, usage rights, and compliance with community standards are documented in metadata. | (Blumberg et al., 2021; Collins J.E. et al., 2021)                  |
| The Global Genome Biodiversity Network (GGBN) Data Standard                      | Developed by the Global Genome Biodiversity Network to complement the DwC, ABCD, and MlxS data standards.                                                                                                                                                                                                                                                                                                                                                                                                                                                                                  | (Droege et al., 2016)                                               |
| ISO Standards                                                                    | Examples of ISO standards and implementation guides describing collection management and IT infrastructure requirements and recommendations for biobanks:<br>ISO/TR 79, ISO/TS 22692, ISO/TR 3985, ISO 9001, ISO/DIS 16677-1, ISO 18209-1, ISO 20184-2, ISO 20387, ISO 20395, ISO/TS 20388, ISO 20658, ISO 20691, ISO 21709, ISO 21710, ISO 21899, ISO/TR 22758, ISO/TS 23105, ISO/TS 23357, ISO/TS 23494-1, ISO 24088-1, ISO 24190, ISO 24603                                                                                                                                             | (González et al., 2018; ISO, n.d.; Jaroszewska et al., 2023)        |
| Marine Biodiversity Observation Network (MBON)                                   | MBON works to grow monitoring program partnerships, promote best practices for data collection and sharing, and improve interoperability between biological and physicochemical data portals and approaches.                                                                                                                                                                                                                                                                                                                                                                               | (Canonico et al., 2019)                                             |
| Marine Microbial Biodiversity, Bioinformatics and Biotechnology (M2B3) standards | A set of standards for contextual metadata associated with marine molecular samples, inspired by the MlxS and Darwin Core. The M2B3 standard is designed to improve interconnectivity between molecular sequence data and environmental data, including physicochemical variables.                                                                                                                                                                                                                                                                                                         | (ten Hoopen et al., 2015)                                           |
| Minimum Information                                                              | Designed for human biomedical research, this standard covers information on biobanks,                                                                                                                                                                                                                                                                                                                                                                                                                                                                                                      | (LaBaer et al., 2018)                                               |

|                                                                                                                                             |                                                                                                                                                                                                                                                                                                                                                                                                                                                                                                                                                                                                                                                                                                                                                                                                                                                                                                                                                                                                                                                                                                                                                                                                                                                                                                                                  |                                                                                                                     |
|---------------------------------------------------------------------------------------------------------------------------------------------|----------------------------------------------------------------------------------------------------------------------------------------------------------------------------------------------------------------------------------------------------------------------------------------------------------------------------------------------------------------------------------------------------------------------------------------------------------------------------------------------------------------------------------------------------------------------------------------------------------------------------------------------------------------------------------------------------------------------------------------------------------------------------------------------------------------------------------------------------------------------------------------------------------------------------------------------------------------------------------------------------------------------------------------------------------------------------------------------------------------------------------------------------------------------------------------------------------------------------------------------------------------------------------------------------------------------------------|---------------------------------------------------------------------------------------------------------------------|
| <p>About Biobank Data Sharing (MIABIS) (<a href="https://www.bbmri-eric.eu/howtomiabis/">https://www.bbmri-eric.eu/howtomiabis/</a>)</p>    | <p>collections, projects, and individual samples. However, (as of 2018) MIABIS does not cover sample collection, storage, or shipment information.</p>                                                                                                                                                                                                                                                                                                                                                                                                                                                                                                                                                                                                                                                                                                                                                                                                                                                                                                                                                                                                                                                                                                                                                                           |                                                                                                                     |
| <p>Minimum information about any sequence standard (MIxS)</p>                                                                               | <p>Genome Standards Consortium MIxS metadata standard, which includes the more specific marker genes (mImARKS) and metagenomes (mImS) standards. Some of the data fields are entered as free text, which can cause data divergence. For example, different users may enter different names for the same gene, or use slightly different technical concepts, definitions, or abbreviations, or perhaps describe parameters at different levels of detail. As a result, free text fields can be difficult to parse for search and analysis algorithms. Machine-readable formats are schema with clearly defined fields and allowed parameter values, that can be compared and filtered by algorithms. Standardization initiatives, such as the <a href="#">NMDC</a> initiative, are evolving metadata standards for microbiomes, with successive rounds of MIxS versions beginning to employ machine-readable schema.</p> <p>There are also efforts to find standard ways of connecting sequence data with abiotic data, such as chemical, physical, etc. observations. While major metagenomic data portals use MIxS checklists and ENVO standards, a system of globally unique data object identifiers and centralized identifier directories is needed to integrate biotic and abiotic databases and make marine data FAIR.</p> | <p>(Blumberg et al., 2021; Goodwin et al., 2017; Knight et al., 2018; Vangay et al., 2021; Yilmaz et al., 2011)</p> |
| <p>Minimum Information for an Omic Protocol (MIOP)</p>                                                                                      | <p>A proposed metadata standard to describe marine omic best practices and protocols. MIOP goals would be to help researchers discover and share fieldwork and laboratory procedures.</p>                                                                                                                                                                                                                                                                                                                                                                                                                                                                                                                                                                                                                                                                                                                                                                                                                                                                                                                                                                                                                                                                                                                                        | <p>(Samuel et al., 2021)</p>                                                                                        |
| <p>OBIS-ENV-DATA</p>                                                                                                                        | <p>Building on Darwin Core Archive (DwC-A) and GBIF practices, this data standard is designed to help link the quantitative and qualitative measurements and properties of biodiversity observations with abiotic measurements.</p>                                                                                                                                                                                                                                                                                                                                                                                                                                                                                                                                                                                                                                                                                                                                                                                                                                                                                                                                                                                                                                                                                              | <p>(Pooter et al., 2017)</p>                                                                                        |
| <p>Open Nomenclature (ON)</p>                                                                                                               | <p>ON is a vocabulary of taxonomic terms that is generally used by taxonomists to describe their own data. Term definitions and use are not standardized.</p>                                                                                                                                                                                                                                                                                                                                                                                                                                                                                                                                                                                                                                                                                                                                                                                                                                                                                                                                                                                                                                                                                                                                                                    | <p>(Sigovini et al., 2016)</p>                                                                                      |
| <p>ORCID</p>                                                                                                                                | <p>A global unique identifier, usually used to identify people. Notable use: Bionomia database.</p>                                                                                                                                                                                                                                                                                                                                                                                                                                                                                                                                                                                                                                                                                                                                                                                                                                                                                                                                                                                                                                                                                                                                                                                                                              | <p>(Bionomia, n.d.)</p>                                                                                             |
| <p>Public Participation in Scientific Research (PPSR) (<a href="https://core.citizenscience.org/">https://core.citizenscience.org/</a>)</p> | <p>A set of transdisciplinary data and metadata standards for citizen science.</p>                                                                                                                                                                                                                                                                                                                                                                                                                                                                                                                                                                                                                                                                                                                                                                                                                                                                                                                                                                                                                                                                                                                                                                                                                                               | <p>(PPSR Core   PPSR Core, n.d.)</p>                                                                                |
| <p>RRID</p>                                                                                                                                 | <p>A global unique identifier suitable for cross-referencing records residing in separate databases or</p>                                                                                                                                                                                                                                                                                                                                                                                                                                                                                                                                                                                                                                                                                                                                                                                                                                                                                                                                                                                                                                                                                                                                                                                                                       | <p>(RRID Initiative, n.d.)</p>                                                                                      |

|          |                                                                                                                                                                                                                         |                                                                        |
|----------|-------------------------------------------------------------------------------------------------------------------------------------------------------------------------------------------------------------------------|------------------------------------------------------------------------|
|          | datasets. Notable for being used by a number of publishers.                                                                                                                                                             |                                                                        |
| SciScore | A tool for reviewing the transparency of methods descriptions in research publications.                                                                                                                                 | (SciScore: The best methods review tool for scientific research, n.d.) |
| SeqDB    | The SeqDB application is built on the Darwin Core and MIxS standards and is used to track workflow and provenance chain from sampling and through genetic sequence analysis. It is available through the EMBL-EBI APIs. | (Bilkhu et al., 2017; Cook et al., 2019)                               |
| URI      | Specification for the creation of unique identifiers.                                                                                                                                                                   | (Berners-Lee et al., 2005)                                             |

## Bibliography

[Back To Table Of Contents](#)

- Aalto, N. J., Schweitzer, H. D., Krsmanovic, S., Campbell, K., Bernstein, H. C. (2022). Diversity and Selection of Surface Marine Microbiomes in the Atlantic-Influenced Arctic. *Frontiers in Microbiology*, 13. doi: [10.3389/fmicb.2022.892634](https://doi.org/10.3389/fmicb.2022.892634)
- Abdullah Al, M., Chen, H., Yan, X., Ren, K., Xue, Y., Shimeta, J., et al. (2024). Relic DNA confounds the results of DNA-based study on microeukaryotic succession in aquatic biofilms. *Ecological Indicators* 158, 111350. doi: [10.1016/j.ecolind.2023.111350](https://doi.org/10.1016/j.ecolind.2023.111350)
- Acinas, S. G., Sánchez, P., Salazar, G., Cornejo-Castillo, F. M., Sebastián, M., Logares, R., et al. (2021). Deep ocean metagenomes provide insight into the metabolic architecture of bathypelagic microbial communities. *Commun Biol* 4, 1–15. doi: [10.1038/s42003-021-02112-2](https://doi.org/10.1038/s42003-021-02112-2)
- Aïssi, M., Arcangeli, A., Crosti, R., Daly Yahia, M. N., Loussaïef, B., Moulins, A., et al. (2015). Cetacean occurrence and spatial distribution in the central Mediterranean Sea using ferries as platform of observation. *Russ J Mar Biol* 41, 343–350. doi: [10.1134/S1063074015050028](https://doi.org/10.1134/S1063074015050028)
- Alabia, I. D., García Molinos, J., Hirata, T., Mueter, F. J., David, C. L. (2023). Pan-Arctic marine biodiversity and species co-occurrence patterns under recent climate. *Scientific Reports*, 13(1), Article 1. doi: [10.1038/s41598-023-30943-y](https://doi.org/10.1038/s41598-023-30943-y)
- Alessi J., Bruccoleri, F., Cafaro, V. (2019). How citizens can encourage scientific research: The case study of bottlenose dolphins monitoring. *Ocean & Coastal Management*, 167, 9-19. doi: [10.1016/j.ocecoaman.2018.09.018](https://doi.org/10.1016/j.ocecoaman.2018.09.018)
- Alvisatos, A. P., Blaser, M. J., Brodie, E. L., Chun, M., Dangl, J. L., Donohue, T. J., et al. (2015). A unified initiative to harness Earth’s microbiomes. *Science* 350, 507–508. doi: [10.1126/science.aac8480](https://doi.org/10.1126/science.aac8480)
- Álvarez-Romero, J. G., Mills, M., Adams, V. M., Gurney, G. G., Pressey, R. L., Weeks, R., et al. (2018). Research advances and gaps in marine planning: towards a global database in systematic conservation planning. *Biological Conservation* 227, 369–382. doi: [10.1016/j.biocon.2018.06.027](https://doi.org/10.1016/j.biocon.2018.06.027)
- Amend, A., Burgaud, G., Cunliffe, M., Edgcomb, V. P., Ettinger, C. L., Gutiérrez, M. H., et al. (2019). Fungi in the Marine Environment: Open Questions and Unsolved Problems. *mBio* 10, e01189-18. doi: [10.1128/mBio.01189-18](https://doi.org/10.1128/mBio.01189-18)
- Amini, M., and Benson, J. D. (2023). Technologies for Vitrification Based Cryopreservation. *Bioengineering* 10, 508. doi: [10.3390/bioengineering10050508](https://doi.org/10.3390/bioengineering10050508)

Anderson, K. (2006). Does history count? *Endeavour* 30, 150–155. doi: [10.1016/j.endeavour.2006.11.002](https://doi.org/10.1016/j.endeavour.2006.11.002)

APECS (2024). Association of Polar Early Career Scientists - Diversity, Equity and Inclusion (DEI) - New resources available. Available at: <https://www.apecs.is/news/apecs-news/5262-diversity-equity-and-inclusion-dei-new-resources-available.html> [Accessed June 21, 2024]

Apprill, A., Miller, C. A., Moore, M. J., Durban, J. W., Fearnbach, H., and Barrett-Lennard, L. G. (2017). Extensive Core Microbiome in Drone-Captured Whale Blow Supports a Framework for Health Monitoring. *mSystems* 2, e00119-17. doi: [10.1128/mSystems.00119-17](https://doi.org/10.1128/mSystems.00119-17)

Arctic Biodiversity Data Service (n.d.). *Arctic Council*. Available at: <https://arctic-council.org/projects/arctic-biodiversity-data-service/> [Accessed January 22, 2025]

Arctic Council. (2019). *PAME: Policy: Meaningful Engagement of Indigenous Peoples and Local Communities in Marine Activities*. Available at: <https://pame.is/document-library/pame-reports-new/pame-ministerial-deliverables/2019-11th-arctic-council-ministerial-meeting-rovaniemi-finland/425-meaningful-engagement-of-indigenous-peoples-and-local-communities-in-marine-activities-mema-part-ii-findings-for-policy-makers/file> [Accessed December 1, 2023]

Arctos – Collaborative Collection Management Solution (n.d.). Available at: <https://arctosdb.org/> [Accessed May 31, 2024]

Arora, K., Kaur, P., Kumar, P., Singh, A., Patel, S. K. S., Li, X., et al. (2021). Valorization of Wastewater Resources Into Biofuel and Value-Added Products Using Microalgal System. *Frontiers in Energy Research* 9. doi: [10.3389/fenrg.2021.646571](https://doi.org/10.3389/fenrg.2021.646571)

Assemble+ (n.d.). Available at: <https://www.vliz.be/projects/assembleplus/home.html> [Accessed June 16, 2024]

Association for Advancing and Participatory Sciences (n.d.). Resources - Association for Advancing Participatory Sciences. *Association for Advancing Participatory Sciences*. Available at: <https://participatorysciences.org/resources/> [Accessed January 29, 2024]

Astthorsson, O. S., Gislason, A., Jonsson, S. (2007). Climate variability and the Icelandic marine ecosystem. *Deep Sea Research Part II: Topical Studies in Oceanography*, 54(23–26), 2456–2477. doi: [10.1016/j.dsr2.2007.07.030](https://doi.org/10.1016/j.dsr2.2007.07.030)

Astrin, J., Zhou, X., and Misof, B. (2013). The importance of biobanking in molecular taxonomy, with proposed definitions for vouchers in a molecular context. In: Nagy Z.T., Backeljau T., De Meyer M., Jordaens K. (Eds) *DNA barcoding: a practical tool for fundamental and applied biodiversity research*. *ZooKeys* 365, 67–70. doi: [10.3897/zookeys.365.5875](https://doi.org/10.3897/zookeys.365.5875)

Bakker, F. T., Antonelli, A., Clarke, J. A., Cook, J. A., Edwards, S. V., Ericson, P. G. P., Faurby, S., Ferrand, N., Gelang, M., Gillespie, R. G., Irestedt, M., Lundin,

- K., Larsson, E., Matos-Maraví, P., Müller, J., Proschwitz, T. von, Roderick, G. K., Schliep, A., Wahlberg, N., ... Källersjö, M. (2020). The Global Museum: Natural history collections and the future of evolutionary science and public education. *PeerJ*, 8, e8225. <https://doi.org/10.7717/peerj.8225>
- Becker, P., Bosschaerts, M., Chaerle, P., Daniel, H.-M., Hellemans, A., Olbrechts, A., Rigouts, L., Wilmotte, A., & Hendrickx, M. (2019). Public Microbial Resource Centers: Key Hubs for Findable, Accessible, Interoperable, and Reusable (FAIR) Microorganisms and Genetic Materials. *Applied and Environmental Microbiology*, 85(21), e01444-19. <https://doi.org/10.1128/AEM.01444-19>
- Bentley, A., Thiers, B., Moser, W. E., Watkins-Colwell, G. J., Zimkus, B. M., Monfils, A. K., et al. (2024). Community Action: Planning for Specimen Management in Funding Proposals. *BioScience*, biae032. doi: [10.1093/biosci/biae032](https://doi.org/10.1093/biosci/biae032)
- Berg, G., Rybakova, D., Fischer, D., Cernava, T., Vergès, M.-C. C., Charles, T., et al. (2020). Microbiome definition re-visited: old concepts and new challenges. *Microbiome* 8, 103. doi: [10.1186/s40168-020-00875-0](https://doi.org/10.1186/s40168-020-00875-0)
- Bernard, A., Rodrigues, A. S. L., Cazalis, V., and Grémillet, D. (2021). Toward a global strategy for seabird tracking. *Conservation Letters* 14, e12804. doi: [10.1111/conl.12804](https://doi.org/10.1111/conl.12804)
- Berners-Lee, T., Fielding, R. T., and Masinter, L. M. (2005). Uniform Resource Identifier (URI): Generic Syntax. Internet Engineering Task Force doi: [10.17487/RFC3986](https://doi.org/10.17487/RFC3986)
- Bertulli, C. G., Guéry, L., McGinty, N., Suzuki, A., Brannan, N., Marques, T., et al. (2018). Capture-recapture abundance and survival estimates of three cetacean species in Icelandic coastal waters using trained scientist-volunteers. *Journal of Sea Research* 131, 22–31. doi: [10.1016/j.seares.2017.10.001](https://doi.org/10.1016/j.seares.2017.10.001)
- Best, B. P. (2015). Cryoprotectant Toxicity: Facts, Issues, and Questions. *Rejuvenation Research* 18, 422–436. doi: [10.1089/rej.2014.1656](https://doi.org/10.1089/rej.2014.1656)
- Bhatia, M. P., Waterman, S., Burgess, D. O., Williams, P. L., Bundy, R. M., Mellett, T., Roberts, M., Bertrand, E. M. (2021). Glaciers and Nutrients in the Canadian Arctic Archipelago Marine System. *Global Biogeochemical Cycles*, 35(8), e2021GB006976. <https://doi.org/10.1029/2021GB006976>
- Biclot, A., Huys, G. R. B., Bacigalupe, R., D'hoë, K., Vandeputte, D., Falony, G., et al. (2022). Effect of cryopreservation medium conditions on growth and isolation of gut anaerobes from human faecal samples. *Microbiome* 10, 80. doi: [10.1186/s40168-022-01267-2](https://doi.org/10.1186/s40168-022-01267-2)
- Bilkhu, S., El-Kayssi, N., Poff, M., Bushara, A., Oh, M., Giustizia, J., et al. (2017). SeqDB: Biological Collection Management with Integrated DNA Sequence Tracking. *Biodiversity Information Science and Standards* 1, e20608. doi: [10.3897/tdwgproceedings.1.20608](https://doi.org/10.3897/tdwgproceedings.1.20608)



Biodiversity Collections Network – Building a community to advance and sustain digitized biocollections (n.d.). Available at: <https://bcon.aibs.org/>

[Accessed July 14, 2024]

Biodiversity Information Standards (TDWG) (n.d.). Available at: <https://www.tdwg.org/> [Accessed May 30, 2024]

Bionomia: Rationale (n.d.). Available at: <https://bionomia.net/about> [Accessed July 16, 2024]

BirdLife International (2023). Seabird Tracking Database. Available at: <https://www.seabirdtracking.org/> [Accessed September 21, 2024]

Biteen, J. S., Blainey, P. C., Cardon, Z. G., Chun, M., Church, G. M., Dorrestein, P. C., et al. (2016). Tools for the Microbiome: Nano and Beyond. *ACS Nano* 10, 6–37. doi: [10.1021/acsnano.5b07826](https://doi.org/10.1021/acsnano.5b07826)

Bledsoe, E. K., Burant, J. B., Higinio, G. T., Roche, D. G., Binning, S. A., Finlay, K., et al. (2022). Data rescue: saving environmental data from extinction. *Proceedings of the Royal Society B: Biological Sciences* 289, 20220938. doi: [10.1098/rspb.2022.0938](https://doi.org/10.1098/rspb.2022.0938)

Bledsoe, M. J., Watson, P. H., Hewitt, R. E., Catchpoole, D. R., Grizzle, W. E. (2019). Biobank: What's in a Name? *Biopreservation and Biobanking*, 17(3), 204–208. <https://doi.org/10.1089/bio.2019.29053.mjb>

Blockley, A., Elliott, D. R., Roberts, A. P., Sweet, M. (2017). Symbiotic Microbes from Marine Invertebrates: Driving a New Era of Natural Product Drug Discovery. *Diversity*, 9(4), Article 4. <https://doi.org/10.3390/d9040049>

Blumberg, K. L., Ponsero, A. J., Bomhoff, M., Wood-Charlson, E. M., DeLong, E. F., and Hurwitz, B. L. (2021). Ontology-enriched specifications enabling findable, accessible, interoperable, and reusable marine metagenomic datasets in cyberinfrastructure systems. *Frontiers in Microbiology* 12. doi: [10.3389/fmicb.2021.765268](https://doi.org/10.3389/fmicb.2021.765268)

Bolton, R. L., Mooney, A., Pettit, M. T., Bolton, A. E., Morgan, L., Drake, G. J., et al. (2022). Resurrecting biodiversity: advanced assisted reproductive technologies and biobanking. *Reproduction and Fertility* 3, R121–R146. doi: [10.1530/RAF-22-0005](https://doi.org/10.1530/RAF-22-0005)

Borges, N., Keller-Costa, T., Sanches-Fernandes, G. M. M., Louvado, A., Gomes, N. C. M., and Costa, R. (2021). Bacteriome Structure, Function, and Probiotics in Fish Larviculture: The Good, the Bad, and the Gaps. *Annual Review of Animal Biosciences* 9, 423–452. doi: [10.1146/annurev-animal-062920-113114](https://doi.org/10.1146/annurev-animal-062920-113114)

Boundy-Mills, K., McCluskey, K., Elia, P., Glaeser, J. A., Lindner, D. L., Nobles, D. R., et al. (2020). Preserving US microbe collections sparks future discoveries. *J Appl Microbiol* 129, 162–174. doi: [10.1111/jam.14525](https://doi.org/10.1111/jam.14525)

- Bowser, A., Cooper, C., Sherbinin, A. de, Wiggins, A., Brenton, P., Chuang, T.-R., et al. (2020). Still in Need of Norms: The State of the Data in Citizen Science. *Citizen Science: Theory and Practice* 5 (1): 18, 1–16. doi: [10.5334/cstp.303](https://doi.org/10.5334/cstp.303)
- Breitwieser, F. P., Lu, J., and Salzberg, S. L. (2019). A review of methods and databases for metagenomic classification and assembly. *Briefings in Bioinformatics* 20, 1125–1136. doi: [10.1093/bib/bbx120](https://doi.org/10.1093/bib/bbx120)
- Brennan, G. L., and Logares, R. (2023). Tracking contemporary microbial evolution in a changing ocean. *Trends in Microbiology* 31, 336–345. doi: [10.1016/j.tim.2022.09.001](https://doi.org/10.1016/j.tim.2022.09.001)
- Bruno, S., Coppola, D., di Prisco, G., Giordano, D., and Verde, C. (2019). Enzymes from Marine Polar Regions and Their Biotechnological Applications. *Marine Drugs* 17, 544. doi: [10.3390/md17100544](https://doi.org/10.3390/md17100544)
- Buckner, J. C., Sanders, R. C., Faircloth, B. C., and Chakrabarty, P. (2021). The critical importance of vouchers in genomics. *eLife* 10, e68264. doi: [10.7554/eLife.68264](https://doi.org/10.7554/eLife.68264)
- Burgess, H. K., DeBey, L. B., Froehlich, H. E., Schmidt, N., Theobald, E. J., Ettinger, A. K., et al. (2017). The science of citizen science: Exploring barriers to use as a primary research tool. *Biological Conservation* 208, 113–120. doi: [10.1016/j.biocon.2016.05.014](https://doi.org/10.1016/j.biocon.2016.05.014)
- Burot, C., Amiraux, R., Bonin, P., Guasco, S., Babin, M., Joux, F., et al. (2021). Viability and stress state of bacteria associated with primary production or zooplankton-derived suspended particulate matter in summer along a transect in Baffin Bay (Arctic Ocean). *Science of The Total Environment* 770, 145252. doi: [10.1016/j.scitotenv.2021.145252](https://doi.org/10.1016/j.scitotenv.2021.145252)
- Buschman, V. Q. (2022). Framing co-productive conservation in partnership with Arctic Indigenous peoples. *Conservation Biology* 36, e13972. doi: [10.1111/cobi.13972](https://doi.org/10.1111/cobi.13972)
- Canonico, G., Buttigieg, P. L., Montes, E., Muller-Karger, F. E., Stepien, C., Wright, D., et al. (2019). Global observational needs and resources for marine biodiversity. *Frontiers in Marine Science* 6. doi: [10.3389/fmars.2019.00367](https://doi.org/10.3389/fmars.2019.00367)
- Carlo, N. (2020). Arctic Observing: Indigenous Peoples' History, Perspectives, and Approaches for Partnership. University of Alaska Fairbanks: Center For Arctic Policy Studies Available at: [https://www.uaf.edu/caps/our-work/Carlo\\_Arctic-Observing\\_Indigenous-Peoples-History\\_CAPS\\_5MAR2020.pdf](https://www.uaf.edu/caps/our-work/Carlo_Arctic-Observing_Indigenous-Peoples-History_CAPS_5MAR2020.pdf) [Accessed March 21, 2024]
- Carroll, I. M., Ringel-Kulka, T., Siddle, J. P., Klaenhammer, T. R., and Ringel, Y. (2012). Characterization of the fecal microbiota using high-throughput

- sequencing reveals a stable microbial community during storage. *PLoS One* 7, e46953. doi: [10.1371/journal.pone.0046953](https://doi.org/10.1371/journal.pone.0046953)
- Cary, S. C., and Fierer, N. (2014). The importance of sample archiving in microbial ecology. *Nat Rev Microbiol* 12, 789–790. doi: [10.1038/nrmicro3382](https://doi.org/10.1038/nrmicro3382)
- Cassotta, S., and Goodsite, M. (2024). Deep-seabed mining: an environmental concern and a holistic social environmental justice issue. *Frontiers in Ocean Sustainability* 2. Available at: <https://www.frontiersin.org/articles/10.3389/focsu.2024.1355965> [Accessed May 14, 2024]
- Catalá, T. S., Reche, I., Álvarez, M., Khatiwala, S., Guallart, E. F., Benítez-Barrios, V. M., et al. (2015). Water mass age and aging driving chromophoric dissolved organic matter in the dark global ocean. *Global Biogeochemical Cycles* 29, 917–934. doi: [10.1002/2014GB005048](https://doi.org/10.1002/2014GB005048)
- Cetacean Tissue Bank (n.d.). *National Museum of Ireland*. Available at: <https://www.museum.ie/en-IE/Museums/Natural-History/Projects/Cetacean-Tissue-Bank> [Accessed June 16, 2024]
- Chandler, M., See, L., Copas, K., Bonde, A. M. Z., López, B. C., Danielsen, F., et al. (2017). Contribution of citizen science towards international biodiversity monitoring. *Biological Conservation* 213, 280–294. doi: [10.1016/j.biocon.2016.09.004](https://doi.org/10.1016/j.biocon.2016.09.004)
- Chang, T., and Zhao, G. (2021). Ice Inhibition for Cryopreservation: Materials, Strategies, and Challenges. *Advanced Science* 8, 2002425. doi: [10.1002/advs.202002425](https://doi.org/10.1002/advs.202002425)
- Chaplow, J. S., Bond, A. L., Koschorreck, J., Rüdell, H., and Shore, R. F. (2021). “6 - The role of environmental specimen banks in monitoring environmental contamination,” in *Monitoring Environmental Contaminants* Environmental Contaminants., ed. S. Johnson (Elsevier), 123–138. doi: [10.1016/B978-0-444-64335-3.00002-5](https://doi.org/10.1016/B978-0-444-64335-3.00002-5)
- CIM-UVIGO (2023). The CIM-UVigo leads the relaunch of the European Blue Biobank with more than 330,000 euros of funding. *Centro de Investigación Mariña da Universidade de Vigo | CIM - UVigo*. Available at: <https://cim.uvigo.gal/en/2023/02/the-cim-uvigo-leads-the-relaunch-of-the-european-blue-biobank-with-more-than-330000-euros-of-funding/> [Accessed July 15, 2024]
- Citta, J. J., Lowry, L. F., Quakenbush, L. T., Kelly, B. P., Fischbach, A. S., London, J. M., et al. (2018). A multi-species synthesis of satellite telemetry data in the Pacific Arctic (1987–2015): Overlap of marine mammal distributions and core use areas. *Deep Sea Research Part II: Topical Studies in Oceanography* 152, 132–153. doi: [10.1016/j.dsr2.2018.02.006](https://doi.org/10.1016/j.dsr2.2018.02.006)
- Clarke, A. G. (2009). The Frozen Ark Project: the role of zoos and aquariums in preserving the genetic material of threatened animals. *International Zoo Yearbook* 43, 222–230. doi: [10.1111/j.1748-1090.2008.00074.x](https://doi.org/10.1111/j.1748-1090.2008.00074.x)

- Clayton, S., Alexander, H., Graff, J. R., Poulton, N. J., Thompson, L. R., Benway, H., et al. (2022). Bio-GO-SHIP: The Time Is Right to Establish Global Repeat Sections of Ocean Biology. *Frontiers in Marine Science* 8. Available at: <https://www.frontiersin.org/articles/10.3389/fmars.2021.767443> [Accessed June 8, 2024]
- Cockell, C. S., and Jones, H. L. (2009). Advancing the case for microbial conservation. *Oryx* 43 (4), 520–526. doi: [10.1017/S0030605309990111](https://doi.org/10.1017/S0030605309990111). Available at: <https://www.cambridge.org/core/journals/oryx/article/advancing-the-case-for-microbial-conservation/0F93FFEE659C31AF4E3B91EEFB944657>
- Colaço, A., Rapp, H. T., Companyà-Llovet, N., Pham, C. K. (2022). Bottom trawling in sponge grounds of the Barents Sea (Arctic Ocean): A functional diversity approach. *Deep Sea Research Part I: Oceanographic Research Papers*, 183, 103742. <https://doi.org/10.1016/j.dsr.2022.103742>
- Colella, J. P., Stephens, R. B., Campbell, M. L., Kohli, B. A., Parsons, D. J., and Mclean, B. S. (2021). The Open-Specimen Movement. *BioScience* 71, 405–414. doi: [10.1093/biosci/biaa146](https://doi.org/10.1093/biosci/biaa146)
- Colella, J. P., Talbot, S. L., Brochmann, C., Taylor, E. B., Hoberg, E. P., and Cook, J. A. (2020). Conservation Genomics in a Changing Arctic. *Trends in Ecology & Evolution* 35, 149–162. doi: [10.1016/j.tree.2019.09.008](https://doi.org/10.1016/j.tree.2019.09.008)
- Collins, J. E., Harden-Davies, H., Jaspars, M., Thiele, T., Vanagt, T., & Huys, I. (2019). Inclusive innovation: Enhancing global participation in and benefit sharing linked to the utilization of marine genetic resources from areas beyond national jurisdiction. *Marine Policy*, 109, 103696. <https://doi.org/10.1016/j.marpol.2019.103696>
- Collins, T., and Margesin, R. (2019). Psychrophilic lifestyles: mechanisms of adaptation and biotechnological tools. *Appl Microbiol Biotechnol* 103, 2857–2871. doi: [10.1007/s00253-019-09659-5](https://doi.org/10.1007/s00253-019-09659-5)
- Collins, J. E., Rabone, M., Vanagt, T., Amon, D. J., Gobin, J., and Huys, I. (2021). Strengthening the global network for sharing of marine biological collections: recommendations for a new agreement for biodiversity beyond national jurisdiction. *ICES Journal of Marine Science* 78, 305–314. doi: [10.1093/icesjms/fsaa227](https://doi.org/10.1093/icesjms/fsaa227)
- Collins, F. W. J., Walsh, C. J., Gomez-Sala, B., Guijarro-García, E., Stokes, D., Jakobsdóttir, K. B., Kristjánsson, K., Burns, F., Cotter, P. D., Rea, M. C., Hill, C., Ross, R. P. (2021). The microbiome of deep-sea fish reveals new microbial species and a sparsity of antibiotic resistance genes. *Gut Microbes*, 13(1), 1921924. <https://doi.org/10.1080/19490976.2021.1921924>
- Comizzoli, P. (2017). Biobanking and fertility preservation for rare and endangered species. *Animal Reproduction* 14, 30–33. doi: [10.21451/1984-3143-AR889](https://doi.org/10.21451/1984-3143-AR889)

- Compton, R., Banks, A., Goodwin, L., and Hooker, S. K. (2007). Pilot cetacean survey of the sub-Arctic North Atlantic utilizing a cruise-ship platform. *Journal of the Marine Biological Association of the United Kingdom* 87, 321–325. doi: [10.1017/S0025315407054781](https://doi.org/10.1017/S0025315407054781)
- Cook, J. A., Galbreath, K. E., Bell, K. C., Campbell, M. L., Carrière, S., Colella, J. P., Dawson, N. G., Dunnum, J. L., Eckerlin, R. P., Fedorov, V., Greiman, S. E., Haas, G. M. S., Haukisalmi, V., Henttonen, H., Hope, A. G., Jackson, D., Jung, T. S., Koehler, A. V., Kinsella, J. M., ... Hoberg, E. P. (2017). The Beringian Coevolution Project: Holistic collections of mammals and associated parasites reveal novel perspectives on evolutionary and environmental change in the North. *Arctic Science*, 3(3), 585–617. <https://doi.org/10.1139/as-2016-0042>
- Cook, C. E., Lopez, R., Stroe, O., Cochrane, G., Brooksbank, C., Birney, E., et al. (2019). The European Bioinformatics Institute in 2018: tools, infrastructure and training. *Nucleic Acids Research* 47, D15–D22. doi: [10.1093/nar/gky1124](https://doi.org/10.1093/nar/gky1124)
- Corrales, C., and Astrin, J. J. eds. (2023). *Biodiversity Biobanking – a Handbook on Protocols and Practices*. Pensoft, Advanced Books Available at: <https://ab.pensoft.net/article/101876/> [Accessed April 6, 2023]
- Corthals, A., and Desalle, R. (2005). An Application of Tissue and DNA Banking for Genomics and Conservation: The Ambrose Monell Cryo-Collection (AMCC). *Systematic Biology* 54, 819–823. doi: [10.1080/10635150590950353](https://doi.org/10.1080/10635150590950353)
- Costello, M. J., Horton, T., and Kroh, A. (2018). Sustainable Biodiversity Databasing: International, Collaborative, Dynamic, Centralised. *Trends in Ecology & Evolution* 33, 803–805. doi: [10.1016/j.tree.2018.08.006](https://doi.org/10.1016/j.tree.2018.08.006)
- Costello, M. J., Michener, W. K., Gahegan, M., Zhang, Z.-Q., Bourne, P. E. (2013). Biodiversity data should be published, cited, and peer reviewed. *Trends in Ecology & Evolution*, 28(8), 454–461. <https://doi.org/10.1016/j.tree.2013.05.002>
- Cryobanking Marine Organisms (JRA2) | Assemble+ (n.d.). Available at: <https://www.vliz.be/projects/assembleplus/node/1879.html> [Accessed July 30, 2024]
- Cubaynes, H. C., Fretwell, P. T., Bamford, C., Gerrish, L., Jackson, J. A. (2019). Whales from space: Four mysticete species described using new VHR satellite imagery. *Marine Mammal Science*, 35(2), 466–491. <https://doi.org/10.1111/mms.12544>
- CyberTracker (n.d.). *CyberTracker*. Available at: <https://cybertracker.org/> [Accessed January 22, 2025]
- Damerow, J. E., Varadharajan, C., Boye, K., Brodie, E. L., Burrus, M., Chadwick, K. D., et al. (2021). Sample Identifiers and Metadata to Support Data Management and Reuse in Multidisciplinary Ecosystem Sciences. *Data Science Journal* 20. doi: [10.5334/dsj-2021-011](https://doi.org/10.5334/dsj-2021-011)

- Danielson, S. L., Grebmeier, J. M., Iken, K., Berchok, C., Britt, L., Dunton, K. H., et al. (2022). Monitoring Alaskan Arctic Shelf Ecosystems Through Collaborative Observation Networks. *Oceanography* 35(3-4), 198–209. doi: [10.5670/oceanog.2022.119](https://doi.org/10.5670/oceanog.2022.119)
- Danovaro, R., Corinaldesi, C., Dell'Anno, A., Fuhrman, J. A., Middelburg, J. J., Noble, R. T., Suttle, C. A. (2011). Marine viruses and global climate change. *FEMS Microbiology Reviews*, 35(6), 993–1034. <https://doi.org/10.1111/j.1574-6976.2010.00258.x>
- Darwin Core Archives – How-to Guide :: GBIF IPT User Manual (n.d.). Available at: <https://ipt.gbif.org/manual/en/ipt/latest/dwca-guide> [Accessed May 7, 2024]
- Dasgupta, P. (2021). *The economics of biodiversity: The Dasgupta review: full report*. London: HM Treasury. Available online: <https://www.gov.uk/government/publications/final-report-the-economics-of-biodiversity-the-dasgupta-review>
- Davidson, E., Currie, J. J., Stack, S. H., Kaufman, G. D., Martinez, E. (2014). Whale and dolphin tracker, a web-application for recording cetacean sighting data in real-time: Example using opportunistic observations reported in 2013 from tour vessels off Maui, Hawai`i. Report to the International Whaling Commission 65b: 1-17.
- Davies, T. E., Carneiro, A. P. B., Tarzia, M., Wakefield, E., Hennicke, J. C., Frederiksen, M., Hansen, E. S., Campos, B., Hazin, C., Lascelles, B., Anker-Nilssen, T., Arnardóttir, H., Barrett, R. T., Biscoito, M., Bollache, L., Boulinier, T., Catry, P., Ceia, F. R., Chastel, O., ... Dias, M. P. (2021). Multispecies tracking reveals a major seabird hotspot in the North Atlantic. *Conservation Letters*, 14(5), e12824. <https://doi.org/10.1111/conl.12824>
- Debode, F., Caulier, S., Demeter, S., Dubois, B., Gelhay, V., Hulin, J., et al. (2024). Roadmap for the integration of environmental microbiomes in risk assessments under EFSA's remit. *EFSA* 21, 8602E. doi: [10.2903/sp.efsa.2024.EN-8602](https://doi.org/10.2903/sp.efsa.2024.EN-8602)
- Dedeurwaerdere, T. (2010). Global microbial commons: institutional challenges for the global exchange and distribution of microorganisms in the life sciences. *Research in Microbiology* 161, 414–421. doi: [10.1016/j.resmic.2010.04.012](https://doi.org/10.1016/j.resmic.2010.04.012)
- Deep Sea Explorers - Zooniverse (n.d.). Available at: <https://www.zooniverse.org/projects/reinforce/deep-sea-explorers> [Accessed January 29, 2024].
- Delgado, A. (2021). Microbial Extractions: Sequence-based Bioprospecting, Augmented Promises, and Elusive Politics. *Science, Technology, & Human Values*, 01622439211055693. <https://doi.org/10.1177/01622439211055693>
- Desai, B. H., and Sidhu, B. K. (2020). International Courts and Tribunals – the New Environmental Sentinels in International Law. *Environmental Policy and Law* 50, 17–33. doi: [10.3233/EPL-200195](https://doi.org/10.3233/EPL-200195).

De Vero, L., Boniotti, M. B., Budroni, M., Buzzini, P., Cassanelli, S., Comunian, R., et al. (2019). Preservation, Characterization and Exploitation of Microbial Biodiversity: The Perspective of the Italian Network of Culture Collections. *Microorganisms* 7, 685. doi: 10.3390/microorganisms7120685.

Distributed System of Scientific Collections – DiSSCo (n.d.). *DiSSCo*. Available at: <https://www.dissco.eu/> [Accessed May 30, 2024].

Dorrell, R. G., Kuo, A., Füssy, Z., Richardson, E. H., Salamov, A., Zarevski, N., Freyria, N. J., Ibarbalz, F. M., Jenkins, J., Karlusich, J. J. P., Steindorff, A. S., Edgar, R. E., Handley, L., Lail, K., Lipzen, A., Lombard, V., McFarlane, J., Nef, C., Vanclová, A. M. N., ... Lovejoy, C. (2023). Convergent evolution and horizontal gene transfer in Arctic Ocean microalgae. *Life Science Alliance*, 6(3). <https://doi.org/10.26508/lsa.202201833>

Droege et al. (2016): The Global Genome Biodiversity Network (GGBN) Standard Specification. DATABASE. doi: 10.1093/database/baw125

DSMZ (2024). Leibniz Institute DSMZ: Microbiome and Collective Deposits. Available at: <https://www.dsmz.de/collection/deposit/open-collection/microorganisms/microbiome-and-collective-deposits> [Accessed June 26, 2024].

Duarte, C. M. (2015). Seafaring in the 21st Century: The Malaspina 2010 Circumnavigation Expedition. *Limnology and Oceanography Bulletin* 24, 11–14. doi: [10.1002/lob.10008](https://doi.org/10.1002/lob.10008).

Dubilier, N., McFall-Ngai, M., & Zhao, L. (2015). Microbiology: Create a global microbiome effort. *Nature*, 526, 631–634. doi: [10.1038/526631a](https://doi.org/10.1038/526631a)

Earth HoloGenome Initiative (2024). Home. Available at: <http://www.earthhologenome.org/index.html> [Accessed November 26, 2023].

EAZA (2024). EAZA Biobank » EAZA. Available at: <https://www.eaza.net/conservation/research/eaza-biobank/> [Accessed June 5, 2024].

EBB (2024). EBB – an EMBRC project. Available at: <https://www.bluebiobank.eu/> [Accessed September 20, 2022].

eBird (2023). The eBird Review Process. Available online at: <https://support.ebird.org/en/support/solutions/articles/48000795278-the-ebird-review-process> (Accessed February 1, 2024).

ECCO (n.d.). Who We Are | ECCO. Available at: <https://www.eccosite.org/who-we-are/> [Accessed March 4, 2022].

Edwards, A., Cameron, K.A., Cook, J.M., Debonnaire, A.R., Furness, E., Hay, M.C., Rassner, S.M. (2020). Microbial genomics amidst the Arctic crisis. *Microb. Gen.*, 6, e000375. <https://doi.org/10.1099/mgen.0.000375>



- Eirin-Lopez, J. M., and Putnam, H. M. (2019). Marine Environmental Epigenetics. *Annual Review of Marine Science* 11, 335–368. doi: [10.1146/annurev-marine-010318-095114](https://doi.org/10.1146/annurev-marine-010318-095114).
- Elliott, M. J., Poelen, J. H., and Fortes, J. A. B. (2020). Toward reliable biodiversity dataset references. *Ecological Informatics* 59, 101132. doi: [10.1016/j.ecoinf.2020.101132](https://doi.org/10.1016/j.ecoinf.2020.101132).
- Emerson, J. B., Adams, R. I., Román, C. M. B., Brooks, B., Coil, D. A., Dahlhausen, K., et al. (2017). Schrödinger’s microbes: Tools for distinguishing the living from the dead in microbial ecosystems. *Microbiome* 5, 86. doi: [10.1186/s40168-017-0285-3](https://doi.org/10.1186/s40168-017-0285-3).
- EMBL (2024). TREC – An expedition to study coastal ecosystems and their response to the environment, from molecules to communities. Available at: <https://www.embl.org/about/info/trec/> [Accessed May 24, 2024].
- EMBRC (2020). EBB: European Marine Biological Resource Centre Biobank | EMBRC. Available at: <https://www.embrc.eu/collaborative-projects/ebb-european-marine-biological-resource-centre-biobank> [Accessed April 11, 2024].
- Fadeev, E., Cardozo-Mino, M. G., Rapp, J. Z., Bienhold, C., Salter, I., Salman-Carvalho, V., et al. (2021). Comparison of Two 16S rRNA Primers (V3–V4 and V4–V5) for Studies of Arctic Microbial Communities. *Frontiers in Microbiology* 12. doi: [10.3389/fmicb.2021.637526](https://doi.org/10.3389/fmicb.2021.637526).
- Felden, J., Möller, L., Schindler, U., Huber, R., Schumacher, S., Koppe, R., et al. (2023). PANGAEA - Data Publisher for Earth & Environmental Science. *Sci Data* 10, 347. doi: [10.1038/s41597-023-02269-x](https://doi.org/10.1038/s41597-023-02269-x).
- Fischer, P., Brix, H., Baschek, B., Kraberg, A., Brand, M., Cisewski, B., et al. (2020). Operating Cabled Underwater Observatories in Rough Shelf-Sea Environments: A Technological Challenge. *Frontiers in Marine Science* 7. Available at: <https://www.frontiersin.org/articles/10.3389/fmars.2020.00551> [Accessed June 16, 2024].
- Flaviani, F., Schroeder, D. C., Lebet, K., Balestreri, C., Highfield, A. C., Schroeder, J. L., Thorpe, S. E., Moore, K., Pasckiewicz, K., Pfaff, M. C., Rybicki, E. P. (2018). Distinct Oceanic Microbiomes From Viruses to Protists Located Near the Antarctic Circumpolar Current. *Frontiers in Microbiology*, 9. <https://doi.org/10.3389/fmicb.2018.01474>
- Fontaine, B., Perrard, A., and Bouchet, P. (2012). 21 years of shelf life between discovery and description of new species. *Current Biology* 22, R943–R944. doi: [10.1016/j.cub.2012.10.029](https://doi.org/10.1016/j.cub.2012.10.029).
- Ford, J. S., Myers, R. A. (2008). A Global Assessment of Salmon Aquaculture Impacts on Wild Salmonids. *PLoS Biology*, 6(2), e33. <https://doi.org/10.1371/journal.pbio.0060033>



- Franz, M., Whyte, L., Atwood, T. C., Laidre, K. L., Roy, D., Watson, S. E., Góngora, E., McKinney, M. A. (2022). Distinct gut microbiomes in two polar bear subpopulations inhabiting different sea ice ecoregions. *Scientific Reports*, 12(1), Article 1. <https://doi.org/10.1038/s41598-021-04340-2>
- Fredston, A. L., and Lowndes, J. S. S. (2024). Welcoming More Participation in Open Data Science for the Oceans. *Annual Review of Marine Science* 16, 537–549. doi: [10.1146/annurev-marine-041723-094741](https://doi.org/10.1146/annurev-marine-041723-094741).
- Fritze, D. (2009). A common basis for facilitated legitimate exchange of biological materials proposed by the European Culture Collections' Organisation. *International Journal of the Commons*, 4 (1), 507-527. doi: [10.18352/ijc.153](https://doi.org/10.18352/ijc.153)
- Galand, P. E., Casamayor, E. O., Kirchman, D. L., and Lovejoy, C. (2009). Ecology of the rare microbial biosphere of the Arctic Ocean. *Proceedings of the National Academy of Sciences* 106, 22427–22432. doi: [10.1073/pnas.0908284106](https://doi.org/10.1073/pnas.0908284106).
- Gao, D., and Critser, J. K. (2000). Mechanisms of Cryoinjury in Living Cells. *ILAR Journal* 41, 187–196. doi: [10.1093/ilar.41.4.187](https://doi.org/10.1093/ilar.41.4.187).
- García, L. G., Fernández, M., Azevedo, J. M. N. (2023). MONICET: The Azores whale watching contribution to cetacean monitoring. *Biodiversity Data Journal*, 11, e106991. <https://doi.org/10.3897/BDJ.11.e106991>
- Garcia-Soto, C., and van der Meeren, G. I. (2017). *Advancing Citizen Science for Coastal and Ocean Research*. European Marine Board Available at: <https://imr.brage.unit.no/imr-xmlui/handle/11250/2476796> [Accessed May 24, 2024].
- Gauthier, A. E., Chandler, C. E., Poli, V., Gardner, F. M., Tekiau, A., Smith, R., et al. (2021). Deep-sea microbes as tools to refine the rules of innate immune pattern recognition. *Sci Immunol* 6, eabe0531. doi: [10.1126/sciimmunol.abe0531](https://doi.org/10.1126/sciimmunol.abe0531).
- GBIF (n.d.). Available at: <https://www.gbif.org/> [Accessed June 14, 2024].
- GenBank Overview (n.d.). Available at: <https://www.ncbi.nlm.nih.gov/genbank/> [Accessed January 29, 2024].
- Gilbert, J. A., Jansson, J. K., & Knight, R. (2014). The Earth Microbiome project: Successes and aspirations. *BMC Biology*, 12(1), 69. <https://doi.org/10.1186/s12915-014-0069-1>
- Gilbertson, R., Langan, E., and Mock, T. (2022). Diatoms and Their Microbiomes in Complex and Changing Polar Oceans. *Frontiers in Microbiology* 13. doi: [10.3389/fmicb.2022.786764](https://doi.org/10.3389/fmicb.2022.786764).

- Glaeser, S. P., Silva, L. M. R., Prieto, R., Silva, M. A., Franco, A., Kämpfer, P., et al. (2022). A Preliminary Comparison on Faecal Microbiomes of Free-Ranging Large Baleen (*Balaenoptera musculus*, *B. physalus*, *B. borealis*) and Toothed (*Physeter macrocephalus*) Whales. *Microb Ecol* 83, 18–33. doi: [10.1007/s00248-021-01729-4](https://doi.org/10.1007/s00248-021-01729-4).
- Global Genome Biodiversity Network (GGBN) (n.d.). Available at: [https://www.ggbn.org/ggbn\\_portal/](https://www.ggbn.org/ggbn_portal/) [Accessed November 17, 2023].
- González, Á. F., Rodríguez, H., Outeiriño, L., Vello, C., Larsson, C., and Pascual, S. (2018). A biobanking platform for fish-borne zoonotic parasites: a traceable system to preserve samples, data and money. *Fisheries Research* 202, 29–37. doi: [10.1016/j.fishres.2017.03.014](https://doi.org/10.1016/j.fishres.2017.03.014).
- Goodwin, K. D., Thompson, L. R., Duarte, B., Kahlke, T., Thompson, A. R., Marques, J. C., et al. (2017). DNA Sequencing as a Tool to Monitor Marine Ecological Status. *Frontiers in Marine Science* 4. Available at: <https://www.frontiersin.org/articles/10.3389/fmars.2017.00107> [Accessed May 27, 2024].
- Greenfield, P. (2022, March 30). Biopiracy row at UN talks in Geneva threatens global deal to save nature. *The Guardian*. <https://www.theguardian.com/environment/2022/mar/30/cop15-faces-copenhagen-moment-genetic-data-dispute-aoe> [Accessed February 7 2024]
- Gregory, A. C., Zayed, A. A., Conceição-Neto, N., Temperton, B., Bolduc, B., Alberti, A., Ardyna, M., Arkhipova, K., Carmichael, M., Cruaud, C., Dimier, C., Domínguez-Huerta, G., Ferland, J., Kandels, S., Liu, Y., Marec, C., Pesant, S., Picheral, M., Pisarev, S., ... Sullivan, M. B. (2019). Marine DNA Viral Macro- and Microdiversity from Pole to Pole. *Cell*, 177(5), 1109-1123.e14. <https://doi.org/10.1016/j.cell.2019.03.040>
- Grenié, M., Berti, E., Carvajal-Quintero, J., Dädlow, G. M. L., Sagouis, A., and Winter, M. (2023). Harmonizing taxon names in biodiversity data: A review of tools, databases and best practices. *Methods in Ecology and Evolution* 14, 12–25. doi: [10.1111/2041-210X.13802](https://doi.org/10.1111/2041-210X.13802).
- Hagedorn, M., Parenti, L. R., Craddock, R. A., Comizzoli, P., Mabee, P., Meinke, B., et al. (2024). Safeguarding Earth's biodiversity by creating a lunar biorepository. *BioScience* 74, 561–566. doi: [10.1093/biosci/biae058](https://doi.org/10.1093/biosci/biae058).
- Hagedorn, M., Varga, Z., Walter, R. B., and Tiersch, T. R. (2019). Workshop report: Cryopreservation of aquatic biomedical models. *Cryobiology* 86, 120–129. doi: [10.1016/j.cryobiol.2018.10.264](https://doi.org/10.1016/j.cryobiol.2018.10.264).
- Hahn, M. A., Piecyk, A., Jorge, F., Cerrato, R., Kalbe, M., and Dheilly, N. M. (2022). Host phenotype and microbiome vary with infection status, parasite genotype, and parasite microbiome composition. *Molecular Ecology* 31, 1577–1594. doi: [10.1111/mec.16344](https://doi.org/10.1111/mec.16344).
- Haklay, M., Shanley, L., Berti Suman, A., Schade, S., Riemenschneider, D., Salas Seoane, N., et al. (2020). Supporting Environmental Democracy and the Aarhus Convention. *Association for Advancing Participatory Sciences*. Available at:

<https://participatorysciences.org/2020/10/07/supporting-environmental-democracy-and-the-aarhus-convention/> [Accessed April 29, 2024].

Hanning, I., Diaz-Sanchez, S. (2015). The functionality of the gastrointestinal microbiome in non-human animals. *Microbiome*, 3(1), 51.

<https://doi.org/10.1186/s40168-015-0113-6>

Happywhale (2024). About Happywhale. <https://happywhale.com/about> [Accessed February 1 2024]

Hardisty, A. R., Ellwood, E. R., Nelson, G., Zimkus, B., Buschbom, J., Addink, W., et al. (2022). Digital Extended Specimens: Enabling an Extensible Network of Biodiversity Data Records as Integrated Digital Objects on the Internet. *BioScience* 72, 978–987. doi: [10.1093/biosci/biac060](https://doi.org/10.1093/biosci/biac060).

Harvard Campus Services Environmental Health & Safety (2023). Liquid Nitrogen Dry Shippers. Available at: [https://www.ehs.harvard.edu/sites/default/files/liquid\\_nitrogen\\_dry\\_shippers.pdf](https://www.ehs.harvard.edu/sites/default/files/liquid_nitrogen_dry_shippers.pdf) [Accessed June 5, 2024].

Hauffe, H. C., and Barelli, C. (2019). Conserve the germs: the gut microbiota and adaptive potential. *Conserv Genet* 20, 19–27. doi: [10.1007/s10592-019-01150-y](https://doi.org/10.1007/s10592-019-01150-y).

Heise, J., Nega, M., Alawi, M., and Wagner, D. (2016). Propidium monoazide treatment to distinguish between live and dead methanogens in pure cultures and environmental samples. *Journal of Microbiological Methods* 121, 11–23. doi: [10.1016/j.mimet.2015.12.002](https://doi.org/10.1016/j.mimet.2015.12.002).

Heylen, K., Hoefman, S., Vekeman, B., Peiren, J., and De Vos, P. (2012). Safeguarding bacterial resources promotes biotechnological innovation. *Appl Microbiol Biotechnol* 94, 565–574. doi: [10.1007/s00253-011-3797-y](https://doi.org/10.1007/s00253-011-3797-y).

Hoag, H. (2009). The cold rush. *Nature Biotechnology* 27, 690–692. doi: [10.1038/nbt0809-690](https://doi.org/10.1038/nbt0809-690).

Holub, P., Swertz, M., Reihs, R., van Enkevort, D., Müller, H., and Litton, J.-E. (2016). BBMRI-ERIC Directory: 515 Biobanks with Over 60 Million Biological Samples. *Biopreservation and Biobanking*. doi: [10.1089/bio.2016.0088](https://doi.org/10.1089/bio.2016.0088).

Hornborg, S., Törnqvist, O., Novaglio, C., Selgrath, J., Kågesten, G., Loo, L.-O., et al. (2021). On potential use of historical perspectives in Swedish marine management. Available at: <https://urn.kb.se/resolve?urn=urn:nbn:se:ri:diva-52981> [Accessed May 13, 2024].

Howe, D., Costanzo, M., Fey, P., Gojobori, T., Hannick, L., Hide, W., et al. (2008). The future of biocuration. *Nature* 455, 47–50. doi: [10.1038/455047a](https://doi.org/10.1038/455047a).

Humphries, A. T., Dimarchopoulou, D., Stergiou, K. I., Tsikliras, A. C., Palomares, M.-L. D., Bailly, N., et al. (2023). Measuring the scientific impact of FishBase after three decades. doi: [10.26028/CYBIUM/2023-002](https://doi.org/10.26028/CYBIUM/2023-002).

- Hupman, K., Visser, I., Martinez, E., Stockin, K. (2014). Using platforms of opportunity to determine the occurrence and group characteristics of orca (*Orcinus orca*) in the Hauraki Gulf, New Zealand. *New Zealand Journal of Marine and Freshwater Research*, 49, 132-149  
<https://doi.org/10.1080/00288330.2014.980278>
- Ibáñez, A., Garrido-Chamorro, S., Barreiro, C. (2023). Microorganisms and Climate Change: A Not So Invisible Effect. *Microbiology Research*, 14(3), Article 3. <https://doi.org/10.3390/microbiolres14030064>
- Interact International Network for Terrestrial Research and Monitoring in the Arctic and Association of Polar Early Career Scientists (APECS) (n.d.). Permits and regulations for arctic fieldwork - INTERACT. *INTERACT*. Available at:  
<https://eu-interact.org/accessing-the-arctic/arctic-fieldwork-permits-and-regulations/> [Accessed June 2, 2024].
- IOC/IODE (2024). Ocean Best Practices Systems (OBPS). Available at: <https://www.oceanbestpractices.org/> [Accessed July 13, 2024].
- ISO (n.d.). Online Browsing Platform (OBP). Available at: <https://www.iso.org/obp/ui/en/#home> [Accessed June 1, 2024].
- Isojunno, S., Matthiopoulos, J., Evans, P. G. H. (2012). Harbour porpoise habitat preferences: robust spatio-temporal inferences from opportunistic data. *Marine Ecology Progress Series*, 448, 155-170. <https://doi.org/10.3354/meps09415>
- Jaroszewska, E., Nasiłowska, J., and Sokołowska, B. (2023). Microbial Culture Collections and Microbiological Biobanks in the Context of New ISO Standards. *Advancements of Microbiology* 62, 55–60. doi: [10.2478/am-2023-0005](https://doi.org/10.2478/am-2023-0005).
- Jensen, E. L., Díez-del-Molino, D., Gilbert, M. T. P., Bertola, L. D., Borges, F., Cubric-Curik, V., et al. (2022). Ancient and historical DNA in conservation policy. *Trends in Ecology & Evolution* 37, 420–429. doi: [10.1016/j.tree.2021.12.010](https://doi.org/10.1016/j.tree.2021.12.010).
- Johnson, N., Behe, C., Danielsen, F., Kruümmel, E.-M., Nickels, S., and Pulsifer, P. L. (March 2016). Community-Based Monitoring and Indigenous Knowledge in a Changing Arctic: A Review for the Sustaining Arctic Observing Networks. Final report to Sustaining Arctic Observing Networks. Ottawa, ON: Inuit Circumpolar Council.
- Johnston, A., Matechou, E., and Dennis, E. B. (2023). Outstanding challenges and future directions for biodiversity monitoring using citizen science data. *Methods in Ecology and Evolution* 14, 103–116. doi: [10.1111/2041-210X.13834](https://doi.org/10.1111/2041-210X.13834).
- Joint Cetacean Data Programme Information Hub (n.d.). Available at: <https://jncc.gov.uk/our-work/joint-cetacean-data-programme/> [Accessed June 3, 2024].

- Joo, S., Park, P., and Park, S. (2019). Applicability of propidium monoazide (PMA) for discrimination between living and dead phytoplankton cells. *PLOS ONE* 14, e0218924. doi: [10.1371/journal.pone.0218924](https://doi.org/10.1371/journal.pone.0218924).
- Junge, K., Eicken, H., Swanson, B. D., and Deming, J. W. (2006). Bacterial incorporation of leucine into protein down to  $-20^{\circ}\text{C}$  with evidence for potential activity in sub-eutectic saline ice formations. *Cryobiology* 52, 417–429. doi: [10.1016/j.cryobiol.2006.03.002](https://doi.org/10.1016/j.cryobiol.2006.03.002).
- Karsenti, E., Acinas, S. G., Bork, P., Bowler, C., Vargas, C. D., Raes, J., et al. (2011). A Holistic Approach to Marine Eco-Systems Biology. *PLOS Biology* 9, e1001177. doi: [10.1371/journal.pbio.1001177](https://doi.org/10.1371/journal.pbio.1001177).
- Killer Whale Count - Zooniverse (n.d.). Available at: <https://www.zooniverse.org/projects/alexa-dot-hasselman/killer-whale-count> [Accessed May 19, 2024].
- Klein, E., Appeltans, W., Provoost, P., Saeedi, H., Benson, A., Bajona, L., et al. (2019). OBIS Infrastructure, Lessons Learned, and Vision for the Future. *Frontiers in Marine Science* 6. Available at: <https://www.frontiersin.org/articles/10.3389/fmars.2019.00588> [Accessed May 22, 2024].
- Klotz, L., Fernandez, R., Rasmussen M. H. (2017). Annual and monthly fluctuations in humpback whale (*Megaptera novaeangliae*) presence in Skjálfandi Bay, Iceland, during the feeding season (April–October). *Journal of Cetacean Research and Management*, 16, 9-16.
- Kopf, A., Bicak, M., Kottmann, R., Schnetzer, J., Kostadinov, I., Lehmann, K., et al. (2015). The ocean sampling day consortium. *GigaScience* 4, s13742-015-0066–5. doi: [10.1186/s13742-015-0066-5](https://doi.org/10.1186/s13742-015-0066-5).
- Koschorreck, J. (2015). International Environmental Specimen Bank Group. *Umweltbundesamt*. Available at: <https://www.umweltbundesamt.de/en/topics/chemicals/international-environmental-specimen-bank-group> [Accessed June 23, 2024].
- Knight, R., Vrbanac, A., Taylor, B. C., Aksenov, A., Callewaert, C., Debelius, J., et al. (2018). Best practices for analysing microbiomes. *Nat Rev Microbiol* 16, 410–422. doi: [10.1038/s41579-018-0029-9](https://doi.org/10.1038/s41579-018-0029-9).
- Kraabel, K. D. (2020). Institutional arrangements in a BBNJ treaty: Implications for Arctic marine science. *Marine Policy*, 103807. <https://doi.org/10.1016/j.marpol.2019.103807>
- LaBaer, J., Miceli, J. F., and Freedman, L. P. (2018). What’s in a sample? Increasing transparency in biospecimen procurement methods. *Nat Methods* 15, 303–304. doi: [10.1038/nmeth.4684](https://doi.org/10.1038/nmeth.4684).

- Laiolo, E., Alam, I., Uludag, M., Jamil, T., Agusti, S., Gojobori, T., Acinas, S. G., Gasol, J. M., & Duarte, C. M. (2024). Metagenomic probing toward an atlas of the taxonomic and metabolic foundations of the global ocean genome. *Frontiers in Science*, 1. <https://www.frontiersin.org/journals/science/articles/10.3389/fsci.2023.1038696>
- Laird, S., and Wynberg, R. (2018, February). Fact-finding and scoping study on digital sequence information on genetic resources in the context of the Convention on Biological Diversity and the Nagoya Protocol. In *Montreal: Secretariat of the Convention on Biological Diversity: Ad Hoc Technical Expert Group on Digital Sequence Information on Genetic Resources* (pp. 2-79). Available online at: <https://www.cbd.int/doc/c/b39f/4faf/7668900e8539215e7c7710fe/dsi-ahteg-2018-01-03-en.pdf> (Accessed February 6, 2025)
- Lee, K. M., Adams, M., and Klassen, J. L. (2019). Evaluation of DESS as a storage medium for microbial community analysis. *PeerJ* 7, e6414. doi: 10.7717/peerj.6414.
- Leigh, D. M., van Rees, C. B., Millette, K. L., Breed, M. F., Schmidt, C., Bertola, L. D., et al. (2021). Opportunities and challenges of macrogenetic studies. *Nat Rev Genet* 22, 791–807. doi: [10.1038/s41576-021-00394-0](https://doi.org/10.1038/s41576-021-00394-0).
- Lendemer, J., Thiers, B., Monfils, A. K., Zaspel, J., Ellwood, E. R., Bentley, A., et al. (2020). The Extended Specimen Network: A Strategy to Enhance US Biodiversity Collections, Promote Research and Education. *BioScience* 70, 23–30. doi: [10.1093/biosci/biz140](https://doi.org/10.1093/biosci/biz140).
- Leya, T. (2022). The CCCryo Culture Collection of Cryophilic Algae as a valuable bioresource for algal biodiversity and for novel, industrially marketable metabolites. *Applied Phycology*. Available at: <https://www.tandfonline.com/doi/abs/10.1080/26388081.2020.1753572> [Accessed May 5, 2024].
- Liebenberg, L., Steventon, J., Brahman, !Nate, Benadie, K., Minye, J., Langwane, H. (Karooha), et al. (2017). Smartphone Icon User Interface design for non-literate trackers and its implications for an inclusive citizen science. *Biological Conservation* 208, 155–162. doi: [10.1016/j.biocon.2016.04.033](https://doi.org/10.1016/j.biocon.2016.04.033).
- Lobanov, V., Gobet, A., and Joyce, A. (2022). Ecosystem-specific microbiota and microbiome databases in the era of big data. *Environmental Microbiome* 17, 37. doi: [10.1186/s40793-022-00433-1](https://doi.org/10.1186/s40793-022-00433-1).
- Lofgren, L. A., Stajich, J. E. (2021). Fungal biodiversity and conservation mycology in light of new technology, big data, and changing attitudes. *Current Biology*, 31(19), R1312–R1325. <https://doi.org/10.1016/j.cub.2021.06.083>
- Lo Giudice, A., and Rizzo, C. (2018). Bacteria Associated with Marine Benthic Invertebrates from Polar Environments: Unexplored Frontiers for Biodiscovery? *Diversity* 10, 80. doi: [10.3390/d10030080](https://doi.org/10.3390/d10030080).
- Lotze, H. K., Worm, B. (2009). Historical baselines for large marine animals. *Trends in Ecology & Evolution*, 24(5), 254–262.

- Lydersen, C., Assmy, P., Falk-Petersen, S., Kohler, J., Kovacs, K. M., Reigstad, M., Steen, H., Strøm, H., Sundfjord, A., Varpe, Ø., Walczowski, W., Weslawski, J. M., Zajaczkowski, M. (2014). The importance of tidewater glaciers for marine mammals and seabirds in Svalbard, Norway. *Journal of Marine Systems*, 129, 452–471. <https://doi.org/10.1016/j.jmarsys.2013.09.006>
- Lynch, J. B., and Hsiao, E. Y. (2019). Microbiomes as sources of emergent host phenotypes. *Science* 365, 1405–1409. doi: [10.1126/science.aay0240](https://doi.org/10.1126/science.aay0240).
- Ma, D., Fang, Q., and Guan, S. (2016). Current legal regime for environmental impact assessment in areas beyond national jurisdiction and its future approaches. *Environmental Impact Assessment Review* 56, 23–30. doi: [10.1016/j.eiar.2015.08.009](https://doi.org/10.1016/j.eiar.2015.08.009).
- Mabry, M. E., Zapata, F., Paul, D. L., O'Connor, P. M., Soltis, P. S., Blackburn, D. C., et al. (2022). Monographs as a nexus for building extended specimen networks using persistent identifiers. *Bulletin of the Society of Systematic Biologists* 1. doi: [10.18061/bssb.v1i1.8323](https://doi.org/10.18061/bssb.v1i1.8323).
- Mallory, M. L., Gilchrist, H. G., Janssen, M., Major, H. L., Merkel, F., Provencher, J. F., et al. (2018). Financial costs of conducting science in the Arctic: examples from seabird research. *Arctic Science* 4, 624–633. doi: [10.1139/as-2017-0019](https://doi.org/10.1139/as-2017-0019).
- Mann, J. (1999). Behavioral sampling methods for cetaceans: A review and critique. *Marine Mammals Science*, 15(1), 102-122. <https://doi.org/10.1111/j.1748-7692.1999.tb00784.x>
- Manter, D. K., Delgado, J. A., Blackburn, H. D., Harmel, D., Pérez de León, A. A., and Honeycutt, C. W. (2017). Why we need a National Living Soil Repository. *Proceedings of the National Academy of Sciences* 114, 13587–13590. doi: [10.1073/pnas.1720262115](https://doi.org/10.1073/pnas.1720262115).
- Marden, E., Abbott, R. J., Austerlitz, F., Ortiz-Barrientos, D., Baucom, R. S., Bongaerts, P., et al. (2021). Sharing and reporting benefits from biodiversity research. *Molecular Ecology* 30, 1103–1107. doi: [10.1111/mec.15702](https://doi.org/10.1111/mec.15702).
- Marigomez, I., Lekube, X., 2017. Environmental Specimen Banks: Sample and Data Inventory in Marine Areas of Arctic and Sub-Arctic Regions. <https://ec.europa.eu/research/participants/documents/downloadPublic?documentIds=080166e5b4c5b89d&appId=PPGMS> [Accessed Aug 1, 2024].
- Martínez-Páramo, S., Horváth, Á., Labbé, C., Zhang, T., Robles, V., Herráez, P., et al. (2017). Cryobanking of aquatic species. *Aquaculture* 472, 156–177. doi: [10.1016/j.aquaculture.2016.05.042](https://doi.org/10.1016/j.aquaculture.2016.05.042).
- Martiny, J. B. H., Whiteson, K. L., Bohannan, B. J. M., David, L. A., Hynson, N. A., McFall-Ngai, M., et al. (2020). The emergence of microbiome centres. *Nat Microbiol* 5, 2–3. doi: [10.1038/s41564-019-0644-x](https://doi.org/10.1038/s41564-019-0644-x).



- McBride-Kebert, S., Taylor, J. S., Lyn, H., Moore, F. R., Sacco, D., Kar, B., Kuczaj, S. A. II. (2019). Controlling for Survey Effort Is Worth the Effort: Comparing Bottlenose Dolphin (*Tursiops truncatus*) Habitat Use Between Standardized and Opportunistic Photographic-Identification Surveys. *Aquatic Mammals*, 45(1), 21-29. <https://doi.org/10.1578/AM.45.1.2019.21>
- McCluskey, K. (2017). A Review of Living Collections with Special Emphasis on Sustainability and Its Impact on Research Across Multiple Disciplines. *Biopreservation and Biobanking* 15, 20–30. doi: [10.1089/bio.2016.0066](https://doi.org/10.1089/bio.2016.0066).
- Mecklenburg, C. W., Møller, P. R., and Steinke, D. (2011). Biodiversity of arctic marine fishes: taxonomy and zoogeography. *Mar Biodiv* 41, 109–140. doi: [10.1007/s12526-010-0070-z](https://doi.org/10.1007/s12526-010-0070-z).
- Meineke, E. K., Davies, T. J., Daru, B. H., and Davis, C. C. (2018). Biological collections for understanding biodiversity in the Anthropocene. *Philosophical Transactions of the Royal Society B: Biological Sciences* 374, 20170386. doi: [10.1098/rstb.2017.0386](https://doi.org/10.1098/rstb.2017.0386).
- Menke, S., Gillingham, M. A. F., Wilhelm, K., and Sommer, S. (2017). Home-Made Cost Effective Preservation Buffer Is a Better Alternative to Commercial Preservation Methods for Microbiome Research. *Frontiers in Microbiology* 8. doi: [10.3389/fmicb.2017.00102](https://doi.org/10.3389/fmicb.2017.00102).
- Meyer, R., Appeltans, W., Duncan, W., Dimitrova, M., Gan, Y.-M., Jeppesen, T. S., et al. (2023). Aligning Standards Communities for Omics Biodiversity Data: Sustainable Darwin Core-MIxS Interoperability. *Biodiversity Data Journal* 11, e112420. doi: [10.3897/BDJ.11.e112420](https://doi.org/10.3897/BDJ.11.e112420).
- MICROBE (2023). Available at: <https://www.microbeproject.eu/> [Accessed June 19, 2024].
- Mock, T., Boulton, W., Balmonte, J.-P., Barry, K., Bertilsson, S., Bowman, J., et al. (2022). Multiomics in the central Arctic Ocean for benchmarking biodiversity change. *PLOS Biology* 20, e3001835. doi: [10.1371/journal.pbio.3001835](https://doi.org/10.1371/journal.pbio.3001835).
- Mooney, A., Ryder, O. A., Houck, M. L., Staerk, J., Conde, D. A., and Buckley, Y. M. (2023). Maximizing the potential for living cell banks to contribute to global conservation priorities. *Zoo Biology* 42, 697–708. doi: [10.1002/zoo.21787](https://doi.org/10.1002/zoo.21787).
- Morganti, T. M., Slaby, B. M., de Kluijver, A., Busch, K., Hentschel, U., Middelburg, J. J., et al. (2022). Giant sponge grounds of Central Arctic seamounts are associated with extinct seep life. *Nat Commun* 13, 638. doi: [10.1038/s41467-022-28129-7](https://doi.org/10.1038/s41467-022-28129-7).
- Morneau, D. (2021). Pan-genomes: moving beyond the reference. *Nature Research*. doi: 10.1038/d42859-020-00115-3.
- Moss, A., Vukelic, M., Walker, S. L., Smith, C., and Spooner, S. L. (2023). The Role of Zoos and Aquariums in Contributing to the Kunming–Montreal Global



- Biodiversity Framework. *Journal of Zoological and Botanical Gardens* 4, 445–461. doi: [10.3390/jzbg4020033](https://doi.org/10.3390/jzbg4020033).
- Moudrý, V., and Devillers, R. (2020). Quality and usability challenges of global marine biodiversity databases: An example for marine mammal data. *Ecological Informatics* 56, 101051. doi: [10.1016/j.ecoinf.2020.101051](https://doi.org/10.1016/j.ecoinf.2020.101051).
- Müller, J., Day, J. G., Harding, K., Hepperle, D., Lorenz, M., and Friedl, T. (2007). Assessing Genetic Stability of a Range of Terrestrial Microalgae after Cryopreservation Using Amplified Fragment Length Polymorphism (AFLP). *American Journal of Botany* 94, 799–808. doi: [10.3732/ajb.94.5.799](https://doi.org/10.3732/ajb.94.5.799).
- Nagler, M., Insam, H., Pietramellara, G., and Ascher-Jenull, J. (2018). Extracellular DNA in natural environments: features, relevance and applications. *Appl Microbiol Biotechnol* 102, 6343–6356. doi: [10.1007/s00253-018-9120-4](https://doi.org/10.1007/s00253-018-9120-4).
- Nakanishi, K., Deuchi, K., and Kuwano, K. (2012). Cryopreservation of four valuable strains of microalgae, including viability and characteristics during 15 years of cryostorage. *J Appl Phycol* 24, 1381–1385. doi: [10.1007/s10811-012-9790-8](https://doi.org/10.1007/s10811-012-9790-8).
- NAMMCO. (2019). Sightings Surveys in the North Atlantic: 30 years of counting whales. NAMMCO Scientific Publications, 11. doi: [10.7557/3.11](https://doi.org/10.7557/3.11)
- Nata'ala, M. K., Avila Santos, A. P., Coelho Kasmanas, J., Bartholomäus, A., Saraiva, J. P., Godinho Silva, S., et al. (2022). MarineMetagenomeDB: a public repository for curated and standardized metadata for marine metagenomes. *Environmental Microbiome* 17, 57. doi: [10.1186/s40793-022-00449-7](https://doi.org/10.1186/s40793-022-00449-7).
- Nature's SAFE (2020). Nature Charity | Nature's SAFE | England. *Nature's SAFE*. Available at: <https://www.natures-safe.com> [Accessed August 2, 2024].
- NCBI (n.d.). RefSeq: NCBI Reference Sequence Database. Available at: <https://www.ncbi.nlm.nih.gov/refseq/> [Accessed June 9, 2024].
- NCIP/common-biorepository-model (2023). Available at: <https://github.com/NCIP/common-biorepository-model> [Accessed June 13, 2024].
- NCMA (n.d.). NCMA at Bigelow Laboratory. Available at: <https://ncma.bigelow.org/> [Accessed June 9, 2024].
- Nissimov, J. I., Campbell, C. N., Probert, I., and Wilson, W. H. (2022). Aquatic virus culture collection: an absent (but necessary) safety net for environmental microbiologists. *Applied Phycology* 3, 211–225. doi: [10.1080/26388081.2020.1770123](https://doi.org/10.1080/26388081.2020.1770123).
- O'Brien, K. M., Crockett, E. L., Adams, B. J., Amsler, C. D., Appiah-Madson, H. J., Collins, A., et al. (2022). The time is right for an Antarctic biorepository network. *Proceedings of the National Academy of Sciences* 119, e2212800119. doi: [10.1073/pnas.2212800119](https://doi.org/10.1073/pnas.2212800119).
- Ocean Census (n.d.). Expeditions. *Ocean Census*. Available at: <https://oceanconsensus.org/expeditions/> [Accessed July 14, 2024].

- Ocean Sampling Day | Assemble+ (n.d.). Available at: <https://www.assembleplus.eu/research/ocean-sampling-day> [Accessed September 26, 2022].
- Ojaveer, H., Galil, B. S., Carlton, J. T., Alleway, H., Gouletquer, P., Lehtiniemi, M., et al. (2018). Historical baselines in marine bioinvasions: Implications for policy and management. *PLOS ONE* 13, e0202383. doi: [10.1371/journal.pone.0202383](https://doi.org/10.1371/journal.pone.0202383).
- Okada, A., Tsuchida, M., Rahman, Md. M., and Inoshima, Y. (2022). Two-Round Treatment With Propidium Monoazide Completely Inhibits the Detection of Dead *Campylobacter* spp. Cells by Quantitative PCR. *Frontiers in Microbiology* 13. Available at: <https://www.frontiersin.org/journals/microbiology/articles/10.3389/fmicb.2022.801961> [Accessed September 17, 2024].
- Oliveira-Rodrigues, C., Correia, A. M., Valente, R., Gil, A., Gandra, M., Rosso, M., Pierce, G., Sousa-Pinto, I. (2022). Assessing data bias in visual surveys from a cetacean monitoring programme. *Scientific Data*, 9, 682. <https://doi.org/10.1038/s41597-022-01803-7>
- Osman, E. O., Weinnig, A. M. (2022). Microbiomes and Obligate Symbiosis of Deep-Sea Animals. *Annual Review of Animal Biosciences*, 10(1), 151–176. <https://doi.org/10.1146/annurev-animal-081621-112021>
- Pangeo — Pangeo documentation (n.d.). Available at: <https://pangeo.io/> [Accessed July 15, 2024].
- Patin, N. V., and Goodwin, K. D. (2023). Capturing marine microbiomes and environmental DNA: A field sampling guide. *Frontiers in Microbiology* 13. Available at: <https://www.frontiersin.org/journals/microbiology/articles/10.3389/fmicb.2022.1026596> [Accessed May 23, 2024].
- Pedersen, C., Otokiak, M., Koonoo, I., Milton, J., Maktar, E., Anaviapik, A., et al. (2020). SciQ: an invitation and recommendations to combine science and Inuit Qaujimagatuqangit for meaningful engagement of Inuit communities in research. *Arctic Science* 6, 326–339. doi: [10.1139/as-2020-0015](https://doi.org/10.1139/as-2020-0015).
- Peixoto, R. S., Voolstra, C. R., Sweet, M., Duarte, C. M., Carvalho, S., Villela, H., et al. (2022). Harnessing the microbiome to prevent global biodiversity loss. *Nat Microbiol* 7, 1726–1735. doi: [10.1038/s41564-022-01173-1](https://doi.org/10.1038/s41564-022-01173-1).
- Pérez-Espona, S. (2021). Conservation-focused biobanks: A valuable resource for wildlife DNA forensics. *Forensic Science International: Animals and Environments* 1, 100017. doi: [10.1016/j.fsiae.2021.100017](https://doi.org/10.1016/j.fsiae.2021.100017).
- Platforms for hosting participatory science projects (n.d.). *Association for Advancing Participatory Sciences*. Available at: <https://participatorysciences.org/resources/platforms-for-hosting-participatory-science-projects/> [Accessed June 16, 2024].
- Poo, S., Whitfield, S. M., Shepack, A., Watkins-Colwell, G. J., Nelson, G., Goodwin, J., et al. (2022). Bridging the Research Gap between Live Collections in

Zoos and Preserved Collections in Natural History Museums. *BioScience* 72, 449–460. doi: [10.1093/biosci/biac022](https://doi.org/10.1093/biosci/biac022).

Pooter, D. D., Appeltans, W., Bailly, N., Bristol, S., Deneudt, K., Eliezer, M., et al. (2017). Toward a new data standard for combined marine biological and environmental datasets - expanding OBIS beyond species occurrences. *Biodiversity Data Journal* 5, e10989. doi: [10.3897/BDJ.5.e10989](https://doi.org/10.3897/BDJ.5.e10989).

Post, S., Werner, K. M., Núñez-Riboni, I., Chafik, L., Hátún, H., Jansen, T. (2021). Subpolar gyre and temperature drive boreal fish abundance in Greenland waters. *Fish and Fisheries*, 22(1), 161–174. <https://doi.org/10.1111/faf.12512>

PPSR Core | PPSR Core (n.d.). Available at: <https://core.citizen-science.org/> [Accessed June 16, 2024].

Prakash, O., Nimonkar, Y., and Desai, D. (2020). A Recent Overview of Microbes and Microbiome Preservation. *Indian J Microbiol* 60, 297–309. doi: [10.1007/s12088-020-00880-9](https://doi.org/10.1007/s12088-020-00880-9).

Prakash, O., Nimonkar, Y., and Shouche, Y. S. (2013). Practice and prospects of microbial preservation. *FEMS Microbiology Letters* 339, 1–9. doi: [10.1111/1574-6968.12034](https://doi.org/10.1111/1574-6968.12034).

Pruitt, K. D., Tatusova, T., and Maglott, D. R. (2005). NCBI Reference Sequence (RefSeq): a curated non-redundant sequence database of genomes, transcripts and proteins. *Nucleic Acids Research* 33, D501–D504. doi: [10.1093/nar/gki025](https://doi.org/10.1093/nar/gki025).

Pyle, P. (2007). Standardizing At-sea Monitoring Programs for Marine Birds, Mammals, Other Organisms, Debris, and Vessels, including Recommendations for West-Coast National Marine Sanctuaries. 28pp. [https://sanctuarysimon.org/regional\\_docs/monitoring\\_projects/84\\_doc3.pdf](https://sanctuarysimon.org/regional_docs/monitoring_projects/84_doc3.pdf)

Qi, X., Li, Z., Zhao, C., Zhang, Q., Zhou, Y. (2024). Environmental impacts of Arctic shipping activities: A review. *Ocean & Coastal Management*, 247, 106936. <https://doi.org/10.1016/j.ocecoaman.2023.106936>

Rain-Franco, A., de Moraes, G. P., & Beier, S. (2021). Cryopreservation and Resuscitation of Natural Aquatic Prokaryotic Communities. *Frontiers in Microbiology*, 11. <https://doi.org/10.3389/fmicb.2020.597653>

Rantanen, M., Karpechko, A. Y., Lipponen, A., Nordling, K., Hyvärinen, O., Ruosteenoja, K., et al. (2022). The Arctic has warmed nearly four times faster than the globe since 1979. *Commun Earth Environ* 3, 1–10. doi: [10.1038/s43247-022-00498-3](https://doi.org/10.1038/s43247-022-00498-3).

Risely, A. (2020). Applying the core microbiome to understand host–microbe systems. *Journal of Animal Ecology* 89, 1549–1558. doi: [10.1111/1365-2656.13229](https://doi.org/10.1111/1365-2656.13229).

- Robbins, J. and Frost M. (2009). An on-line database for world-wide tracking of commercial whale watching and associated data collection programs. Paper SC/61/WW7 presented to the Scientific Committee of the International Whaling Commission. Retrieved June 4, 2011, from [http://iwcoffice.co.uk/documents/sci\\_com/SC61docs/SC-61-WW7.pdf](http://iwcoffice.co.uk/documents/sci_com/SC61docs/SC-61-WW7.pdf) (Accessed January 28, 2024)
- Robert, V., Vu, D., Amor, A. B. H., van de Wiele, N., Brouwer, C., Jabas, B., et al. (2013). MycoBank gearing up for new horizons. *IMA Fungus* 4, 371–379. doi: [10.5598/imafungus.2013.04.02.16](https://doi.org/10.5598/imafungus.2013.04.02.16).
- Rölfer, L., Liconti, A., Prinz, N., & Klöcker, C. A. (2021). Integrated Research for Integrated Ocean Management. *Frontiers in Marine Science*, 8. <https://doi.org/10.3389/fmars.2021.693373>
- Romano, P., Dawyndt, P., Piersigilli, F., and Swings, J. (2005a). Improving interoperability between microbial information and sequence databases. *BMC Bioinformatics* 6, S23. doi: [10.1186/1471-2105-6-S4-S23](https://doi.org/10.1186/1471-2105-6-S4-S23).
- Romano, P., Kracht, M., Manniello, M. A., Stegehuis, G., and Fritze, D. (2005b). The Role of Informatics in the Coordinated Management of Biological Resources Collections. *Appl-Bioinformatics* 4, 175–186. doi: [10.2165/00822942-200594030-00002](https://doi.org/10.2165/00822942-200594030-00002).
- Rosendal, G. K., Myhr, A. I., & Tvedt, M. W. (2016). Access and Benefit Sharing Legislation for Marine Bioprospecting: Lessons From Australia for the Role of Marbank in Norway. *The Journal of World Intellectual Property*, 19(3–4), 86–98. <https://doi.org/10.1111/jwip.12058>
- Rotter, A., Barbier, M., Bertoni, F., Bones, A. M., Cancela, M. L., Carlsson, J., Carvalho, M. F., Cegłowska, M., Chirivella-Martorell, J., Conk Dalay, M., Cueto, M., Dailianis, T., Deniz, I., Díaz-Marrero, A. R., Drakulovic, D., Dubnika, A., Edwards, C., Einarsson, H., Erdoğan, A., ... Vasquez, M. I. (2021). The Essentials of Marine Biotechnology. *Frontiers in Marine Science*, 8. <https://www.frontiersin.org/articles/10.3389/fmars.2021.629629>
- RRID Initiative | Current Project (n.d.). *Research Resource Identifier*. Available at: <https://www.rrids.org/current-project> [Accessed June 4, 2024].
- Rüdel, D. H., and Weingärtner, M. (2008). Storage of Environmental Samples under Cryogenic Conditions.
- Rüdel, H., Weingärtner, M., Klein, R., and Deutsch, A. (2015). Guidelines for Sampling and Sample Processing: Transporting Environmental Samples under Cryogenic Conditions.
- Rusch, D. B., Halpern, A. L., Sutton, G., Heidelberg, K. B., Williamson, S., Yooseph, S., et al. (2007). The Sorcerer II Global Ocean Sampling Expedition: Northwest Atlantic through Eastern Tropical Pacific. *PLOS Biology* 5, e77. doi: [10.1371/journal.pbio.0050077](https://doi.org/10.1371/journal.pbio.0050077).
- Ryan, M. J., Mauchline, T. H., Malone, J. G., Jones, S., Thompson, C. M. A., Bonnin, J. M., Stewart, H., Yau, P. T. O., Taketani, R. G., Clark, I. M., & Holden, N.

(2023). The UK Crop Microbiome Cryobank: A utility and model for supporting Phytobiomes research. *CABI Agriculture and Bioscience*, 4(1), 53. <https://doi.org/10.1186/s43170-023-00190-2>

Ryan, M. J., Schloter, M., Berg, G., Kinkel, L. L., Eversole, K., Macklin, J. A., et al. (2021a). Towards a unified data infrastructure to support European and global microbiome research: a call to action. *Environmental Microbiology* 23, 372–375. doi: [10.1111/1462-2920.15323](https://doi.org/10.1111/1462-2920.15323).

Ryan, M. J., Schloter, M., Berg, G., Kostic, T., Kinkel, L. L., Eversole, K., et al. (2021b). Development of Microbiome Biobanks – Challenges and Opportunities. *Trends in Microbiology* 29, 89–92. doi: [10.1016/j.tim.2020.06.009](https://doi.org/10.1016/j.tim.2020.06.009).

Samuel, R. M., Meyer, R., Buttigieg, P. L., Davies, N., Jeffery, N. W., Meyer, C., et al. (2021). Toward a Global Public Repository of Community Protocols to Encourage Best Practices in Biomolecular Ocean Observing and Research. *Frontiers in Marine Science* 8. Available at: <https://www.frontiersin.org/articles/10.3389/fmars.2021.758694> [Accessed May 22, 2024].

Sánchez, P., Coutinho, F. H., Sebastián, M., Pernice, M. C., Rodríguez-Martínez, R., Salazar, G., et al. (2024). Marine picoplankton metagenomes and MAGs from eleven vertical profiles obtained by the Malaspina Expedition. *Sci Data* 11, 154. doi: [10.1038/s41597-024-02974-1](https://doi.org/10.1038/s41597-024-02974-1).

Sanders, J. G., Beichman, A. C., Roman, J., Scott, J. J., Emerson, D., McCarthy, J. J., et al. (2015). Baleen whales host a unique gut microbiome with similarities to both carnivores and herbivores. *Nat Commun* 6, 8285. doi: [10.1038/ncomms9285](https://doi.org/10.1038/ncomms9285).

San Diego Zoo Wildlife Alliance (2024). Frozen Zoo®. Available at: <https://science.sandiegozoo.org/resources/frozen-zoo%C2%AE> [Accessed July 5, 2024].

Sayigh, L., Quick, N., Hastie, G., and Tyack, P. (2013). Repeated call types in short-finned pilot whales, *Globicephala macrorhynchus*. *Marine Mammal Science* 29, 312–324. doi: [10.1111/j.1748-7692.2012.00577.x](https://doi.org/10.1111/j.1748-7692.2012.00577.x)

SCAR Antarctic Biodiversity Portal (n.d.). Available at: <https://www.biodiversity.aq/> [Accessed July 30, 2024].

Schindel, D. E., Cook, J. A. (2018). The next generation of natural history collections. *PLOS Biology*, 16(7), e2006125. doi: [10.1371/journal.pbio.2006125](https://doi.org/10.1371/journal.pbio.2006125)

Schmidt, T. S. B., Fullam, A., Ferretti, P., Orakov, A., Maistrenko, O. M., Ruscheweyh, H.-J., Letunic, I., Duan, Y., Van Rossum, T., Sunagawa, S., Mende, D. R., Finn, R. D., Kuhn, M., Pedro Coelho, L., & Bork, P. (2024). SPIRE: A Searchable, Planetary-scale microbiome REsource. *Nucleic Acids Research*, 52(D1), D777–D783. <https://doi.org/10.1093/nar/gkad943>

Schmidt Ocean Institute (n.d.). *Cruises*. Available at: <https://schmidtocean.org/cruises/> [Accessed May 24, 2024].

- Schüngel, M., and Stackebrandt, E. (2015). Microbial Resource Research Infrastructure (MIRRI): Infrastructure to foster academic research and biotechnological innovation. *Biotechnology Journal* 10, 17–19. doi: [10.1002/biot.201400481](https://doi.org/10.1002/biot.201400481).
- Schuurman, N., and Leszczynski, A. (2008). Ontologies for Bioinformatics. *Bioinform Biol Insights* 2, BBI.S451. doi: [10.4137/BBI.S451](https://doi.org/10.4137/BBI.S451).
- SciScore: The best methods review tool for scientific research (n.d.). Available at: <https://sciscore.com/> [Accessed June 4, 2024].
- Segal-Kischinevzky, C., Romero-Aguilar, L., Alcaraz, L. D., López-Ortiz, G., Martínez-Castillo, B., Torres-Ramírez, N., Sandoval, G., González, J. (2022). Yeasts Inhabiting Extreme Environments and Their Biotechnological Applications. *Microorganisms*, 10(4), Article 4. <https://doi.org/10.3390/microorganisms10040794>
- Sehna, L., Brammer-Robbins, E., Wormington, A. M., Blaha, L., Bisesi, J., Larkin, I., Martyniuk, C. J., Simonin, M., Adamovsky, O. (2021). Microbiome Composition and Function in Aquatic Vertebrates: Small Organisms Making Big Impacts on Aquatic Animal Health. *Frontiers in Microbiology*, 12. doi: [10.3389/fmicb.2021.567408](https://doi.org/10.3389/fmicb.2021.567408)
- Sigovini, M., Keppel, E., and Tagliapietra, D. (2016). Open Nomenclature in the biodiversity era. *Methods Ecol Evol* 7, 1217–1225. doi: [10.1111/2041-210X.12594](https://doi.org/10.1111/2041-210X.12594).
- Smaldino, P. E., and McElreath, R. (2016). The natural selection of bad science. *Royal Society Open Science* 3, 160384. doi: [10.1098/rsos.160384](https://doi.org/10.1098/rsos.160384).
- Smith, D., Kermode, A., Cafà, G., Buddie, A. G., Caine, T. S., and Ryan, M. J. (2020). Strengthening mycology research through coordinated access to microbial culture collection strains. *CABI Agriculture and Bioscience* 1, 2. doi: [10.1186/s43170-020-00004-9](https://doi.org/10.1186/s43170-020-00004-9).
- Smith, D., McCluskey, K., and Stackebrandt, E. (2014). Investment into the future of microbial resources: culture collection funding models and BRC business plans for biological resource centres. *SpringerPlus* 3, 81. doi: [10.1186/2193-1801-3-81](https://doi.org/10.1186/2193-1801-3-81).
- Snapes, E., Astrin, J.J., Bertheussen Krüger, N., Grossman, G.H., Hendrickson, E., Miller, N., and Seiler, C. eds. (2023). *Updating International Society for Biological and Environmental Repositories Best Practices, Fifth Edition: A New Process for Relevance in an Evolving Landscape*. Biopreservation and Biobanking. Dec 2023.537546. doi: [10.1089/bio.2023.0140](https://doi.org/10.1089/bio.2023.0140) Available at: <https://www.isber.org/page/BPR> [Accessed December 15, 2023].
- Song, S. J., Amir, A., Metcalf, J. L., Amato, K. R., Xu, Z. Z., Humphrey, G., et al. (2016). Preservation Methods Differ in Fecal Microbiome Stability, Affecting Suitability for Field Studies. *mSystems*. doi: [10.1128/mSystems.00021-16](https://doi.org/10.1128/mSystems.00021-16).
- Springer Nature (2024). Bring structure to your research. *protocols.io*. Available at: <https://www.protocols.io> [Accessed August 3, 2024].

- Stark, P. B. (2018). Before reproducibility must come preproducibility. *Nature*, 557(7707), 613–613. <https://doi.org/10.1038/d41586-018-05256-0>
- Stefanni, S., Mirimin, L., Stanković, D., Chatzievangelou, D., Bongiorno, L., Marini, S., et al. (2022). Framing Cutting-Edge Integrative Deep-Sea Biodiversity Monitoring via Environmental DNA and Optoacoustic Augmented Infrastructures. *Front. Mar. Sci.* 8, 797140. doi: [10.3389/fmars.2021.797140](https://doi.org/10.3389/fmars.2021.797140).
- Steiger, D., Heuss, A. (2020). Microbiota vault – feasibility study. Available at: [https://www.microbiotavault.org/wp-content/uploads/2021/03/Microbiota\\_Vault\\_Report\\_Final\\_20200611.pdf](https://www.microbiotavault.org/wp-content/uploads/2021/03/Microbiota_Vault_Report_Final_20200611.pdf) [Accessed June 29, 2024].
- Stephenson, P. J. (2021). A Review Of Biodiversity Data Needs And Monitoring Protocols for the Offshore Wind Energy Sector in the Baltic Sea and North Sea (Berlin, Germany: Report for the Renewables Grid Initiative). Available at: [https://renewables-grid.eu/fileadmin/user\\_upload/\\_RGI\\_Report\\_PJ-Stephenson\\_October.pdf](https://renewables-grid.eu/fileadmin/user_upload/_RGI_Report_PJ-Stephenson_October.pdf) [Accessed January 27, 2025]
- Sterner, B. W., Gilbert, E. E., and Franz, N. M. (2020). Decentralized but Globally Coordinated Biodiversity Data. *Frontiers in Big Data* 3. Available at: <https://www.frontiersin.org/articles/10.3389/fdata.2020.519133> [Accessed June 14, 2024].
- Sunagawa, S., Acinas, S. G., Bork, P., Bowler, C., Eveillard, D., Gorsky, G., et al. (2020). Tara Oceans: towards global ocean ecosystems biology. *Nat Rev Microbiol* 18, 428–445. doi: [10.1038/s41579-020-0364-5](https://doi.org/10.1038/s41579-020-0364-5).
- Sweeney, K., Birkemeier, B., Fritz, L., Gelatt, T., Burkanov, V., and Altukhov, A. (n.d.). Steller Watch - Zooniverse. *Steller Watch*. Available at: <https://www.zooniverse.org/projects/sweenkl/steller-watch/about/results> [Accessed September 5, 2024].
- Suttle, C. A. (2007). Marine viruses—Major players in the global ecosystem. *Nature Reviews Microbiology*, 5(10), Article 10. <https://doi.org/10.1038/nrmicro1750>
- ten Hoopen, P., Pesant, S., Kottmann, R., Kopf, A., Bicak, M., Claus, S., et al. (2015). Marine microbial biodiversity, bioinformatics and biotechnology (M2B3) data reporting and service standards. *Standards in Genomic Sciences* 10, 20. doi: [10.1186/s40793-015-0001-5](https://doi.org/10.1186/s40793-015-0001-5).
- Tennant, R. K., Power, A. L., Burton, S. K., Sinclair, N., Parker, D. A., Jones, R. T., et al. (2022). In-situ sequencing reveals the effect of storage on lacustrine sediment microbiome demographics and functionality. *Environmental Microbiome* 17, 5. doi: [10.1186/s40793-022-00400-w](https://doi.org/10.1186/s40793-022-00400-w).
- Tessnow-von Wysocki, I., and Vadrot, A. B. M. (2020). The Voice of Science on Marine Biodiversity Negotiations: A Systematic Literature Review. *Frontiers in Marine Science* 7. Available at: <https://www.frontiersin.org/journals/marine-science/articles/10.3389/fmars.2020.614282> [Accessed July 5, 2024].



- The Arctic University of Norway (n.d.). Marine Metagenomics Portal. *Marine Metagenomics Portal*. Available at: <https://mmp2.sfb.uit.no/> [Accessed June 13, 2024].
- Thompson, L. R., Sanders, J. G., McDonald, D., Amir, A., Ladau, J., Locey, K. J., Prill, R. J., Tripathi, A., Gibbons, S. M., Ackermann, G., Navas-Molina, J. A., Janssen, S., Kopylova, E., Vázquez-Baeza, Y., González, A., Morton, J. T., Mirarab, S., Zech Xu, Z., Jiang, L., ... Knight, R. (2017). A communal catalogue reveals Earth's multiscale microbial diversity. *Nature* 551, 457–463. doi: [10.1038/nature24621](https://doi.org/10.1038/nature24621)
- Thornton, T. F., and Scheer, A. M. (2012). Collaborative engagement of local and traditional knowledge and science in marine environments: A Review. *Ecology and Society* 17 (3). Available at: <https://www.jstor.org/stable/26269064> [Accessed January 14, 2024].
- Thukral, M., Allen, A. E., and Petras, D. (2023). Progress and challenges in exploring aquatic microbial communities using non-targeted metabolomics. *ISME J* 17, 2147–2159. doi: [10.1038/s41396-023-01532-8](https://doi.org/10.1038/s41396-023-01532-8).
- Timmis, K., de Vos, W. M., Ramos, J. L., Vlaeminck, S. E., Prieto, A., Danchin, A., et al. (2017). The contribution of microbial biotechnology to sustainable development goals. *Microbial Biotechnology* 10, 984–987. doi: [10.1111/1751-7915.12818](https://doi.org/10.1111/1751-7915.12818).
- University of Genoa (n.d.). Antarctic Environmental Specimen Bank | BCAA. *Antarctic Environmental Specimen Bank*. Available at: <https://bcaa.unige.it/en> [Accessed June 16, 2024].
- Vachon, F., Hersh, T. A., Rendell, L., Gero, S., and Whitehead, H. (2022). Ocean nomads or island specialists? Culturally driven habitat partitioning contrasts in scale between geographically isolated sperm whale populations. *Royal Society Open Science* 9, 211737. doi: [10.1098/rsos.211737](https://doi.org/10.1098/rsos.211737).
- Valsecchi, E., Arcangeli, A., Lombardi, R., Boyse, E., Carr, I. M., Galli, P., Goodman, S. J. (2021). Ferries and Environmental DNA: Underway Sampling From Commercial Vessels Provides New Opportunities for Systematic Genetic Surveys of Marine Biodiversity. *Frontiers in Marine Science*, 8, 704786. <https://doi.org/10.3389/fmars.2021.704786>
- Vangay, P., Burgin, J., Johnston, A., Beck, K. L., Berrios, D. C., Blumberg, K., et al. (2021). Microbiome Metadata Standards: Report of the National Microbiome Data Collaborative's Workshop and Follow-On Activities. *mSystems* 6, 10.1128/msystems.01194-20. doi: [10.1128/msystems.01194-20](https://doi.org/10.1128/msystems.01194-20).
- van Weelden, C., Towers, J. R., and Bosker, T. (2021). Impacts of climate change on cetacean distribution, habitat and migration. *Climate Change Ecology* 1, 100009. doi: [10.1016/j.ecochg.2021.100009](https://doi.org/10.1016/j.ecochg.2021.100009).
- Vekeman, B., and Heylen, K. (2015). "Preservation of microbial pure cultures and mixed communities," in *Hydrocarbon and Lipid Microbiology Protocols: Isolation and Cultivation* Springer Protocols Handbooks., eds. T. J. McGenity, K. N. Timmis, and B. Nogales (Springer, Berlin, Heidelberg), 299–315.



doi: [10.1007/8623\\_2015\\_51](https://doi.org/10.1007/8623_2015_51).

Verwega, M.-T., Trahms, C., Antia, A. N., Dickhaus, T., Prigge, E., Prinzler, M. H. U., Renz, M., Schartau, M., Slawig, T., Somes, C. J., Biastoch, A. (2021). Perspectives on Marine Data Science as a Blueprint for Emerging Data Science Disciplines. *Frontiers in Marine Science*, 8.

<https://doi.org/10.3389/fmars.2021.678404>

Vinding, K., Bester, M., Kirkman, S. P., Chivell, W., Elwen, S. H. (2015). The Use of Data from a Platform of Opportunity (Whale Watching) to Study Coastal Cetaceans On the Southwest Coast of South Africa. *Tourism in Marine Environments*, 11(1), 33–54.

<https://dx.doi.org/10.3727/154427315x14398263718439>

Wang, Y., Yan, Y., Thompson, K. N., Bae, S., Accorsi, E. K., Zhang, Y., et al. (2021). Whole microbial community viability is not quantitatively reflected by propidium monoazide sequencing approach. *Microbiome* 9, 17. doi: [10.1186/s40168-020-00961-3](https://doi.org/10.1186/s40168-020-00961-3).

WDCM (n.d.). World Data Centre for Microorganisms. Available at: <https://www.wdcm.org/> [Accessed May 10, 2022].

Weinbauer, M. G., and Rassoulzadegan, F. (2007). Extinction of microbes: evidence and potential consequences. *Endangered Species Research* 3, 205–215. doi: [10.3354/esr003205](https://doi.org/10.3354/esr003205).

West, A. G., Waite, D. W., Deines, P., Bourne, D. G., Digby, A., McKenzie, V. J., et al. (2019). The microbiome in threatened species conservation. *Biological Conservation* 229, 85–98. doi: [10.1016/j.biocon.2018.11.016](https://doi.org/10.1016/j.biocon.2018.11.016).

Wietz, M., Bienhold, C., Metfies, K., Torres-Valdés, S., von Appen, W.-J., Salter, I., et al. (2021). The polar night shift: seasonal dynamics and drivers of Arctic Ocean microbiomes revealed by autonomous sampling. *ISME COMMUN.* 1, 1–12. doi: [10.1038/s43705-021-00074-4](https://doi.org/10.1038/s43705-021-00074-4).

WildMe. (2024). About Flukebook. <https://www.flukebook.org/overview.jsp> [Accessed February 1 2024]

Wilkins, L. G. E., Leray, M., O’Dea, A., Yuen, B., Peixoto, R. S., Pereira, T. J., et al. (2019). Host-associated microbiomes drive structure and function of marine ecosystems. *PLOS Biology* 17, e3000533. doi: [10.1371/journal.pbio.3000533](https://doi.org/10.1371/journal.pbio.3000533).

WIPO (2024). Guide to the Deposit of Microorganisms under the Budapest Treaty. Available at: <https://www.wipo.int/budapest/en/guide/> [Accessed May 30, 2024].

Wolf, K. K. E., Romanelli, E., Rost, B., John, U., Collins, S., Weigand, H., et al. (2019). Company matters: The presence of other genotypes alters traits and intraspecific selection in an Arctic diatom under climate change. *Global Change Biology* 25, 2869–2884. doi: [10.1111/gcb.14675](https://doi.org/10.1111/gcb.14675).

- WoRMS (n.d.). WoRMS - World Register of Marine Species. Available at: <https://www.marinespecies.org/about.php> [Accessed June 8, 2024].
- Wu, L., Sun, Q., Desmeth, P., Sugawara, H., Xu, Z., McCluskey, K., Smith, D., Alexander, V., Lima, N., Ohkuma, M., Robert, V., Zhou, Y., Li, J., Fan, G., Ingsriswang, S., Ozerskaya, S., & Ma, J. (2017). World data centre for microorganisms: An information infrastructure to explore and utilize preserved microbial strains worldwide. *Nucleic Acids Research*, 45(D1), D611–D618. <https://doi.org/10.1093/nar/gkw903>
- Yeates, D. K., Zwick, A., Mikheyev, A. S. (2016). Museums are biobanks: Unlocking the genetic potential of the three billion specimens in the world's biological collections. *Current Opinion in Insect Science*, 18, 83–88. <https://doi.org/10.1016/j.cois.2016.09.009>
- Yilmaz, P., Kottmann, R., Field, D., Knight, R., Cole, J. R., Amaral-Zettler, L., et al. (2011). Minimum information about a marker gene sequence (MIMARKS) and minimum information about any (x) sequence (MIxS) specifications. *Nat Biotechnol* 29, 415–420. doi: [10.1038/nbt.1823](https://doi.org/10.1038/nbt.1823).
- Yu, C., Reddy, A. P., Simmons, C. W., Simmons, B. A., Singer, S. W., and VanderGheynst, J. S. (2015). Preservation of microbial communities enriched on lignocellulose under thermophilic and high-solid conditions. *Biotechnology for Biofuels* 8, 206. doi: [10.1186/s13068-015-0392-y](https://doi.org/10.1186/s13068-015-0392-y).
- Yun, K.-W., Son, H.-S., Seong, M.-J., and Kim, M.-C. (2023). Propidium Monoazide based selective iDNA monitoring method improves eDNA monitoring for harmful algal bloom Alexandrium species. *Frontiers in Marine Science* 10. Available at: <https://www.frontiersin.org/articles/10.3389/fmars.2023.1257343> [Accessed June 21, 2024].
- Zuchowicz, N., Daly, J., Lager, C., Williamson, O., & Hagedorn, M. (2021). Freezing on the beach: A robust coral sperm cryopreservation design. *Cryobiology*, 101, 135–139. <https://doi.org/10.1016/j.cryobiol.2021.04.005>
